1 **Cerebellar stimulations prevent Levodopa-induced dyskinesia in mice**  
2 **and normalize brain activity**

3 Bérénice Coutant<sup>1</sup>, Jimena Laura Frontera<sup>1,3</sup>, Elodie Perrin<sup>2,3</sup>, Adèle Combes<sup>1,3</sup>,  
4 Thibault Tarpin<sup>1</sup>, Fabien Menardy<sup>1</sup>, Caroline Mailhes-Hamon<sup>1</sup>, Sylvie Perez<sup>2</sup>,  
5 Bertrand Degos<sup>2</sup>, Laurent Venance<sup>2</sup>, Clément Léna<sup>1</sup>, Daniela Popa<sup>1</sup>

6  
7 <sup>1</sup> Neurophysiology of Brain Circuits Team, Institut de biologie de l'Ecole normale  
8 supérieure (IBENS), Ecole normale supérieure, CNRS, INSERM, PSL Research  
9 University, 75005 Paris, France

10  
11 <sup>2</sup> Dynamics and Pathophysiology of Neuronal Networks Team, Center for  
12 Interdisciplinary Research in Biology (CIRB), College de France, CNRS, INSERM,  
13 Université PSL, Paris, France

14  
15 <sup>3</sup> These authors contributed equally to the study

16  
17  
18 Correspondence should be addressed to D.P. ([daniela.popa@bio.ens.psl.eu](mailto:daniela.popa@bio.ens.psl.eu)) or to  
19 C.L. ([clement.lena@bio.ens.psl.eu](mailto:clement.lena@bio.ens.psl.eu)).

20

21

22 **SUMMARY**

23 Chronic Levodopa therapy, the gold-standard treatment of Parkinson's Disease (PD),  
24 leads to the emergence of involuntary movements, called levodopa-induced  
25 dyskinesia (LID). Cerebellar stimulations have been shown to decrease LID severity  
26 in PD patients. Here, in order to determine how cerebellar stimulations induce LID  
27 alleviation, we performed daily short trains of optogenetic stimulations of Purkinje  
28 cells (PC) in freely moving mice. We demonstrated that these stimulations are  
29 sufficient to suppress LID or even prevent their development. This symptomatic relief  
30 is accompanied by the normalization of aberrant neuronal discharge in the cerebellar  
31 nuclei, the motor cortex and the parafascicular thalamus. Inhibition of the cerebello-  
32 parafascicular pathway counteracted the beneficial effect of cerebellar stimulations.  
33 Moreover, cerebellar stimulations reversed plasticity in D1 striatal neurons and  
34 normalized the overexpression of FosB, a transcription factor causally linked to LID.  
35 These findings demonstrate LID alleviation and prevention by daily PC stimulations,  
36 which restore the function of a wide brain motor network, and may be valuable for  
37 LID treatment.

38



## 39 INTRODUCTION

40 Motor symptoms of Parkinson's disease (PD) are caused by a progressive loss of  
41 dopaminergic neurons in the substantia nigra *pars compacta*, and of their dense  
42 projections to the striatum. The gold-standard symptomatic therapy for PD patients is  
43 Levodopa (L-DOPA). However, with disease progression and chronic exposure to L-  
44 DOPA, 50-80% of patients experience a range of motor levodopa-induced  
45 complications within 5 years of treatment <sup>1</sup> including debilitating abnormal involuntary  
46 movements, called levodopa-induced dyskinesia (LID) <sup>2</sup>. So far, very few therapeutic  
47 options are available to circumvent the advent of LID in the course of L-DOPA  
48 treatment. A better understanding of the brain networks controlling LID generation  
49 and expression is critical to the development of appropriate treatments.

50 LID-associated abnormalities have been consistently observed in the basal ganglia,  
51 the thalamus and the motor cortex in humans <sup>3, 4, 5, 6</sup>, primates <sup>7, 8, 9, 10</sup> and rodents <sup>11,</sup>  
52 <sup>12, 13, 14, 15</sup>. In line with these observations, interactions in this inter-connected motor  
53 network contribute to LID pathophysiology <sup>16</sup>. More recently, alleviation of LID in  
54 humans have been observed following stimulations of the cerebellum <sup>5, 17, 18, 19, 20</sup>.  
55 While a single short (1-2 minutes) session of repetitive transcranial magnetic (rTMS)  
56 continuous theta burst (cTBS) stimulation over the cerebellum only transiently  
57 reduced LID, the repetition of stimulation sessions over 2 weeks yielded a reduction  
58 of peak-dose LID over weeks after the sessions <sup>18, 19</sup>. This showed that cerebellar  
59 stimulations could reduce the expression of LID. The impact of these stimulations  
60 was observed in the cerebellar nuclei <sup>17</sup>, suggesting that their effect is mediated by  
61 the output cells of the cerebellar cortex, the Purkinje cells (PC) and propagated to  
62 downstream structures.

63 A first possibility is that cerebellar stimulations correct motor cortex dysfunction  
64 observed in dyskinesia. Indeed, dyskinetic patients present an increase in cerebral  
65 blood flow in the primary motor cortex <sup>21</sup>, as well as abnormal synaptic plasticity <sup>22</sup>.  
66 Similarly, dyskinetic rats exhibit changes in gene expression <sup>23</sup> and an increased  
67 activity in about half of the neurons of the motor cortex <sup>24</sup>. In addition, subthalamic  
68 deep brain stimulation, which reduce PD symptoms and thus prevent the need of  
69 high L-DOPA dosage producing LID, have been proposed to act via an effect on the  
70 motor cortex <sup>25, 26</sup>. Likewise, cerebellar cTBS has been shown to exert a control on  
71 motor cortex plasticity <sup>27</sup>. Moreover, anodal direct current stimulation over the  
72 cerebellum, which is thought to increase the cerebello-cortical coupling <sup>28</sup>, also led to  
73 a decrease in LID <sup>29</sup>. Therefore, the motor cortex could be the relay of cerebellar  
74 stimulations in the treatment of LID.

75 LID is also directly linked to abnormal molecular events taking place in striatal  
76 neurons <sup>30, 31</sup>. Most notably, LID has been causally linked to changes in the  
77 expression of FosB, a transcription factor, and its truncated splice variant  $\Delta$ FosB.  
78 Dyskinetic patients <sup>32</sup>, primates <sup>33, 34</sup> and rodents <sup>35, 36, 37, 38, 39</sup> show an  
79 overexpression of FosB/ $\Delta$ FosB that strongly correlates with the severity of dyskinesia  
80 <sup>38</sup>. The upregulation of FosB/ $\Delta$ FosB in striatal neurons of experimental animals is  
81 sufficient to trigger LID in response to acute administration of levodopa <sup>7, 40</sup>, and  
82 reciprocally the inactivation of striatal FosB/ $\Delta$ FosB reduces LID <sup>34, 41</sup> establishing the  
83 causal contribution of this transcription factor to LID. LID is associated with strong  
84 changes in striatal synaptic plasticity <sup>14, 42</sup>. These aberrant corticostriatal plasticity's  
85 are indeed a feature shared with a number of other hyperkinetic movement disorders,  
86 suggesting that they participate to the pathological state <sup>43, 44</sup>. Besides its cortical  
87 inputs, the striatum receives massive inputs from the thalamus <sup>45</sup>. The thalamo-

88 striatal pathway could also relay therapeutic activities as demonstrated by the  
89 reduction of LID following deep brain stimulation of the intralaminar thalamo-striatal  
90 CM-PF complex in PD patients <sup>46</sup> and dyskinetic rats <sup>47</sup>. The cerebellum indeed  
91 projects to the basal ganglia by way of the intralaminar thalamus <sup>48, 49, 50, 51</sup> and may  
92 control the cortico-striatal plasticity <sup>49</sup>. Cerebellar stimulations could therefore directly  
93 restore striatal function in LID.

94 To investigate the mechanisms underlying the alleviation of LID by cerebellar  
95 stimulations, we studied the effect of optogenetic PC stimulations on these abnormal  
96 involuntary movements using L7-ChR2-YFP mice <sup>52</sup> in combination with a well-known  
97 mouse model of LID <sup>53</sup>. We performed daily brief sessions of theta-rhythm  
98 optogenetic stimulations of PC in Crus II, the region associated with orolingual  
99 sensorimotor function of the cerebellum <sup>54, 55</sup>. These stimulations did specifically  
100 suppress, or even prevent, if administered early enough, severe orolingual LID.  
101 These behavioral findings were paralleled with a normalization of the aberrant  
102 neuronal activity in the deep cerebellar nuclei, especially the interposed nucleus, in  
103 the oral primary motor cortex and in the parafascicular thalamus, indicating a wide-  
104 scale action of cerebellar stimulations on the motor system. The chemogenetic  
105 inactivation of the cerebello-parafascicular pathway counteracted the beneficial  
106 effects of cerebellar stimulations, suggesting that they are mediated via the cerebello-  
107 thalamo-striatal pathway. Indeed, cerebellar stimulations reversed the sign of  
108 corticostriatal plasticity by promoting long-term depression in D1-expressing neurons  
109 and normalized the striatal expression of FosB/ $\Delta$ FosB indicating that cerebellar  
110 stimulations act on the core of LID genesis.

111

112 **RESULTS**

113

114 **Optogenetic Purkinje cell stimulations in the orolingual region of the cerebellar**  
115 **hemisphere specifically suppress or prevent orolingual dyskinesia**

116 To study the effect of repeated sessions of optogenetic stimulations of PC on  
117 dyskinesia, we used a classical mouse model of LID. LID were produced by repeated  
118 systemic injections of levodopa in mice that underwent dopaminergic depletion  
119 following 6-OHDA injection in the median forebrain bundle, which project mainly to  
120 the dorsal striatum (**Figure 1a-c**). 6-OHDA-lesioned animals chronically treated with  
121 levodopa alone (condition "LID", N=19) indeed exhibited severe oral, axial and limb  
122 dyskinesia, compared to non-lesioned levodopa-treated sham mice (condition  
123 "SHAM", N=17) (**Figure 1d-g**). The dyskinesia score peaked around 30-40 minutes  
124 after levodopa injection (**Figures S1b, S2b, S3b**) as described in previous studies<sup>56</sup>,  
125<sup>57</sup>, consistent with LID severity following plasmatic levels of levodopa<sup>53, 58</sup>, hence  
126 referred to as peak-dose dyskinesia. These effects were observed during the 6  
127 weeks of daily levodopa administration.

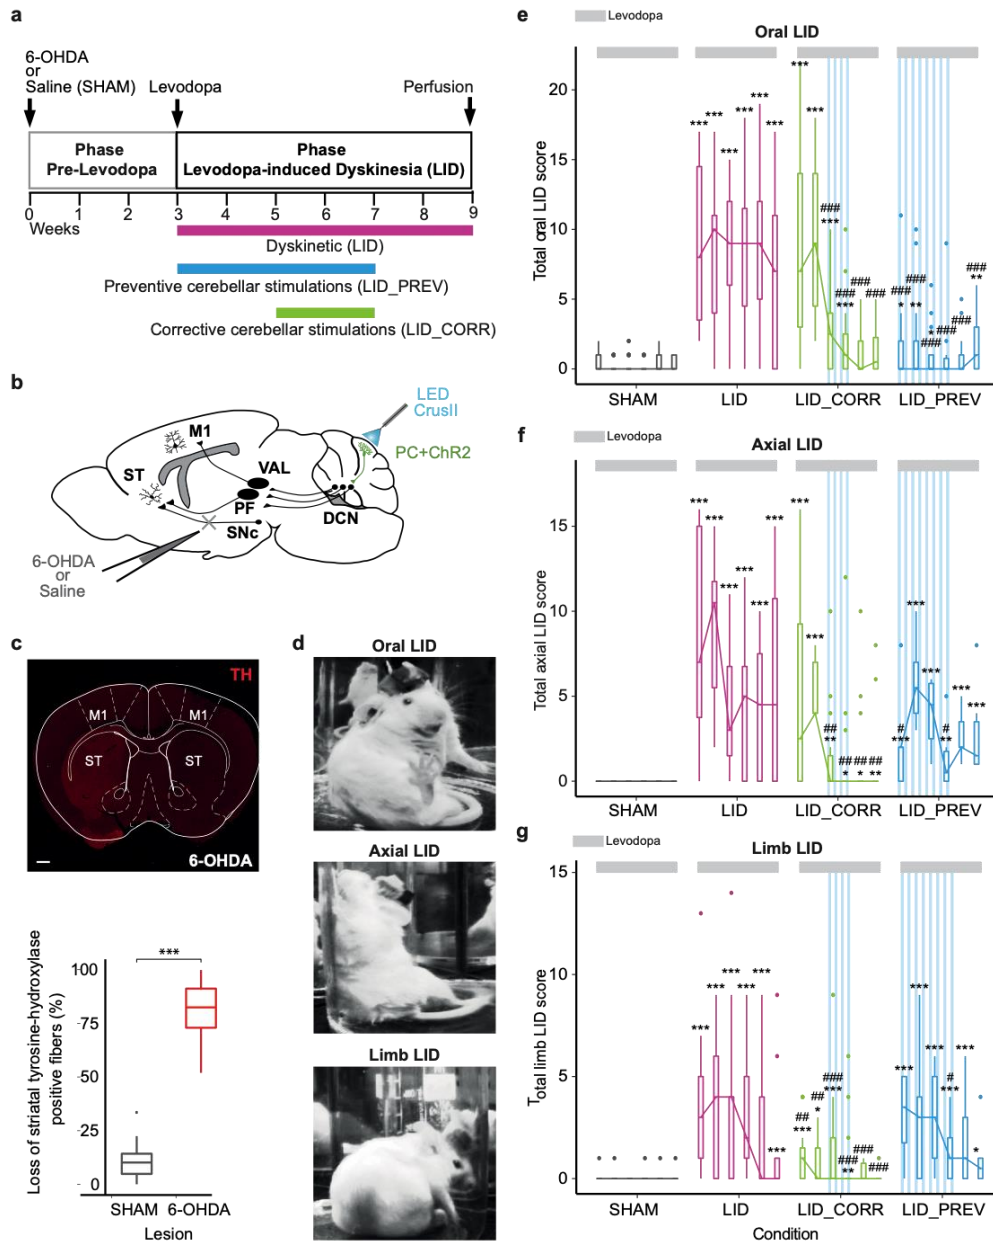

**Fig. 1 Optogenetic stimulations of Crus II Purkinje cells both reduce and prevent severe oral peak-dose dyskinesia.**

**a** Experimental timeline. Dyskinetic mice (LID, magenta): 6 weeks of levodopa treatment. Preventive mice (LID\_PREV, blue): 6 weeks of levodopa treatment + 4 weeks of cerebellar stimulations. Corrective mice (LID\_CORR, green): 6 weeks of levodopa treatment + 2 weeks of cerebellar stimulations. **b** Sagittal schematic of a mouse brain showing cerebello-thalamo-cortical and -striatal pathways, ChR2-YFP in Purkinje cells (PC+ChR2, green), and injection site of 6-OHDA or saline. M1: Primary motor cortex, ST: striatum, VAL: Ventroanterior-ventrolateral complex of the thalamus, PF: Parafascicular nucleus of the thalamus, SNc: Substantia nigra *pars compacta*, DCN: deep cerebellar nuclei, CrusII: Crus2 of the ansiform lobule. **c** *Upper panel*: Coronal section from a mouse unilaterally-lesioned with 6-OHDA stained with anti-tyrosine hydroxylase (TH). Scale bar: 0.5 mm. M1: Primary motor cortex, ST: Striatum. *Bottom panel*: Loss of striatal TH-positive fibers (%) between the lesioned and the intact striatum in control mice (grey, N=17) and parkinsonian animals (red, N=40). **d** Examples of orolingual (top), axial (middle), and limb (bottom) levodopa-induced dyskinesia in dyskinetic mice. **e** Boxplot showing the sum of oral LID scores across the 6 weeks of levodopa treatment (light grey bar) for SHAM (grey, N=18), LID (magenta, N=19); LID\_CORR (green, N=17); LID\_PREV (bleu, N=24). Stripped blue lines: weeks of theta-burst PC stimulations. **f** Boxplot showing the sum of axial LID across the 6 weeks of levodopa treatment (light grey bar) for SHAM (grey, N=12), LID (magenta, N=8), LID\_CORR (green, N=14), LID\_PREV (bleu, N=6). Stripped blue lines: weeks of theta-burst PC stimulations. **g** Boxplot showing the sum of limb LID scores across the 6 weeks of levodopa treatment (light grey bar) for SHAM (grey, N=14), LID (magenta, N=9), LID\_CORR (green, N=15), LID\_PREV (bleu, N=9). Stripped blue lines: weeks of theta-burst PC stimulations.

Boxplots represents the lower and the upper quartiles as well as the median of LID score. Kruskal-Wallis test with pairwise Wilcoxon test and Benjamini & Hochberg correction. \*\*\* $p < 0.001$ ; \*\* $p < 0.01$ ; \* $p < 0.05$ ; \*7 compared to SHAM; # compared to LID. See also Table S1.

129 Sham-lesioned mice exposed to chronic levodopa treatment received either  
130 corrective or preventive optogenetic cerebellar stimulations, or none. They did not  
131 exhibit any kind of severe dyskinesia, neither before nor during cerebellar  
132 stimulations (**Figure S4**), and were therefore pooled together for behavioral analysis.  
133 To examine whether PC stimulations efficiently reversed or prevented LID, brief  
134 trains of optogenetic stimulations at theta frequency<sup>19, 59</sup> were delivered daily in mice  
135 expressing ChR2 specifically in PC<sup>52, 60</sup> (**Figure 2b,c**). Stimulations either started 2  
136 weeks after (“corrective stimulations”), or preceded (“preventive stimulations”), LID  
137 onset (**Figure 1a**).

138

139 In 6-OHDA-lesioned mice exhibiting severe dyskinesia upon repeated levodopa  
140 injections, 2 weeks of daily corrective PC stimulations on the cerebellar orolingual  
141 region Crus II significantly reduced oral dyskinesia (condition “LID\_CORR”, N=24,  
142 **Figures 1e, S1b, Table S1**). This effect persisted at least for 2 weeks after the end of  
143 cerebellar stimulations (weeks 8 and 9, **Figures 1e, S1b, Table S1**) and the  
144 dyskinesia scores were then similar to those of the control group (**Table S1**).  
145 Furthermore, after corrective PC stimulations over orolingual CrusII, the reduction in  
146 oral LID was more pronounced than in axial and limb dyskinesia (**Figures 1f-g, S2b,**  
147 **S3b**).

148 Another group of 6-OHDA-lesioned mice received daily cerebellar stimulations  
149 starting from the first day of levodopa administration (3mg/kg) i.e before the  
150 development of dyskinesia (condition “LID\_PREV”, N=18). Remarkably, this group  
151 exhibited only few to none orolingual dyskinesia, contrarily to LID animals (**Figures**  
152 **1e, S1b, Table S1**). In conclusion, 2 weeks of daily cerebellar stimulations led to a  
153 dramatic decrease of LID expression that outlasted the stimulations for at least 2

154 weeks, while stimulations starting concomitantly with levodopa administration  
155 prevented LID development. Therefore, these results indicate a strong suppressive  
156 effect of peak-dose dyskinesia by cerebellar PC stimulations.

157 Previous studies in animals models of LID addressed exclusively “peak-dose”  
158 dyskinesia <sup>61</sup>. Yet, mild dyskinesia also occurred outside the 2 hours following the  
159 injection time as in PD patients at the trough of blood levodopa concentration (“off-  
160 period” dyskinesia) or during the rising and falling phase of blood levodopa  
161 concentrations (diphasic dyskinesia) review in <sup>62</sup>. Therefore, analysis of dyskinesia  
162 observed 20 minutes before levodopa injection revealed that chronic PC stimulations  
163 on CrusII also suppressed or prevented oral “off-period” dyskinesia depending on the  
164 protocol used (**Figure S1c, Table S1**).

165 In conclusion, daily sessions of opto-stimulations of PC in CrusII, which corresponds  
166 to the orolingual region of the cerebellar cortex, is sufficient to obtain a significant  
167 decrease of oral LID. These results bear resemblance with those obtained in PD  
168 patients in whom rTMS targeting posterior cerebellum improved LID scores <sup>18, 19</sup> but  
169 show a stronger effect than in humans were the severity of dyskinesia was only  
170 reduced at the peak effect of levodopa.

171

172

### 173 **Purkinje cell stimulations over CrusII modulate aberrant activity of the** 174 **cerebellar nuclei**

175 To test whether and how systemic levodopa treatment results in changes of activity in  
176 the cerebellum, we chronically recorded neurons in the three deep cerebellar nuclei  
177 (DCN): the interposed nucleus (IN), the dentate nucleus (DN), and the fastigial  
178 nucleus (FN) (**Figures 2b, S5b**). Neuronal activity was recorded both before and

179 after levodopa administration in freely moving 6-OHDA-lesioned and control mice, for  
180 a total of 9 weeks (**Figures 2a,b, S5a-c**). Recordings in three mice from DCN  
181 neurons during the stimulation protocol revealed that cells in the three DCN, strongly  
182 inhibited by the stimulation (hence likely receiving inputs from the stimulated area),  
183 exhibited an alternation of cessation of firing and increased firing relative to the  
184 baseline activity along the protocol (**Figure 2c**). We observed that levodopa  
185 decreased the global activity of IN and DN, but not FN, in LID animals (**Figures 2d,**  
186 **S5d-f, Tables S2, S3**). We verified that this did not reflect changes in motor activity  
187 (**Supp. Text, Figure S6**). Altogether, these results constitute the first evidence of a



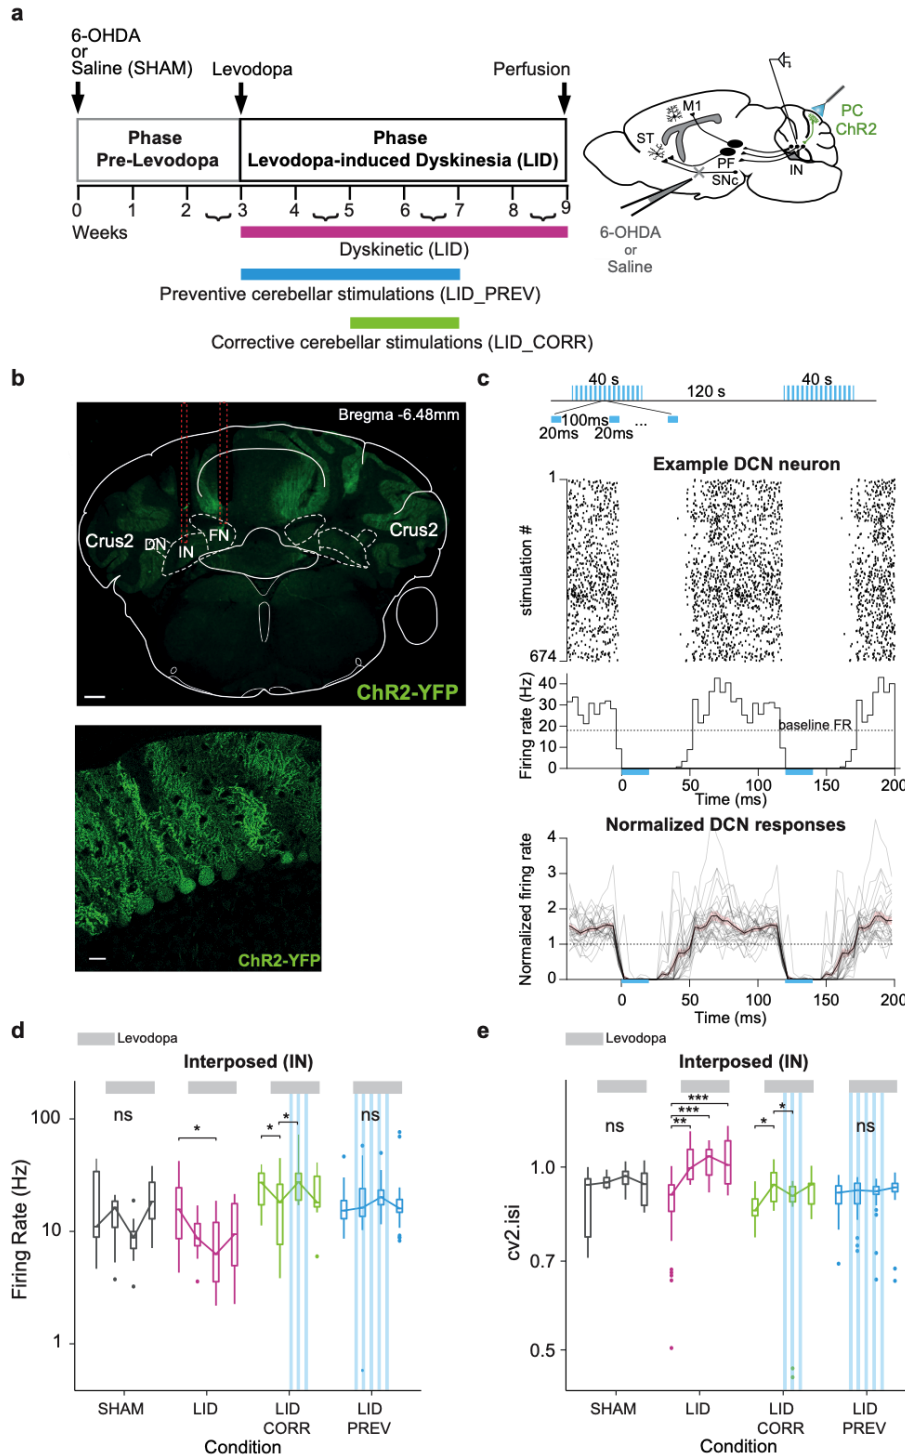

**Fig. 2 Purkinje cell stimulations normalize firing rate and regularize pattern of activity in the interposed nucleus. a** *Left*: Experimental timeline. *Right*: Schematic of electrode implantation in the interposed nucleus (IN), ChR2-YFP expression in Purkinje cells (PC+ChR2, green) and injection site of 6-OHDA or saline. ST: Striatum; SNc: substantia nigra pars compacta; M1: Primary motor cortex; PF: Parafascicular nucleus of the thalamus. **b** *Top*: Coronal section from L7-ChR2-YFP mouse. Red lines: electrode's trajectory. Dotted white lines: IN and fastigial (FN) nuclei. Scale bar: 0.5 mm. Crus2: Crus2 of the ansiform lobule, DN: Dentate cerebellar nucleus. *Bottom*: PC expressing YFP. Scale bar: 20 $\mu$ m. **c** *Top*: Theta-burst protocol. *Middle*: Raster plot of a deep cerebellar nuclei (DCN) neuron for each stimulation. Dotted line: Basal firing rate (FR) before the onset of stimulations. Blue box: Time of optogenetic stimulation. *Bottom*: Summary of DCN firing profiles (n=27; N=3) exhibiting a strong inhibition (>90%) during PC stimulations. The firing rate of each unit was normalized to its baseline. Shaded lines: mean  $\pm$  std. **d** Firing rate (Hz) across 9 weeks in the IN. Boxplots show the median rate (horizontal bars) over 4 categories of weeks. First boxplot: 2<sup>nd</sup> and 3<sup>rd</sup> weeks; second boxplot: 4<sup>th</sup> and 5<sup>th</sup> weeks when levodopa begins; third boxplot: 6<sup>th</sup> and 7<sup>th</sup> weeks; last boxplot: 8<sup>th</sup> and 9<sup>th</sup> weeks when stimulations stopped. Grey = SHAM (N=5); Magenta = LID (N=3); Green = LID\_CORR (N=4); Blue = LID\_PREV (N=3). Light grey lines: 6 weeks of levodopa treatment (3 boxplots). Stripped blue lines: weeks of theta-burst stimulations. **e** Coefficient of variation 2 (cv2.isi) across 9 weeks in the IN. Same order of boxplot as panel **d**. Grey = SHAM (N=5); Magenta = LID (N=3); Green = LID\_CORR (N=4); Blue = LID\_PREV (N=3). Light grey lines: 6 weeks of levodopa treatment (3 boxplots). Stripped blue lines: weeks of theta-burst stimulations. Boxplots represents the lower and the upper quartiles. Welch Anova with Games Howell post-hoc test and one-way Anova's with Tukey post-hoc test based on Levene test. \*\*\*p < 0.001; \*\*p < 0.01; \*p < 0.05; ns: p > 0.5. See also Tables S2, S3, and S4.

189 dysregulated activity of the output nuclei of the cerebellum by levodopa in LID.

190

191 *Purkinje cell stimulations over CrusII prevent the decrease of activity in the*  
192 *interposed nucleus*

193 For animals receiving 2 weeks of PC stimulations (LID\_CORR), we found that the  
194 depressed activity in IN induced by levodopa treatment was restored during the  
195 period of cerebellar stimulations, but this effect did not last after the end of the  
196 stimulations (**Figures 2d, Tables S2, S3**). The effect was stronger in animals  
197 receiving 4 weeks of preventive PC stimulations (LID\_PREV). The most striking  
198 effect was observed in IN where PC stimulations prevented the global decrease of  
199 firing rate (**Figure 2d, Tables S2, S3**). The effects of PC stimulations were less clear  
200 in DN and FN (**Figure S5d-f, Tables S2, S3**). Taken together, these data show that  
201 repeated sessions of cerebellar stimulations affected the aberrant activities observed  
202 under levodopa treatment in the three DCN. However, only IN exhibited a consistent  
203 normalization, which suggests a prominent role of this structure in the normalization  
204 of the dyskinesia.

205

206 *Levodopa treatment causes DCN neurons to develop a more erratic activity in*  
207 *dyskinetic mice*

208 The irregularity of neural discharge in the cerebellum is detrimental to motor control  
209 <sup>63</sup> and has been observed in rapid-onset dystonia-Parkinsonism <sup>64, 65</sup> and tremor <sup>66</sup>.  
210 The average normalized difference of successive interspike intervals (cv2.isi) is a  
211 measure of irregularity of directly adjacent interspike intervals, and therefore higher  
212 cv2.isi value indicates a more irregular cell activity <sup>67</sup>. Interestingly, LID mice  
213 exhibited a higher cv2.isi in IN, DN and FN during the entire period of levodopa

214 treatment (**Figures 2e, S5e-g, Tables S2, S4**). The higher values of cv2.isi did not  
215 simply reflect increased bursting (**Supp. Text, Figure S8a**). Therefore, these results  
216 showed a more erratic and irregular pattern in DCN neurons in LID mice, mostly  
217 during periods of activity, during levodopa treatment.

218

219 *Purkinje cells stimulations in CrusII prevent changes in pattern of activity in the*  
220 *interposed nucleus*

221 In mice receiving 2 weeks of PC stimulations (LID\_CORR), the cv2.isi significantly  
222 increased the first 2 weeks of levodopa treatment in IN and was normalized during  
223 PC stimulations (**Figure 2e, Tables S2, S4**). In contrast, cv2.isi values remained  
224 significantly elevated in DN and FN (**Figure S5e-g, Tables S2, S4**).

225 In mice receiving 4 weeks of PC stimulations (LID\_PREV), we found that the  
226 increased cv2.isi in IN was prevented by PC stimulations (**Figure 2e, Tables S2, S4**).  
227 However, increased cv2.isi was still present in DN and FN (**Figure S5e-g, Tables S2,**  
228 **S4**). Moreover, as in LID animals, locomotor activity did not change the cv2.isi values  
229 neither in LID\_CORR nor in LID\_PREV mice.

230 Overall, these electrophysiological data suggest that dyskinesia-related abnormal  
231 activity is conveyed to the DCN, especially to IN, leading to aberrant firing rate and  
232 firing patterns, which are reversed by chronic PC stimulations. Finally, these  
233 experiments suggest a tighter association between the changes in IN activity and the  
234 alleviation of the pathological phenotype.

235

236

237 **Chronic levodopa treatment increases the activity of the oral motor cortex and**  
238 **decreases the firing rate in the parafascicular thalamic nucleus of dyskinetic**  
239 **mice**

240 Since LID strongly involve the forebrain motor circuits <sup>16</sup>, and cerebellar nuclei have  
241 multiple ascending projections toward these circuits <sup>68, 69</sup>, we next investigated the  
242 impact of cerebellar stimulations in the thalamus and motor cortex. Changes in motor  
243 cortex activity, intralaminar nuclei of the thalamus, including the parafascicular  
244 nucleus (PF), and the ventroanterior-ventrolateral (VAL) complex of the thalamus  
245 have been observed in dyskinetic patients <sup>21, 22, 46</sup> and animals <sup>23, 24, 47</sup>. Moreover,  
246 cerebello-cortical loops <sup>70, 71</sup> and parafascicular projections to the striatum and to the  
247 cerebral cortex <sup>72</sup> are topographically organized. Therefore, to examine the impact of  
248 cerebellar stimulations on the thalamus and motor cortex, we chronically recorded  
249 neurons in the oral region of M1, and in the thalamic PF and VAL, during 5 weeks of  
250 chronic levodopa treatment (**Figures 3a,b, S9a,b**).

251 The activity in M1 and PF varied slightly over the course of levodopa treatment in  
252 SHAM animals, whereas LID mice exhibited a significant increase of the firing rate in  
253 M1 (**Figure 3c, Tables S5, S6**) and a significant decrease in the firing rate in PF after  
254 levodopa administration (**Figure 3d, Tables S5, S6**). The effects were more  
255 inconsistent in VAL (**Figure S9d, Tables S5, S6**). Altogether, these results confirm  
256 the presence of functional alterations in PF and oral M1 in dyskinesia.

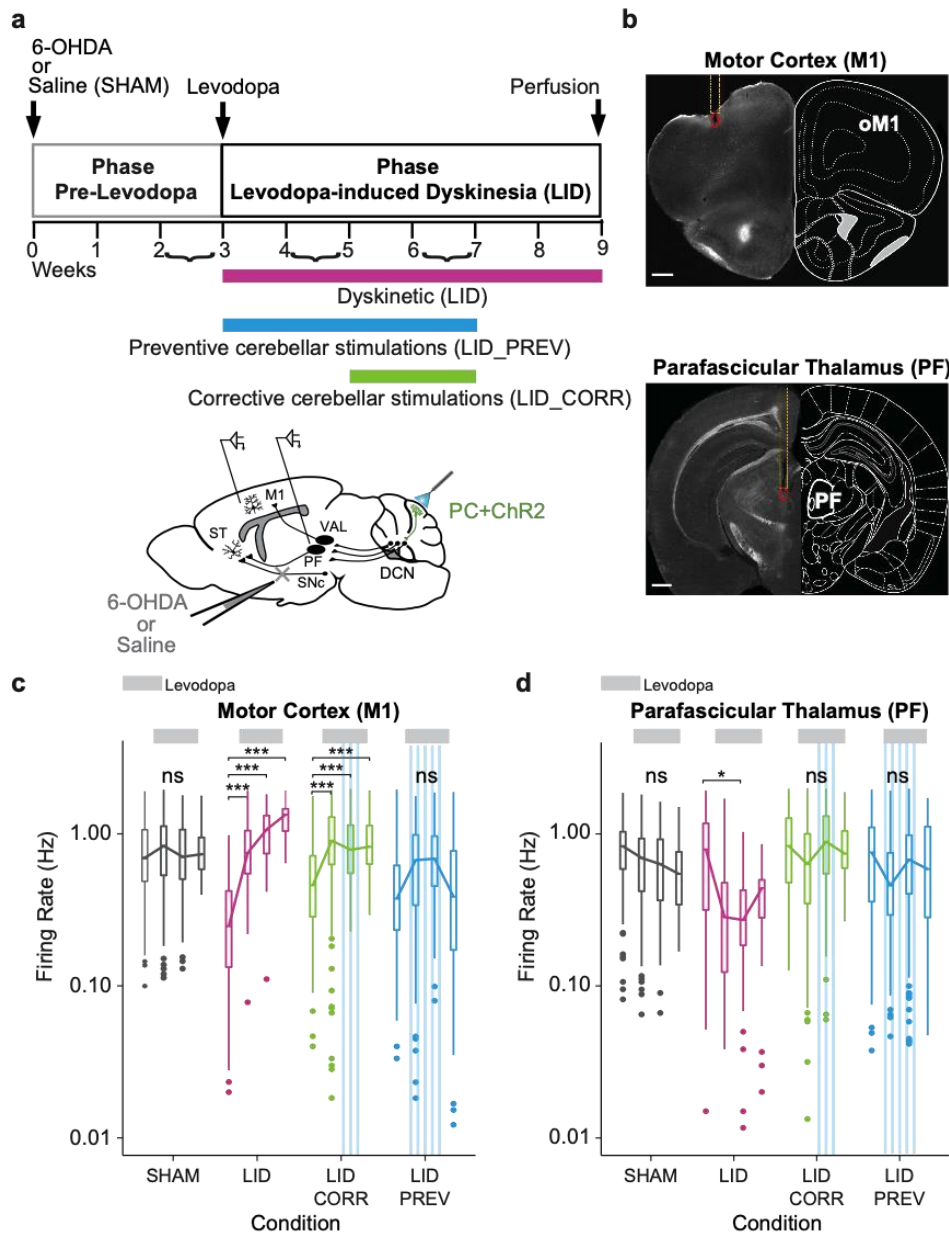

**Fig. 3 Aberrant activity in the motor cortex and the parafascicular nucleus of the thalamus in dyskinesia is restored by Purkinje cell stimulations.**

**a** *Top*: Experimental timeline. *Bottom*: Schematic of electrode implantation in the primary motor cortex (M1) and the parafascicular nucleus of the thalamus (PF), ChR2-YFP expression in the Purkinje cells (PC+ChR2, green), and injection site of 6-OHDA or saline. ST: Striatum; SNc: substantia nigra *pars compacta*; DCN: deep cerebellar nuclei; VAL: Ventroanterior-ventrolateral complex of the thalamus. **b** *Top*: Coronal section from L7-ChR2-YFP mouse showing the electrode's trajectory (dotted yellow line) and the lesion site (red circle) in layer 5 of the oral M1 (oM1). Scale bar: 0.5 mm. *Bottom*: Coronal section from L7-ChR2-YFP mouse showing the electrode's trajectory (dotted yellow line) and the lesion site (red circle) in the parafascicular nucleus of the thalamus (PF). Scale bar: 0.5 mm. **c** Firing rate (Hz) across 9 weeks in M1. Boxplots show the median rate (horizontal bars), over 4 categories of weeks. First boxplot: 2<sup>nd</sup> and 3<sup>rd</sup> week of the protocol, second boxplot: 4<sup>th</sup> and 5<sup>th</sup> weeks when levodopa begins, third boxplot: 6<sup>th</sup> and 7<sup>th</sup> weeks, last boxplot: 8<sup>th</sup> of the protocol when stimulations stopped. Grey = SHAM (N=5); Magenta = LID (N=4); Green = LID\_CORR (N=6); Blue = LID\_PREV (N=8). Light grey lines: 6 weeks of levodopa treatment (3 boxplots). Stripped blue lines: weeks of theta-burst PC stimulations. **d** Firing rate (Hz) across 9 weeks in the parafascicular nucleus of the thalamus (PF). Same order of boxplot as panel c. Grey = SHAM (N=5); Magenta = LID (N=4); Green = LID\_CORR (N=6); Blue = LID\_PREV (N=8). Light grey lines: 6 weeks of levodopa treatment (3 boxplots). Stripped blue lines: weeks of theta-burst PC stimulations.

Boxplots represents the lower and the upper quartiles. One-way Anova with Tukey HSD post-hoc test. \*\*\*p < 0.001; \*\*p < 0.01; \*p < 0.05; ns: p > 0.5. See also Tables S5 and S6.

258 **Purkinje cell stimulations over CrusII prevent both the abnormal increase of**  
259 **activity in M1 and the decrease in PF in dyskinetic mice**

260 We then investigated whether the abnormal activities observed in M1 and PF could  
261 also be normalized by chronic PC stimulations. Chronic extracellular recordings in  
262 dyskinetic mice receiving 2 weeks of PC stimulations (LID\_CORR) showed that the  
263 global firing rate of oral M1 significantly increased the first 2 weeks of levodopa  
264 treatment (**Figure 3c**, 2<sup>nd</sup> boxplot), as observed in LID animals (**Figure 3c, Tables**  
265 **S5, S6**). However, contrarily to these animals, no further increase was found after the  
266 stimulations started (**Figure 3c**, 3<sup>rd</sup> boxplot). In PF, the decrease observed in  
267 dyskinetic mice was not observed during cerebellar stimulations (**Figure 3d, Tables**  
268 **S5, S6**).

269 In animals receiving 4 weeks of preventive cerebellar stimulations (LID\_PREV), both  
270 the increased activity in oral M1 observed in LID (**Figure 3c, Tables S5, S6**) and the  
271 decreased activity in PF in LID were prevented (**Figure 3d, Tables S5, S6**), and  
272 remained normal even after the end of the stimulations. As for LID mice, the effects  
273 observed in the motor thalamus VAL were more variable in the corrective and the  
274 preventive conditions, suggesting that both levodopa and repeated sessions of  
275 cerebellar stimulations have less impact on this structure (**Figure S9d, Tables S5,**  
276 **S6**).

277 Taken together, these results suggest that the effects induced by cerebellar  
278 stimulations restore activities of both oral M1 and PF, by being able to reverse the  
279 changes in firing rate associated with dyskinesia.

280

281

282

283 **The cerebellum is connected to the parafascicular nucleus of the thalamus**

284 Because both DCN and PF showed a similar modulation of their firing rate, we  
285 examined how IN, DN, and FN project to PF. For this purpose, we used retrograde  
286 viral tracing that allowed us to determine the distribution of DCN neurons projecting  
287 to PF (**Figure 4a**). Quantification of retrograde labeled neurons from PF showed  $42.1$   
288  $\pm 9.0$  % of projecting neurons in IN,  $41.4 \pm 2.6$  % of neurons in DN, and  $16.5 \pm 1.7$  %  
289 of neurons in FN (N=6, **Figure 4b-d**), suggesting that IN and DN might have an  
290 important contribution in the cerebellar control of PF activity. Moreover, PF-projecting  
291 DCN neurons were localized along the entire antero-posterior axis in the three nuclei  
292 (**Figure 4b,c,e**).

293 To confirm the presence of DCN synaptic terminals in PF neurons, we localized the  
294 synaptic terminals of DCN neurons projecting to PF using Cre-dependent viral  
295 expression of the presynaptic marker synaptophysin (SynP)-GFP in combination with  
296 the expression of Cre-recombinase obtained by retrograde viral injections in PF  
297 (**Figure 4f**). Large amount of DCN terminals expressing SynP-GFP were found in PF  
298 (**Figure 4g,h**), and much less in other thalamic nuclei as VAL (**Figure 4i,j**). Overall,  
299 these results confirm the presence of cerebellar projections to PF and demonstrate  
300 that they originate from a population distinct from the one projecting to VAL.



301

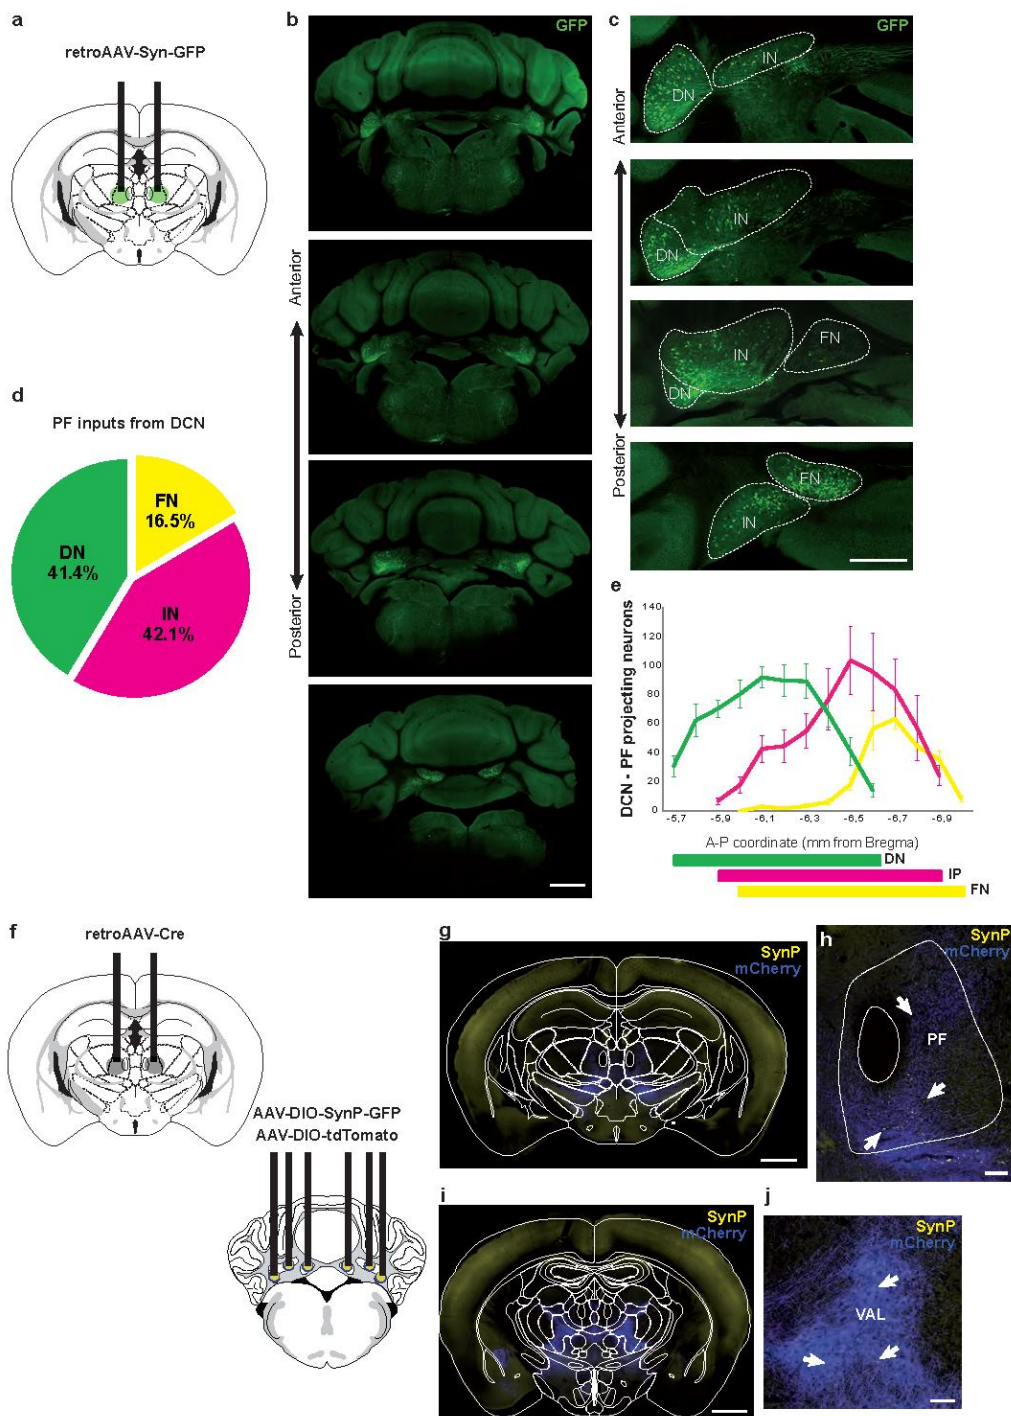

**Fig. 4 DCN monosynaptic inputs to PF and collaterals.**

**a** Retrograde labeling strategy by viral injection of retrograde AAV-syn-GFP in the parafascicular nucleus of the thalamus (PF). **b** Anterior to posterior cerebellar sections showing retrograde labeled neurons in the three deep cerebellar nuclei (DCN): dentate (DN), interposed (IN), and fastigial (FN). Scale bar: 1 mm. **c** High-magnification on DCN from **b**. Scale bar: 0.5 mm. **d** Quantification of the cell fraction (%) of retrograde labeled DN, IN and FN neurons projecting to PF. **e** Distribution of retrograde labeled DCN neurons projecting to PF in each nucleus. **f** Tracing of axon collaterals from DCN-PF projecting neurons by expression of retrograde AAV-Cre in PF, AAV-DIO-SynP-GFP and AAV-DIO-tdTomato in IN, FN, and DN. **g** Posterior thalamic section showing DCN neurons projecting to PF expressing Cre-dependent Synaptophysin (SynP)-GFP and tdTomato. Scale bar: 1mm. **h** Zoom-in of PF section exhibiting synaptic boutons (arrows) in DCN inputs Scale bar: 100  $\mu$ m. **i-j** Anterior thalamic section showing axon collaterals within the thalamus. Scale bar: 1mm. **j** Zoom-in from **i** of VAL section exhibiting some synaptic boutons (arrows) from DCN-PF axon collaterals. Scale bar: 1mm.



302 **DCN-PF pathway inhibition counteracts the effects of Purkinje cell stimulations**  
303 **on oral dyskinesia in preventive mice**

304 Since DCN may entrain PF, and since PF stimulations have been used to avoid LID  
305 <sup>46, 47</sup>, we examined the involvement of the DCN-PF pathway in the effect of cerebellar  
306 stimulations in LID. We therefore examined the effect of transiently inactivating the  
307 specific projections from DCN to PF during the repeated sessions of PC opto-  
308 stimulations. For this purpose, we expressed inhibitory hM4Di DREADD receptors in  
309 DCN neurons that target PF, by injecting retrograde CAV2-Cre-GFP in PF in  
310 complementation with a Cre-dependent AAV-DIO-hM4Di-mCherry in DCN (**Figure**  
311 **5a-d**) in mice receiving 4 weeks of PC stimulations.

312 As oral LID peaked around 30 minutes after levodopa injection, we scored oral LID  
313 severity in preventive mice at this time point, and after chronic cerebellar stimulations  
314 were applied, to highlight the difference of effects between chemogenetic inhibition  
315 and optogenetic activation. Mice injected with inhibitory DREADDs, stimulated for 4  
316 weeks and receiving daily CNO injections before the stimulations, presented  
317 significantly more severe oral dyskinesia than control mice also injected with  
318 inhibitory DREADDs, stimulated for 4 weeks but receiving only daily saline injections  
319 ( $p < 0.001$ ; **Figure 5e**). These results indicate that DCN to PF inputs are involved in  
320 the preventive effect of PC stimulations.

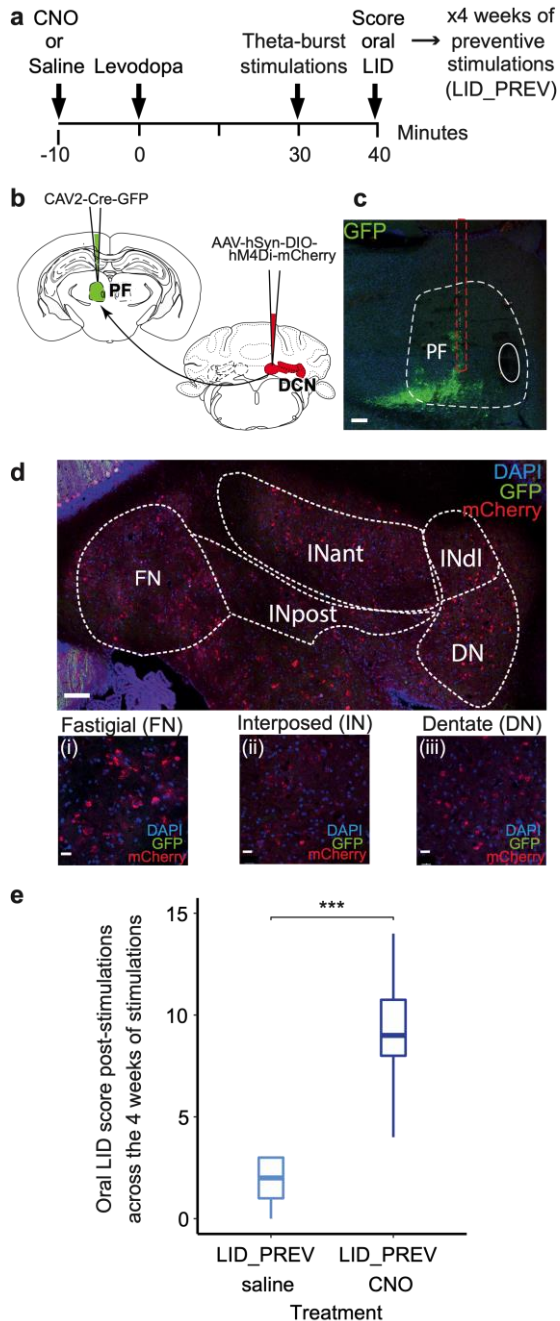

**Fig. 5 DCN to PF pathway inhibition counteracts the effects of Purkinje cells stimulation on the severity of oral dyskinesia in preventive mice**

**a** Experimental timeline. **b** Schematic of mouse coronal sections showing the injection site of the retrograde CAV2-Cre-GFP in the parafascicular nucleus of the thalamus (PF, green) ipsilateral-to-the-lesion (top, left) and the injection site of the anterograde Cre-dependent AAV-hSyn-DIO-hM4Di-mCherry in the three deep cerebellar nuclei (DCN, red) contralateral-to-the-lesion. **c** Coronal section from L7-ChR2-YFP mouse showing the injection site of retrograde CAV2-Cre-GFP in PF. Red dotted lines: needle's trajectory. White dotted lines highlight the limits of PF within the thalamus. Scale bar: 100  $\mu$ m. **d** Coronal section from L7-ChR2-YFP mouse showing the expression of anterograde pAAV-hSyn-DIO-hM4Di-mCherry in neurons (red) of DCN. Med: medial cerebellar nucleus; IntP: interposed cerebellar nucleus, posterior part; IntA: interposed cerebellar nucleus, anterior part; IntDL: interposed cerebellar nucleus, dorsolateral hump; Lat: lateral cerebellar nucleus. Blue = DAPI; green = GFP; Red = mCherry. Scale bar: 100  $\mu$ m. Insert: Postmortem histology showing hM4Di-mCherry-expressing neurons in the fastigial nucleus (i, FN), the interposed nucleus (ii, IN), and the dentate nucleus (iii, DN). Scale bars: 20 $\mu$ m. **e** Boxplots showing the average score of oral LID severity at the point time corresponding to 40 minutes after levodopa injection, 50 minutes after CNO injection and right after chronic theta-burst stimulations of Purkinje cells. Average score comprises the 4 weeks of preventive cerebellar stimulations in two groups: light blue represents preventive animals receiving 4 weeks of cerebellar stimulations + daily injections of both levodopa and saline (LID\_PREV saline, N=5), dark blue represents preventive animals receiving 4 weeks of cerebellar stimulations + daily injections of both levodopa and CNO (LID\_PREV CNO, N=6). Horizontal bars represent the median score. Boxplots represent the lower and the upper quartiles. Non-parametric Kruskal-Wallis test with pairwise Wilcoxon test and a Benjamini & Hochberg correction were used. \*\*\* $p < 0.001$ ; \*\* $p < 0.01$ ; \* $p < 0.05$ ; ns:  $p > 0.05$ .

322 **Purkinje cell stimulations alter corticostriatal transmission and plasticity in**  
323 **brain slices**

324 As PF projects to the striatum<sup>72, 73, 74</sup>, it may relay a cerebellar control over  
325 corticostriatal synaptic plasticity<sup>49</sup>. Indeed, alterations in corticostriatal plasticity are  
326 found in hyperkinetic disorders such as LID<sup>14, 43</sup>. LID have notably been associated  
327 with an excessive corticostriatal long-term potentiation (LTP) in the direct pathway  
328 medium spiny neurons (MSN) without prominent change in the indirect pathway,  
329 resulting in an increased motor activity<sup>43</sup>. Direct and indirect pathway MSNs express  
330 different dopaminergic receptors, the dopamine receptor subtype-1 (D1R) or subtype-  
331 2 (D2R) respectively for the direct and indirect pathways<sup>75</sup>. Therefore, we examined  
332 *ex vivo* the corticostriatal synaptic plasticity in MSNs of the dorsolateral striatum  
333 belonging either to the direct or indirect striatal pathways using brain slices from L7-  
334 ChR2xDrd2-GFP mice subjected to 4 conditions: SHAM, SHAM\_PREV, LID or  
335 LID\_PREV (**Figure 6a**). We previously reported that using a spike-timing dependent  
336 plasticity (STDP) paradigm, paired pre-synaptic activations preceded by post-  
337 synaptic activations induced LTP in both direct and indirect pathway MSN<sup>76, 77</sup>. LTP  
338 was induced in MSNs of SHAM, SHAM\_PREV, LID or LID\_PREV mice except in  
339 direct pathway MSNs issued from LID\_PREV mice, where a clear long-term  
340 depression (LTD) was found (**Figure 6b-e and Table S12**). Interestingly, in direct  
341 pathway MSNs, LTP induced in LID mice exhibited greater magnitude ( $p < 0.0001$ )  
342 than in SHAM mice, whereas preventive PC stimulations either reduced LTP in  
343 SHAM mice ( $p < 0.0001$ ) or even reversed LTP into LTD in LID mice. The magnitude  
344 of corticostriatal LTP induced in indirect pathway MSNs did not show significant  
345 variation in SHAM and LID mice with or without preventive PC stimulations (ANOVA:  
346  $F = 0.3044$ , 38 degree of freedom,  $p = 0.8220$ ).

347 Therefore, we found that cerebellar preventive stimulations reverse striatal  
348 pathological LTP into LTD in direct pathway neurons, an effect which may then  
349 prevent the consolidation of an abnormal motor activity in the direct pathway and help  
350 reinstating normal motor functions.

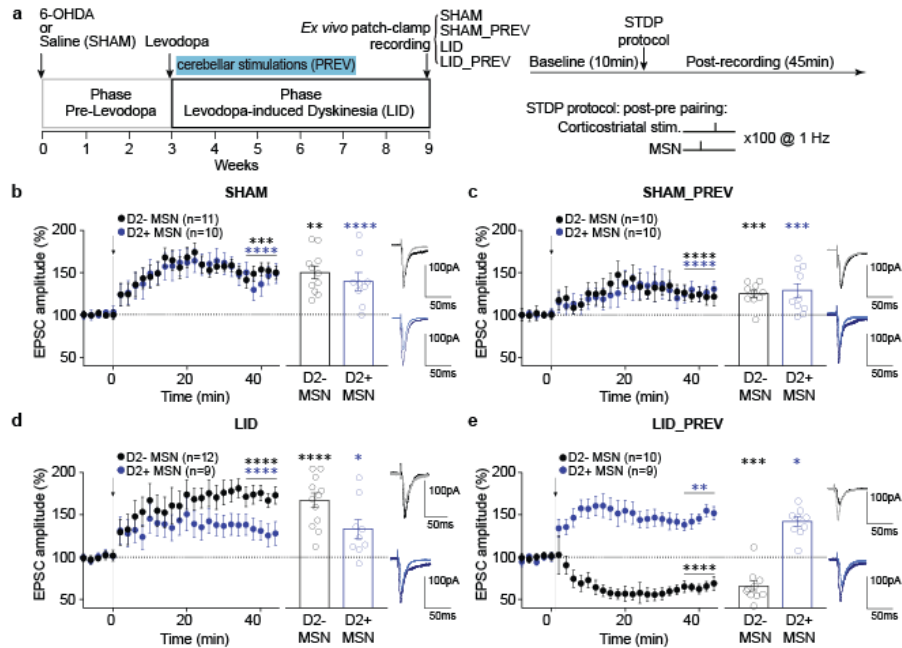

**Fig. 6 Spike-timing dependent plasticity produce LTD instead of LTP in D1-expressing neurons following Purkinje cell stimulations**

**a Left:** Experimental timeline. Control mice (SHAM): 6 weeks of levodopa treatment. Preventive control mice (SHAM\_PREV): 6 weeks of levodopa treatment + 4 weeks of cerebellar stimulations. Dyskinetic mice (LID): 6 weeks of levodopa treatment. Preventive mice (LID\_PREV): 6 weeks of levodopa treatment + 4 weeks of cerebellar stimulations. *Ex vivo* experiments were realized on mice subjected to 4 conditions, i.e. SHAM, SHAM\_PREV, LID and LID\_PREV. **Right:** STDP pairings: A single spike evoked in the recorded MSN (post) was paired with a single cortical stimulation (pre); pairings were repeated 100 times at 1 Hz.

**b-e** Averaged time courses of corticostriatal STDP in D1-MSNs and D2-MSNs induced by 100 post-pre pairings.

**b** In SHAM, LTP induced by 100 post-pre pairings in D1-MSNs and D2-MSNs (n=21).

**c** In SHAM\_PREV, LTP induced by 100 post-pre pairings in D1-MSNs and D2-MSNs (n=20).

**d** In LID, LTP induced by 100 post-pre pairings in D1-MSNs (n=12) and D2-MSNs (n=9).

**e** In LID\_PREV, LTP induced by 100 post-pre pairings in D1-MSNs (n=10) and the same protocol induced LTD in D2-MSNs (n=9).

Synaptic strength was determined 34-44 min after pairings.  
 Error bars represent the SEM. \*\*p < 0.01; \*\*\*p < 0.001; \*\*\*\*p < 0.0001 by one sample t test.

351 **Purkinje cell stimulations normalize the expression of the dyskinetic marker**

352 **FosB/ $\Delta$ FosB in the dorsolateral striatum**

353 The expression of the transcription factors FosB/ $\Delta$ FosB, from the immediate early

354 gene *fosb*, has been used as a marker of dyskinesia<sup>38</sup>. Alterations in its expression

355 within the dorsolateral striatum affects LID, as both its inactivation<sup>41</sup> and its  
 356 upregulation<sup>7, 40</sup> can respectively reduce and increase the severity of dyskinesia. We  
 357 then examined whether PC stimulations also normalize the expression of the  
 358 dyskinesic marker FosB/ $\Delta$ FosB in the dorsolateral striatum (**Figure 7a**).

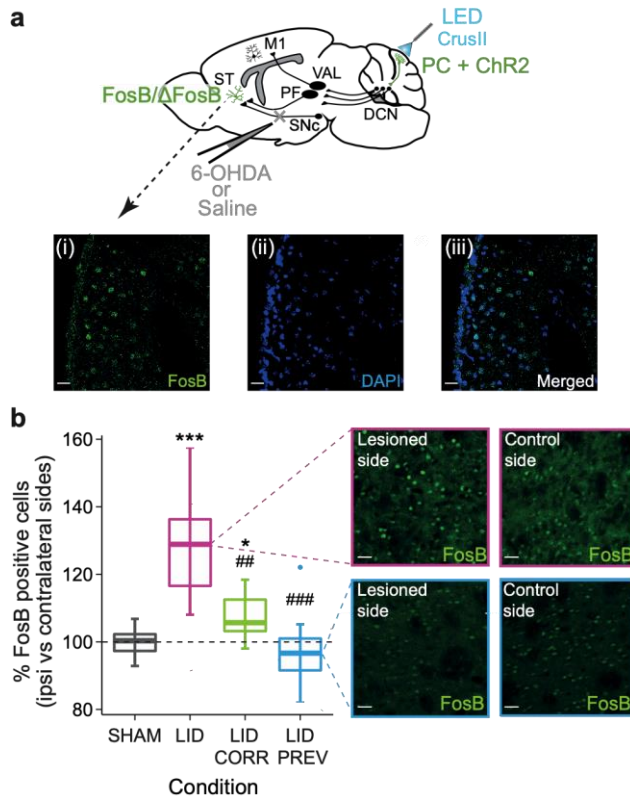

**Fig. 7 Striatal overexpression of the dyskinesic marker FosB/ $\Delta$ FosB is restored by Purkinje cell stimulations.**

**a** Sagittal schematic showing neurons in the striatum expressing the dyskinesic marker FosB/ $\Delta$ FosB (green). The cerebello-thalamo-cortical and cerebello-thalamo-striatal pathways are represented in mice expressing ChR2-YFP in Purkinje cells (PC+ChR2, green) as well as the injection site 6-OHDA or saline (grey). ST: Striatum; SNC: substantia nigra *pars compacta*; M1: Primary motor cortex, VAL: Ventroanterior-ventrolateral complex of the thalamus, PF: Parafascicular nucleus of the thalamus, DCN: deep cerebellar nuclei, CrusII: Crus2 of the ansiform lobule. Insets: Postmortem histology showing FosB-expressing neurons (i), DAPI (ii), and merged (iii). Scale bars: 20 $\mu$ m. **b** Boxplots showing the ratio of cells expressing FosB between the striatum ipsilateral to the lesion and the striatum contralateral to the lesion in percentage (%) in the 4 different conditions (magenta = LID, N=10; grey = SHAM, N=10; green = LID\_CORR, N=7; and blue = LID\_PREV, N=10). Horizontal bars in boxplots represent the median. Magenta inset: Postmortem histology showing FosB-expressing neurons in dyskinetic animals in the striatum ipsilateral to the lesion (left box) and in the striatum contralateral to the lesion (right box). Scale bars: 20 $\mu$ m. Blue inset: Postmortem histology showing FosB-expressing neurons in preventive animals in the striatum ipsilateral to the lesion (left box) and in the striatum contralateral to the lesion (right box). Scale bars: 20 $\mu$ m. Boxplots represents the lower and the upper quartiles. Student t-test. \*\*\*p < 0.001; \*\*p < 0.01; \*p < 0.05. \* Compared to SHAM; # compared to LID. See also Table S7.

359

360 We compared FosB/ $\Delta$ FosB expression in the dorsolateral striatum ipsilateral to the  
361 lesion with the dorsolateral striatum contralateral to the lesion, in all the different  
362 conditions. As expected, neither levodopa nor cerebellar stimulations impacted the  
363 expression of FosB/ $\Delta$ FosB in SHAM animals and no asymmetry was found between  
364 the two striatum (SHAM, N=10,  $99.6 \pm 1.3$  %, **Figure 7b, Table S8**). As previously  
365 demonstrated in other studies, LID mice presented an overexpression of  
366 FosB/ $\Delta$ FosB in the dorsolateral striatum ipsilateral to the lesion (LID, N=10,  $128.9 \pm$   
367  $5.0$  %, **Figure 7b, Table S8**), significantly different from the control group. 2 weeks of  
368 cerebellar stimulations decreased the asymmetric expression of FosB/ $\Delta$ FosB in the  
369 dorsolateral striatum of corrective mice compared to dyskinetic animals (LID\_CORR,  
370 N=7,  $107 \pm 2.8$  %, **Figure 7b, Table S8**), although still significantly different from the  
371 control animals. No significant asymmetry of striatal FosB/ $\Delta$ FosB expression was  
372 found in mice receiving 4 weeks of cerebellar stimulations (LID\_PREV, N=10,  $94.2 \pm$   
373  $3.4$  %, **Figure 7b, Table S8**), which did not significantly differ from SHAM mice.  
374 Moreover, striatal FosB/ $\Delta$ FosB expression in LID\_PREV animals was significantly  
375 different from the one observed in LID mice. Thus, our results suggest that PC  
376 stimulations are able to restore normal expression of striatal FosB/ $\Delta$ FosB, which is  
377 accompanied by an anti-dyskinetic effect.

378 In conclusion, repeated sessions of PC stimulations over CrusII can both normalize  
379 the aberrant activity of major motor structures involved in LID, including DCN, PF and  
380 M1, but also the overexpression of the dyskinetic marker FosB/ $\Delta$ FosB within the  
381 dorsolateral striatum, tightly linked to the development of LID. These effects were  
382 associated with the advent of LTD in the striatal direct pathway MSNs, which may  
383 prevent the overactivation of this pathway in LID. Altogether, these results indicate a

384 widespread normalization in the cerebello-striato-cortical motor system and suggest

385 that the cerebellar stimulations act on core mechanisms of LID.

386



387 **DISCUSSION**

388

389 We used optogenetic stimulations, extracellular recordings, and chemogenetic  
390 inhibition to investigate the role of PC in CrusII, the orolingual region of the  
391 cerebellum, in the alleviation of orolingual levodopa-induced dyskinesia (LID).  
392 Previous clinical studies found a reduction of LID severity using cerebellar rTMS in  
393 PD patients<sup>17, 19, 20, 59</sup>. However, the precise mechanisms, pathways and cell-types  
394 responsible for this beneficial effect remained unknown. In the present study, we first  
395 show that CrusII PC opto-stimulations correct, or even prevent, severe orolingual  
396 dyskinesia exhibited by chronically levodopa-treated PD mice. These results are the  
397 first to demonstrate a direct involvement of PC in the anti-dyskinetic effect of the  
398 cerebellum. Strikingly, this beneficial effect led to complete alleviation of orolingual  
399 dyskinesia and thus was stronger than observed in patients where rTMS was applied  
400 bilaterally over the hemispheres of the cerebellum<sup>18, 19</sup>. However, the effect of rTMS  
401 on cerebellum is not yet well understood: rTMS may only indirectly activate PC and  
402 its efficacy may be constrained by the difficulty to target the optimal depths of the  
403 cerebellar cortex<sup>78</sup>. Interestingly, we found that the beneficial effect of cerebellar  
404 stimulations in CrusII, which hosts dense projections from the orolingual area<sup>54</sup>, is  
405 mainly observed on the orolingual LID, suggesting a correspondence between the  
406 cerebellar somatotopy and functional impact of cerebellar stimulation. Similarly,  
407 different subtypes of LID are associated with different patterns of striatal FosB/ $\Delta$ FosB  
408 expression levels, consistent with striatal somatotopy<sup>38</sup>. The efficacy of cerebellar  
409 rTMS in patients should thus strongly depend on the site of stimulation. Cerebellar  
410 rTMS have been reported to induce changes within the cerebellar cortex<sup>79</sup>. However,  
411 our work demonstrates a normalization of the neuronal activity in a wide motor  
412 network following stimulations, reveals a contribution of the cerebello-thalamo-striatal

413 pathway in mediating the effect of PC stimulations, and shows that it normalizes the  
414 expression of striatal FosB/ $\Delta$ FosB causally linked to LID. Overall, our results indicate  
415 that PC stimulations exert long-range effects and act on core mechanisms of LID  
416 outside of the cerebellum

417 Our study further characterizes the alterations occurring in the cerebello-thalamo-  
418 cortical and cerebello-thalamo-striatal pathways during dyskinesia. The increased  
419 activity of the primary motor cortex in LID observed in our study is consistent with  
420 previous findings in rodents and humans<sup>21, 24</sup>. M1 (and also the subthalamic nucleus  
421 which is overactive in PD) reaches DCN and the cerebellar cortex through the  
422 pontine nuclei<sup>48, 80, 81</sup>. This observation contrasts with the decreased activity  
423 observed in IN and DN during LID, and may thus reflect compensatory adaptation in  
424 the cerebellum<sup>60</sup>. However, cerebellar nuclei neurons exhibited increased irregularity  
425 discharge, and such cerebellar anomalies have been implicated in other motor  
426 disorders, such as tremor<sup>66</sup>, ataxia<sup>82</sup> and dystonia<sup>64, 65</sup>. The irregular activity found  
427 in cerebellar nuclei neurons could thus contribute to LID. The PF neurons exhibited a  
428 decreased activity as in the cerebellar nuclei; this change could result from a  
429 decreased cerebellar entrainment of PF through the cerebello- parafascicular  
430 connections<sup>51, 83, 84, 85</sup>. Interestingly, our results failed to evidence consistent  
431 modulations in the motor thalamus in LID or following cerebellar stimulations. Overall,  
432 the changes in activity observed in LID are likely inter-dependent since they were all  
433 corrected, or prevented, by the cerebellar stimulations.

434 The cerebellar stimulations produce alternate periods of silence and increased  
435 “rebound” activity in DCN<sup>86</sup>. Previous evidence demonstrated that this rebound  
436 activation is propagated in the forebrain motor network<sup>71</sup>. The chemogenetic  
437 inhibition of the cerebello-parafascicular neurons reduced the beneficial impact of

438 cerebellar stimulations suggesting an important contribution of the cerebello-thalamo-  
439 striatal pathway. Examination of the collaterals of these neurons revealed only sparse  
440 collaterals to the motor thalamus suggesting a primary role of the thalamostriatal over  
441 thalamocortical projections. The striatum is indeed playing a core role in LID  
442 generation notably through the overactivity of the direct pathway within the striatum  
443 <sup>11, 13, 15</sup>. This overactivity could result from an excessive potentiation at the  
444 corticostriatal synapses of direct pathway neurons <sup>14, 43</sup>. Interestingly, we found that  
445 preventive cerebellar stimulations converted the corticostriatal LTP into LTD in direct  
446 pathway MSNs in LID mice. This suggests that these stimulations promoted  
447 corticostriatal LTD over LTP in the direct pathway and may therefore circumvent the  
448 excessive potentiation occurring in LID <sup>43</sup>. We also found upregulation of striatal  
449 FosB/ $\Delta$ FosB in LID, consistent with previous studies <sup>35, 36, 38, 40</sup>. Since FosB/ $\Delta$ FosB  
450 overexpression suffices to trigger LID, the normalization of striatal FosB/ $\Delta$ FosB levels  
451 by cerebellar stimulations may explain the suppression of LID. FosB/ $\Delta$ FosB has been  
452 shown to be mainly expressed in D1-expressing striatal neurons <sup>30, 36, 38</sup>, suggesting  
453 that cerebellar stimulations can modulate transcriptional activity in D1-MSNs,  
454 probably through projections of IN to PF and the striatum <sup>85</sup>. These changes of  
455 transcriptional activities might also be responsible for the change in corticostriatal  
456 plasticity observed in our study. Overall, these results show that our protocol of  
457 cerebellar stimulations induce profound changes in the striatal function. Moreover,  
458 the persistence of the beneficial effects of this protocol after its end indicates that it  
459 recruits a long-term plasticity that could be harnessed for the improvement of LID in  
460 PD patients.

461 Consistent with our finding that cerebellar stimulations may exert a transient  
462 therapeutic effect, stimulations of the output pathway of the cerebellum have been

463 recently shown to reduce tremor and ataxia <sup>66, 87</sup>. Therefore, improving the  
464 experimental approaches aimed at stimulating cerebellar Purkinje cells or cerebellar  
465 nuclei neurons may benefit to multiple motor disorders. Finally, our work confirms the  
466 necessity to study LID as a network disorder involving abnormal signaling between  
467 the basal ganglia, cerebral cortex, thalamus and cerebellum <sup>16, 44</sup>.  
468

469 **METHODS**

470

471 **Animals and protocol**

472 L7-ChR2;WT mice<sup>52</sup> were used for *in vivo* experiments, L7-ChR2;Drd2-GFP mice  
473 were used for *ex vivo* experiments. Animals were housed 1-3 per cage on a standard  
474 12-hour light/dark cycle with *ad libitum* access to water and food. All behavioral  
475 manipulations took place during the light phase. All experiments were performed on  
476 mice aged 6-9 weeks, of either sex (35-45g), from the Institut de Biologie de l'Ecole  
477 Normale Supérieure, Paris, France and in accordance with the recommendations  
478 contained in the European Community Council Directives. All animals followed a 9 to  
479 10-weeks experimental protocol. After surgical intervention, mice were carefully  
480 monitored during 1-1.5 weeks following a nursing protocol adapted from<sup>88</sup> to reduce  
481 post-surgery lethality. After 3 weeks, animals received daily intraperitoneal (I.P)  
482 injections of L3,4-dihydroxyphenylalanine methyl (L-DOPA, 3 day at 3mg/kg, then  
483 6mg/kg, Sigma-Aldrich) and the peripheral DOPA decarboxylase inhibitor  
484 bensezaride hydrochloride (12mg/kg, Sigma-Aldrich) for 6 weeks (0.1mL/10g body  
485 weight). Animals were separated into 4 groups: LID\_PREV, received daily theta-  
486 rhythm cerebellar “preventive” stimulations from the first day of levodopa  
487 administration, LID\_CORR, received daily theta-rhythm cerebellar “corrective”  
488 stimulations after 2 weeks of L-DOPA injections, LID, received daily L-DOPA  
489 injections alone, and control SHAM mice, received daily L-DOPA and either no  
490 stimulations or preventive or corrective theta-rhythm cerebellar stimulations.  
491 Cerebellar stimulations were stopped simultaneously in all the groups and the last  
492 two weeks were assessed for long-term anti-dyskinetic effects. Every week, mice  
493 were behaviorally monitored (see below).

494

## 495 **Surgical procedures**

496 All surgical procedures were performed at 6-9 weeks of age. After subcutaneous  
497 (S.C) administration of buprenorphine (0.06mg/kg), animals were anesthetized with  
498 isoflurane (3%) and maintained with 0.5%-1.0% inhaled isoflurane. Mice were placed  
499 in a stereotaxic frame (David Kopf Instruments, USA) and pretreated with  
500 desipramine (25 mg/kg, I.P) (Sigma-Aldrich). Small holes were drilled over the left  
501 medial forebrain bundle (MFB: -1.2 AP, 1.3 ML, -3.75 mm DV) and either over the left  
502 oral motor cortex (M1: +2.2 AP, -2.2 ML, -1.5 mm DV), the left parafascicular nucleus  
503 (PF: -2.3 AP, -0.75 ML, -3.5 mm DV), and the left ventroanterior-ventrolateral  
504 complex of the thalamus (VAL: -1.40 AP, -1.40 ML, -3.50 mm DV) or over the right  
505 fastigial nucleus (FN: -6.4 AP, +0.85 ML, -3.25 mm DV), interposed nucleus (IN: -6.4  
506 AP, +1.6 ML, -3.25 mm DV), and dentate nucleus (DN: -6.2 AP, +2.3 ML, -3.3 mm  
507 DV). The left MFB was injected with either 1 $\mu$ L of 6-Hydroxydopamine hydrochloride  
508 (6-OHDA, (Sigma-Aldrich) 3.2 $\mu$ g/ $\mu$ L free-base in a 0.02% ascorbic acid solution  
509 (Sigma-Aldrich)) (for the parkinsonian animals) or 1 $\mu$ L vehicle (ascorbic acid for  
510 control animals) at a rate of 0.1 $\mu$ L/min, after which the syringe was left in place for  
511 10min. An additional hole was drilled over the left cerebellum for placement of a skull  
512 screw (INOX A2, Bossard) coupled to the ground wire. A final craniectomy centered  
513 over the left Crus II (-6.3 to -7.3 mm AP, +3.0 to +4.2 mm ML) was performed,  
514 without removing the dura to prevent damage to the cerebellar cortex. A 2.88 mm<sup>2</sup>  
515 LED (SMD chip LED lamp, Kingbright, USA) was then cement to the skull over Crus  
516 II. Recording electrodes were slowly lowered through the craniectomy at the wanted  
517 coordinates. The ground wire was clipped to the recording board using pins (Small  
518 EIB pins, Neuralynx, Dublin, Ireland) and the entire recording device was secured

519 with dental cement (Metabond) and dental acrylic (Pi-Ku-Plast HP 36, monomer and  
520 polymer, Bredent, Germany).

521 All animals were given anti-inflammatory Metacam S.C (Metacam 2mg/mL,  
522 Boehringer Ingelheim) for postoperative analgesia and sterile glucose-saline  
523 solutions S.C<sup>88</sup> (Glucose 5%, Osalia). Parkinsonian animals were closely monitored  
524 for 1-1.5 weeks following surgery, if needed mouse cages were kept on a heating  
525 pad, animals received several glucose-saline injections daily and were fed a mixt of  
526 bledine (Blédina, Danone, France) and concentrated milk.

527

## 528 **Behavior**

### 529 *Open field*

530 Animals were monitored in a 38cm diameter open field (Noldus, The Netherlands)  
531 once a week for 5 min during 9 weeks. The mice were monitored with a camera  
532 (Allied Vision Prosilica GigE GC650, Stemmer Imaging) placed directly above to  
533 assess periods of inactivity/activity. The video acquisition was made at 25 Hz  
534 frequency and at a resolution of 640 by 480 pixels. DeepLabCut method was used  
535 for the analysis of locomotor activity. Seven points of interest were labeled: nose, left  
536 ear, right ear, basis of tail, end of tail, red led of the headstage, green led of the  
537 headstage. Labels were manually applied to the desired points on 500 frames. The  
538 position of the mouse head has been reconstructed from the barycenter of the points:  
539 nose, left ear, right ear, red led of the headstage, green led of the headstage  
540 weighted by their likelihood. Then, to this head's trajectory, a cubic smoothing spline  
541 fit was applied. For the analysis of locomotion, the periods of activity were isolated  
542 from the periods of inactivity by thresholding the speed of the head point at 1cm/s.

### 543 *AIMs assessment*

544 After a 3-weeks pre-L-DOPA phase, daily IP injections of levodopa begun. In rodent  
545 models of LID, abnormal involuntary movements (AIMs) are considered the  
546 behavioral and mechanistic equivalent of LID in PD patients<sup>14, 53</sup>. To assess AIMs in  
547 our mouse model, a modified scale was used<sup>53</sup>. Each mouse was placed in a glass  
548 cylinder surrounded by 2 mirrors to detect AIMs in every angle and was recorded with  
549 a video camera (Allied Vision Prosilica GigE GC650, Stemmer Imaging) for 4 minutes  
550 every 20 minutes over a 2-hours period, starting 20 minutes before L-DOPA injection.  
551 *Post-hoc* scoring was performed for 2 minutes every 20 minutes. The mice were then  
552 evaluated a total of 8 times during the whole recording. Movements were identified as  
553 dyskinetic only when they were repetitive, affected the side of the body contralateral  
554 to the lesion, and could be clearly distinguished from naturally occurring behaviors  
555 such as grooming, sniffing, rearing, and gnawing. Specifically, AIMs were classified  
556 into three categories based on their topographic distribution: axial, forelimb, and  
557 orolingual. Forelimb dyskinesia are defined as hyperkinetic and/or dystonic  
558 movements of the contralateral forelimb on the sagittal or frontal plane. Axial AIMs  
559 are considered a twisted posture of the neck and upper body towards the side  
560 contralateral to the lesion. Finally, orolingual AIMs are defined as repetitive and  
561 empty chewing movements of the jaw, with or without tongue protrusion. Each  
562 subtype of AIMs were scored on a severity scale from 0 to 4 where: 0 = absent; 1 =  
563 occasional occurrence, less than half of the observation period; 2 = frequent  
564 occurrence, more than half of the observation time; 3 = continuous but interrupted by  
565 sensory stimuli; and 4 = continuous and not suppressible by sensory distraction<sup>53</sup>.  
566 AIM scores were averaged per time point or per session. Non-parametric Kruskal-  
567 Wallis test with pairwise Wilcoxon test and a Benjamini & Hochberg correction were



568 used to compared the average scores across time and between conditions for peak-  
569 dose and average off-period dyskinesia scores.

570

### 571 **Optogenetic stimulations**

572 To stimulate PC on Crus II cerebellar cortex, 3 micro LEDs (1.6x0.6 mm, SMD chip  
573 LED lamp, Kingbright, USA) emitting blue light with a dominant 458nm wavelength,  
574 were soldered together to cover the full extent of the stimulated area. A small piece of  
575 coverslip glass was glued to the bottom of the LEDs to prevent heat brain damage.  
576 Two insulated power wires were connecting the LEDs to allow connection with a  
577 stimulating cable (New England Wire Technologies, Lisbon) coupled to a LED driver  
578 (Universal LED Controler, Mightex). Stimulated mice (LID\_PREV, LID\_CORR and  
579 appropriate controls) received daily train of 20ms theta-rhythm stimulations delivered  
580 at 8.33 Hz and at 16mW/mm<sup>2</sup> irradiance for 2x40seconds separated by a 2 minutes  
581 period every day 30 minutes after L-DOPA injection as used in <sup>19, 89, 90</sup>.

### 582 ***In vivo* freely moving chronic recordings**

583 To record cell activity, we used bundles of electrodes consisting of nichrome wire  
584 (0.005 inches diameter, Kanthal RO-800) folded and twisted into bundles of 4-8  
585 electrodes. Prior to surgical intervention, the bundles were pinned to an electrode  
586 interface board (EIB-16; Neuralynx, Dublin, Ireland) according to the appropriate  
587 coordinates of the targeted structures. The microwires of each bundle were  
588 connected to the EIB-16 with gold pins (Neuralynx, Dublin, Ireland). The entire  
589 recording device was secured by dental cement. The impedance of every electrode  
590 was set to 200-500 kΩ using gold-plating (Cyanure-free gold solution, Sifco, France).  
591 Electrical signals were acquired using a headstage and amplifier from TDT (RZ2,  
592 RV2, Tucker-Davis Technologies, Alachya, FL, USA), filtered, amplified, and

593 recorded on Synapse System (Tucker-Davis Technologies, Alachua, FL, USA). Spike  
594 waveform were filtered at 3 Hz low-pass and 8000 Hz high-pass and digitized at 25  
595 kHz. The experimenter manually set a threshold for storage and visualization of  
596 electrical events.

597 During recording sessions, after a 5-minutes open field and a 20-minutes recording  
598 baseline, L-DOPA (3-6 mg/kg) was injected IP and pontaneous activity was recorded  
599 for 1h30 and stimulated using a LED driver (Universal LED Controler, Mightex), an  
600 automatized commutator (ACO32 SYS3-32-CH motorized commutator, Tucker-Davis  
601 Technologies, Alachua, FL, USA), and controlled by TTL pulses from our behavioral  
602 monitoring system (RV2, Tucker-Davis Technologies, Alachua, FL, USA). At the end  
603 of recording sessions, animals were detached and returned to their home cages.

604 Single units were identified offline by manual spike sorting performed on Matlab  
605 (Mathworks, Natick, MA, USA) scripts based on k-means clustering on principle  
606 component analysis (PCA) of the spike waveforms<sup>91</sup>. One cluster was considered to  
607 represent a single-unit if the unit's spike waveform was different from other units on  
608 the same wire, in 3D PCA space. The unit's firing activity was analyzed from all  
609 structures. No statement is made whether the same cells were recorded across the  
610 9-weeks session. For display purposes, the firing rate of single units was averaged  
611 per condition and per group of weeks using boxplots. Boxplots show the median rate  
612 in Hz, represented by horizontal bars, over 4 categories of weeks: first boxplot  
613 represents the 2<sup>nd</sup> and 3<sup>rd</sup> week of the protocol (pre-L-DOPA), second boxplot  
614 represents the 4<sup>th</sup> and 5<sup>th</sup> weeks when levodopa treatment has started as well as  
615 cerebellar stimulations for preventive mice, third boxplot represents the 6<sup>th</sup> and 7<sup>th</sup>  
616 weeks when corrective mice start receiving cerebellar stimulations, the last boxplot  
617 represents the 8<sup>th</sup> and 9<sup>th</sup> weeks of the protocol when stimulations stop and long-term

618 effects of cerebellar stimulations are visible. Welch Anova with Games Howell post-  
619 hoc test or one-way Anova's with Tukey post-hoc test were performed based the  
620 results of Levene test to compared the averaged firing rate between conditions in  
621 DCN whereas linear model ANOVA with the mice randomly distributed and Tukey's  
622 Post-Hoc test were performed to compared the averaged firing rate between  
623 conditions in M1, PF, and VAL.

624

### 625 **Neuroanatomical tracing**

626 Mice were injected with 100nL of retrograde AAV-Syn-eGFP (Titer:  $1 \times 10^{13}$  GC/mL,  
627 Lot#V16600, Addgene) in PF (N=6). For synaptophysin labeling and axon collaterals,  
628 70nL of AAV8.2-hEF1a-DIO-synaptophysin-GFP (Titer:  $2.19 \times 10^{13}$  GC/mL,  
629 Massachusetts General Hospital) together with 50 nL of  
630 AAV1.CAG.Flex.tdTomato.WPRE.bGH (Titer:  $7.8 \times 10^{13}$  GC/mL, Lot #CS0923, Upenn  
631 Vector) were injected in IN, DN, and FN, in combination with 150nL of retrograde  
632 AAV-Cre-EBFP (Titer:  $1 \times 10^{13}$  GC/mL, Lot #V15413, Addgene) injection in PF. Mice  
633 were perfused (see below) 15-25 days after injections to allow the expression of the  
634 AAVs. Brains were sliced entirely at 90  $\mu$ m using a vibratome (Leica VT 1000S), and  
635 mounted on gelatin-coated slides, dried and then coverslipped with Mowiol (Sigma).  
636 Slices were analyzed and imaged using a confocal microscope (SP8, Leica), and  
637 images were edited and analyzed using FIJI/ImageJ.

638

### 639 **Chemogenetic experiment**

640 Mice were injected with inhibitory DREADDs pAAV8-hSyn-DIO-hM4DimCherry (Titer:  
641  $2.9 \times 10^{13}$  GC/mL, Vol: 100 $\mu$ L, Lot: v54499; Addgene) in IN, DN, and FN (150nL per  
642 nucleus)contralaterally-to-the-lesion, in complementation with 300nL CAV2-Cre-GFP

643 (Titer:  $6.4 \times 10^{12}$ , dilution 1/10, Plateforme de Vectorologie de Montpellier) viral  
644 infusion in ipsilateral-to-the-lesion PF. CAV2-Cre-GFP injections' surgeries were  
645 performed 1 week before the injections of pAAV-hSyn-DIO-hM4DimCherry and the  
646 MFB lesion. After 3 weeks, to allow good expression of the viruses and to reproduce  
647 our Parkinsonian model, the animals start the levodopa treatment for 6 weeks and  
648 the cerebellar stimulations for 4 weeks (LID\_PREV). The severity of their orolingual  
649 LID was scored 40 minutes after levodopa injection (at the peak dose) and right after  
650 cerebellar stimulation. Scores were averaged across the 4 weeks of preventive  
651 stimulations. For neuronal modulation of animals expressing DREADDs, Clozapine  
652 N-oxide (1.25 mg/kg, Tocris Bioscience) was diluted in saline and injected I.P 10min  
653 prior L-DOPA. Control group is injected with saline.

654

### 655 **Perfusion, Immunohistochemistry, Microscopy, and Cell counting**

656 Mice were anesthetized with ketamine/xylazine I.P and transcardially perfused with  
657 4% paraformaldehyde in PBS (Formalin solution, neutral buffer 10%, Sigma-Aldrich).  
658 Brains were dissected and post-fixed for 24h in 4% PFA, 24h in 20% sucrose (Merck)  
659 and 24h in 30% sucrose. Coronal 20 $\mu$ m sections were cut using a freezing  
660 microtome (Leica) and mounted on Superfrost glass slides (Superfrost Plus, Thermo  
661 Fisher) for imaging.

662 For immunohistochemistry, the tissue was blocked with 3% normal donkey serum  
663 (NDS, JacksonImmunoResearch) or normal goat serum (NGS,  
664 JacksonImmunoResearch) and permeabilized with 0.1% Triton X-100 (Sigma-  
665 Aldrich) for 2 hours at room temperature on a shaker. Primary antibodies: Guinea pig  
666 anti-TH (Synaptic System, 1:500) and Rabbit anti-FosB (Santa Cruz, 1:100) were  
667 added to 1% NDS or NGS and incubated overnight at 4°C on a shaker. Secondary

668 antibodies: donkey anti-Guinea Pig Cy3 (JacksonImmunoResearch, 1:400) and goat  
669 anti-Rabbit Alexa 488 (JacksonImmunoResearch, 1: 200) were added in 1%  
670 NDS/NGS for 2 hours at room temperature on a shaker. The slices were then  
671 washed, incubated with Hoechst (Invitrogen, ThermoFisher scientific, 1:10 000), and  
672 mounted onto slides for visualization and imaging. The color reaction was acquired  
673 under a dissecting microscope (Leica) and 5, 20, 40 or 64x images were taken. For  
674 FosB/ $\Delta$ FosB quantification, images were taken using confocal microscope (SP8,  
675 Leica) with 40x objective. Exposure time were matched between images of the same  
676 type. Individual images were stitched together to produce an entire coronal image of  
677 both striatum. FIJI/ImageJ software was used to count cells using manual counting.  
678 Student t-test was used for statistics. The extend of the dopaminergic lesion was  
679 quantified using an optical density analysis on TH staining between the two striatum.  
680 Mean density of fluorescence of each striatum was normalized on the mean density  
681 of fluorescence of the ipsilateral corpus collasum. Only animals with >50% dopamine  
682 depletion were included in this study.

683

#### 684 **Ex vivo whole-cell patch-clamp electrophysiology**

685 SHAM, SHAM\_PREV, LID, and LID\_PREV mice were anaesthetized using  
686 isoflurane and their brain removed from the skull. Horizontal striatal slices (270  $\mu$ m-  
687 thick), containing the dorsal lateral striatum, were cut using a VT1000S vibratome  
688 (VT1000S, Leica Microsystems, Nussloch, Germany) in ice-cold oxygenated solution  
689 (ACSF: 125 mM NaCl, 2.5 mM KCl, 25 mM glucose, 25 mM NaHCO<sub>3</sub>, 1.25 mM  
690 NaH<sub>2</sub>PO<sub>4</sub>, 2 mM CaCl<sub>2</sub>, 1 mM MgCl<sub>2</sub>, 1 mM pyruvic acid). Slices were then  
691 incubated at 32–34°C for 60 minutes before returning to room temperature in holding  
692 ACSF. For whole-cell recordings, borosilicate glass pipettes of 4–8 M $\Omega$  resistance

693 were filled with a potassium gluconate-based internal solution consisting of (in mM):  
694 122 K-gluconate, 13 KCl, 10 HEPES, 10 phosphocreatine, 4 Mg-ATP, 0.3 Na-GTP,  
695 0.3 EGTA (adjusted to pH 7.35 with KOH, osmolarity  $296 \pm 3.8$  mOsm). Signals were  
696 amplified using with EPC10–2 amplifiers (HEKA Elektronik, Lambrecht, Germany). All  
697 recordings were performed at 32–34°C, using a temperature control system (Bath-  
698 controller V, Luigs&Neumann, Ratingen, Germany) and slices were continuously  
699 superfused with extracellular solution at a rate of 2 ml/min. Recordings were sampled  
700 at 10 kHz, using the Patchmaster v2x32 program (HEKA Elektronik). D2<sup>+</sup>-MSNs  
701 were visualized under direct interference contrast with an upright BX51WI  
702 microscope (Olympus, Japan), with a 40x water immersion objective combined with  
703 an infra-red filter, a monochrome CCD camera (Roper Scientific, The Netherlands)  
704 and a compatible system for analysis of images as well as contrast enhancement.

705 Spike-timing-dependent plasticity (STDP) protocols of stimulations were performed  
706 with one concentric bipolar electrode (Phymep, Paris, France; FHC, Bowdoin, ME)  
707 placed in the layer 5 of the somatosensory cortex while whole-cell recording MSN in  
708 the dorsolateral striatum. Electrical stimulations were monophasic, at constant  
709 current (ISO-Flex stimulators, AMPI, Jerusalem, Israel). Currents were adjusted to  
710 evoke 100–300 pA EPSCs. STDP protocols consisted of pairings of post- and  
711 presynaptic stimulations separated by a specific time interval (~20 ms); pairings  
712 being repeated at 1 Hz. The postsynaptic stimulation of an action potential evoked by  
713 a depolarizing current step (30 ms duration) in the recorded MSN preceded the  
714 presynaptic cortical stimulation, in a post-pre pairing paradigm. Post–pre pairings  
715 was repeated 100 times at 1 Hz (**Figure 6a1**). Recordings on neurons were made  
716 over a period of 10 minutes at baseline, and for at least 40 minutes after the STDP  
717 protocols; long-term changes in synaptic efficacy were measured in the last 10

718 minutes. Experiments were excluded if the mean input resistance ( $R_i$ ) varied by more  
719 than 20% through the experiment. Off-line analysis was performed with Fitmaster  
720 (HEKA Elektronik), IGOR Pro 6.0.3 (WaveMetrics, Lake Oswego, OR, USA).  
721 Statistical analyses were performed with Prism 7.00 software (San Diego, CA, USA).  
722 All results are expressed as mean  $\pm$  SEM. Statistical significance was assessed in  
723 one-sample t tests, unpaired t tests as appropriate, using the indicated significance  
724 threshold ( $p$ ).

725



726 **References:**

- 727 1. Ahlskog JE, Muenter MD. Frequency of levodopa-related dyskinesias and motor  
728 fluctuations as estimated from the cumulative literature. *Mov Disord* **16**, 448-458  
729 (2001).
- 730  
731 2. Aquino CC, Fox SH. Clinical spectrum of levodopa-induced complications. *Mov*  
732 *Disord* **30**, 80-89 (2015).
- 733  
734 3. Alonso-Frech F, *et al.* Slow oscillatory activity and levodopa-induced dyskinesias in  
735 Parkinson's disease. *Brain* **129**, 1748-1757 (2006).
- 736  
737 4. Guerra A, *et al.* Abnormal cortical facilitation and L-dopa-induced dyskinesia in  
738 Parkinson's disease. *Brain Stimul* **12**, 1517-1525 (2019).
- 739  
740 5. Kishore A, *et al.* Cerebellar sensory processing alterations impact motor cortical  
741 plasticity in Parkinson's disease: clues from dyskinetic patients. *Cereb Cortex* **24**,  
742 2055-2067 (2014).
- 743  
744 6. Wu YR, Levy R, Ashby P, Tasker RR, Dostrovsky JO. Does stimulation of the GPi  
745 control dyskinesia by activating inhibitory axons? *Mov Disord* **16**, 208-216 (2001).
- 746  
747 7. Beck G, *et al.* Role of striatal DeltaFosB in L-Dopa-induced dyskinesias of  
748 parkinsonian nonhuman primates. *Proc Natl Acad Sci U S A* **116**, 18664-18672  
749 (2019).
- 750  
751 8. Guigoni C, Doudnikoff E, Li Q, Bloch B, Bezard E. Altered D(1) dopamine receptor  
752 trafficking in parkinsonian and dyskinetic non-human primates. *Neurobiol Dis* **26**, 452-  
753 463 (2007).
- 754  
755 9. Guigoni C, *et al.* Involvement of sensorimotor, limbic, and associative basal ganglia  
756 domains in L-3,4-dihydroxyphenylalanine-induced dyskinesia. *J Neurosci* **25**, 2102-  
757 2107 (2005).
- 758  
759 10. Heimer G, Rivlin-Etzion M, Bar-Gad I, Goldberg JA, Haber SN, Bergman H.  
760 Dopamine replacement therapy does not restore the full spectrum of normal pallidal  
761 activity in the 1-methyl-4-phenyl-1,2,3,6-tetra-hydropyridine primate model of  
762 Parkinsonism. *J Neurosci* **26**, 8101-8114 (2006).
- 763  
764 11. Girasole AE, *et al.* A Subpopulation of Striatal Neurons Mediates Levodopa-Induced  
765 Dyskinesia. *Neuron* **97**, 787-795 e786 (2018).
- 766  
767 12. Meissner W, *et al.* Increased slow oscillatory activity in substantia nigra pars reticulata  
768 triggers abnormal involuntary movements in the 6-OHDA-lesioned rat in the presence  
769 of excessive extracellular striatal dopamine. *Neurobiol Dis* **22**, 586-598 (2006).

- 770  
771 13. Parker JG, *et al.* Diametric neural ensemble dynamics in parkinsonian and dyskinetic  
772 states. *Nature* **557**, 177-182 (2018).
- 773  
774 14. Picconi B, *et al.* Loss of bidirectional striatal synaptic plasticity in L-DOPA-induced  
775 dyskinesia. *Nat Neurosci* **6**, 501-506 (2003).
- 776  
777 15. Ryan MB, Bair-Marshall C, Nelson AB. Aberrant Striatal Activity in Parkinsonism and  
778 Levodopa-Induced Dyskinesia. *Cell Rep* **23**, 3438-3446 e3435 (2018).
- 779  
780 16. Cenci MA, Jorntell H, Petersson P. On the neuronal circuitry mediating L-DOPA-  
781 induced dyskinesia. *J Neural Transm (Vienna)* **125**, 1157-1169 (2018).
- 782  
783 17. Brusa L, *et al.* Metabolic changes induced by theta burst stimulation of the cerebellum  
784 in dyskinetic Parkinson's disease patients. *Parkinsonism Relat Disord* **18**, 59-62  
785 (2012).
- 786  
787 18. Kishore A, Meunier S, Popa T. Cerebellar influence on motor cortex plasticity:  
788 behavioral implications for Parkinson's disease. *Front Neurol* **5**, 68 (2014).
- 789  
790 19. Koch G, *et al.* Cerebellar magnetic stimulation decreases levodopa-induced  
791 dyskinesias in Parkinson disease. *Neurology* **73**, 113-119 (2009).
- 792  
793 20. Sanna A, *et al.* Cerebellar continuous theta burst stimulation reduces levodopa-  
794 induced dyskinesias and decreases serum BDNF levels. *Neurosci Lett* **716**, 134653  
795 (2020).
- 796  
797 21. Rascol O, *et al.* Cortical motor overactivation in parkinsonian patients with L-dopa-  
798 induced peak-dose dyskinesia. *Brain* **121 ( Pt 3)**, 527-533 (1998).
- 799  
800 22. Morgante F, Espay AJ, Gunraj C, Lang AE, Chen R. Motor cortex plasticity in  
801 Parkinson's disease and levodopa-induced dyskinesias. *Brain* **129**, 1059-1069  
802 (2006).
- 803  
804 23. Lindenbach D, Conti MM, Ostrock CY, Dupre KB, Bishop C. Alterations in primary  
805 motor cortex neurotransmission and gene expression in hemi-parkinsonian rats with  
806 drug-induced dyskinesia. *Neuroscience* **310**, 12-26 (2015).
- 807  
808 24. Halje P, Tamte M, Richter U, Mohammed M, Cenci MA, Petersson P. Levodopa-  
809 induced dyskinesia is strongly associated with resonant cortical oscillations. *J*  
810 *Neurosci* **32**, 16541-16551 (2012).
- 811  
812 25. Gradinaru V, Mogri M, Thompson KR, Henderson JM, Deisseroth K. Optical  
813 deconstruction of parkinsonian neural circuitry. *Science* **324**, 354-359 (2009).
- 814

- 815 26. Valverde S, *et al.* Deep brain stimulation-guided optogenetic rescue of parkinsonian  
816 symptoms. *Nat Commun* **11**, 2388 (2020).
- 817  
818 27. Popa T, *et al.* Cerebellar processing of sensory inputs primes motor cortex plasticity.  
819 *Cereb Cortex* **23**, 305-314 (2013).
- 820  
821 28. Picazio S, Koch G. Is motor inhibition mediated by cerebello-cortical interactions?  
822 *Cerebellum* **14**, 47-49 (2015).
- 823  
824 29. Ferrucci R, *et al.* Cerebellar and Motor Cortical Transcranial Stimulation Decrease  
825 Levodopa-Induced Dyskinesias in Parkinson's Disease. *Cerebellum* **15**, 43-47 (2016).
- 826  
827 30. Spigolon G, Fisone G. Signal transduction in L-DOPA-induced dyskinesia: from  
828 receptor sensitization to abnormal gene expression. *J Neural Transm (Vienna)* **125**,  
829 1171-1186 (2018).
- 830  
831 31. Jenner P. Molecular mechanisms of L-DOPA-induced dyskinesia. *Nat Rev Neurosci*  
832 **9**, 665-677 (2008).
- 833  
834 32. Lindgren HS, *et al.* Putaminal upregulation of FosB/DeltaFosB-like immunoreactivity  
835 in Parkinson's disease patients with dyskinesia. *J Parkinsons Dis* **1**, 347-357 (2011).
- 836  
837 33. Doucet JP, *et al.* Chronic alterations in dopaminergic neurotransmission produce a  
838 persistent elevation of deltaFosB-like protein(s) in both the rodent and primate  
839 striatum. *Eur J Neurosci* **8**, 365-381 (1996).
- 840  
841 34. Berton O, *et al.* Striatal overexpression of DeltaJunD resets L-DOPA-induced  
842 dyskinesia in a primate model of Parkinson disease. *Biol Psychiatry* **66**, 554-561  
843 (2009).
- 844  
845 35. Bastide MF, *et al.* Immediate-early gene expression in structures outside the basal  
846 ganglia is associated to L-DOPA-induced dyskinesia. *Neurobiol Dis* **62**, 179-192  
847 (2014).
- 848  
849 36. Fieblinger T, *et al.* Striatonigral neurons divide into two distinct morphological-  
850 physiological phenotypes after chronic L-DOPA treatment in parkinsonian rats. *Sci*  
851 *Rep* **8**, 10068 (2018).
- 852  
853 37. Pavon N, Martin AB, Mendialdua A, Moratalla R. ERK phosphorylation and FosB  
854 expression are associated with L-DOPA-induced dyskinesia in hemiparkinsonian  
855 mice. *Biol Psychiatry* **59**, 64-74 (2006).
- 856  
857 38. Andersson M, Hilbertson A, Cenci MA. Striatal fosB expression is causally linked with  
858 L-DOPA-induced abnormal involuntary movements and the associated upregulation of

- 859 striatal prodynorphin mRNA in a rat model of Parkinson's disease. *Neurobiol Dis* **6**,  
860 461-474 (1999).
- 861  
862 39. Cenci MA, Tranberg A, Andersson M, Hilbertson A. Changes in the regional and  
863 compartmental distribution of FosB- and JunB-like immunoreactivity induced in the  
864 dopamine-denervated rat striatum by acute or chronic L-dopa treatment.  
865 *Neuroscience* **94**, 515-527 (1999).
- 866  
867 40. Cao X, *et al.* Striatal overexpression of DeltaFosB reproduces chronic levodopa-  
868 induced involuntary movements. *J Neurosci* **30**, 7335-7343 (2010).
- 869  
870 41. Engeln M, *et al.* Selective Inactivation of Striatal FosB/DeltaFosB-Expressing  
871 Neurons Alleviates L-DOPA-Induced Dyskinesia. *Biol Psychiatry* **79**, 354-361 (2016).
- 872  
873 42. Thiele SL, *et al.* Selective loss of bi-directional synaptic plasticity in the direct and  
874 indirect striatal output pathways accompanies generation of parkinsonism and L-  
875 DOPA induced dyskinesia in mouse models. *Neurobiol Dis* **71**, 334-344 (2014).
- 876  
877 43. Calabresi P, Pisani A, Rothwell J, Ghiglieri V, Obeso JA, Picconi B. Hyperkinetic  
878 disorders and loss of synaptic downscaling. *Nat Neurosci* **19**, 868-875 (2016).
- 879  
880 44. Calabresi P, Standaert DG. Dystonia and levodopa-induced dyskinesias in  
881 Parkinson's disease: Is there a connection? *Neurobiol Dis* **132**, 104579 (2019).
- 882  
883 45. Smith Y, Raju DV, Pare JF, Sidibe M. The thalamostriatal system: a highly specific  
884 network of the basal ganglia circuitry. *Trends Neurosci* **27**, 520-527 (2004).
- 885  
886 46. Caparros-Lefebvre D, Blond S, Feltin MP, Pollak P, Benabid AL. Improvement of  
887 levodopa induced dyskinesias by thalamic deep brain stimulation is related to slight  
888 variation in electrode placement: possible involvement of the centre median and  
889 parafascicularis complex. *J Neurol Neurosurg Psychiatry* **67**, 308-314 (1999).
- 890  
891 47. Alam M, Capelle HH, Schwabe K, Krauss JK. Effect of deep brain stimulation on  
892 levodopa-induced dyskinesias and striatal oscillatory local field potentials in a rat  
893 model of Parkinson's disease. *Brain Stimul* **7**, 13-20 (2014).
- 894  
895 48. Bostan AC, Dum RP, Strick PL. The basal ganglia communicate with the cerebellum.  
896 *Proc Natl Acad Sci U S A* **107**, 8452-8456 (2010).
- 897  
898 49. Chen CH, Fremont R, Arteaga-Bracho EE, Khodakhah K. Short latency cerebellar  
899 modulation of the basal ganglia. *Nat Neurosci* **17**, 1767-1775 (2014).
- 900  
901 50. Hoshi E, Tremblay L, Feger J, Carras PL, Strick PL. The cerebellum communicates  
902 with the basal ganglia. *Nat Neurosci* **8**, 1491-1493 (2005).
- 903

- 904 51. Ichinohe N, Mori F, Shoumura K. A di-synaptic projection from the lateral cerebellar  
905 nucleus to the laterodorsal part of the striatum via the central lateral nucleus of the  
906 thalamus in the rat. *Brain Res* **880**, 191-197 (2000).
- 907  
908 52. Chaumont J, *et al.* Clusters of cerebellar Purkinje cells control their afferent climbing  
909 fiber discharge. *Proc Natl Acad Sci U S A* **110**, 16223-16228 (2013).
- 910  
911 53. Lundblad M, Picconi B, Lindgren H, Cenci MA. A model of L-DOPA-induced  
912 dyskinesia in 6-hydroxydopamine lesioned mice: relation to motor and cellular  
913 parameters of nigrostriatal function. *Neurobiol Dis* **16**, 110-123 (2004).
- 914  
915 54. Apps R, Hawkes R. Cerebellar cortical organization: a one-map hypothesis. *Nat Rev*  
916 *Neurosci* **10**, 670-681 (2009).
- 917  
918 55. Schwarz C, Welsh JP. Dynamic modulation of mossy fiber system throughput by  
919 inferior olive synchrony: a multielectrode study of cerebellar cortex activated by motor  
920 cortex. *J Neurophysiol* **86**, 2489-2504 (2001).
- 921  
922 56. Eriksson T, Magnusson T, Carlsson A, Linde A, Granerus AK. "On-off" phenomenon  
923 in Parkinson's disease: correlation to the concentration of dopa in plasma. *J Neural*  
924 *Transm* **59**, 229-240 (1984).
- 925  
926 57. Putterman DB, Munhall AC, Kozell LB, Belknap JK, Johnson SW. Evaluation of  
927 levodopa dose and magnitude of dopamine depletion as risk factors for levodopa-  
928 induced dyskinesia in a rat model of Parkinson's disease. *J Pharmacol Exp Ther* **323**,  
929 277-284 (2007).
- 930  
931 58. Winkler C, Kirik D, Bjorklund A, Cenci MA. L-DOPA-induced dyskinesia in the  
932 intrastriatal 6-hydroxydopamine model of parkinson's disease: relation to motor and  
933 cellular parameters of nigrostriatal function. *Neurobiol Dis* **10**, 165-186 (2002).
- 934  
935 59. Kishore A, Popa T. Cerebellum in levodopa-induced dyskinesias: the unusual suspect  
936 in the motor network. *Front Neurol* **5**, 157 (2014).
- 937  
938 60. Menardy F, Varani AP, Combes A, Lena C, Popa D. Functional Alteration of  
939 Cerebello-Cerebral Coupling in an Experimental Mouse Model of Parkinson's  
940 Disease. *Cereb Cortex* **29**, 1752-1766 (2019).
- 941  
942 61. Cenci MA, Crossman AR. Animal models of l-dopa-induced dyskinesia in Parkinson's  
943 disease. *Mov Disord* **33**, 889-899 (2018).
- 944  
945 62. Thanvi B, Lo N, Robinson T. Levodopa-induced dyskinesia in Parkinson's disease:  
946 clinical features, pathogenesis, prevention and treatment. *Postgrad Med J* **83**, 384-  
947 388 (2007).

948

- 949 63. Hoebeek FE, *et al.* Increased noise level of purkinje cell activities minimizes impact of  
950 their modulation during sensorimotor control. *Neuron* **45**, 953-965 (2005).
- 951  
952 64. Calderon DP, Fremont R, Kraenzlin F, Khodakhah K. The neural substrates of rapid-  
953 onset Dystonia-Parkinsonism. *Nat Neurosci* **14**, 357-365 (2011).
- 954  
955 65. Fremont R, Tewari A, Khodakhah K. Aberrant Purkinje cell activity is the cause of  
956 dystonia in a shRNA-based mouse model of Rapid Onset Dystonia-Parkinsonism.  
957 *Neurobiol Dis* **82**, 200-212 (2015).
- 958  
959 66. Brown AM, White JJ, van der Heijden ME, Zhou J, Lin T, Sillitoe RV. Purkinje cell  
960 misfiring generates high-amplitude action tremors that are corrected by cerebellar  
961 deep brain stimulation. *Elife* **9**, (2020).
- 962  
963 67. Holt GR, Softky WR, Koch C, Douglas RJ. Comparison of discharge variability in vitro  
964 and in vivo in cat visual cortex neurons. *J Neurophysiol* **75**, 1806-1814 (1996).
- 965  
966 68. Teune TM, van der Burg J, van der Moer J, Voogd J, Ruigrok TJ. Topography of  
967 cerebellar nuclear projections to the brain stem in the rat. *Prog Brain Res* **124**, 141-  
968 172 (2000).
- 969  
970 69. Gornati SV, Schafer CB, Eelkman Rooda OHJ, Nigg AL, De Zeeuw CI, Hoebeek FE.  
971 Differentiating Cerebellar Impact on Thalamic Nuclei. *Cell Rep* **23**, 2690-2704 (2018).
- 972  
973 70. Kelly RM, Strick PL. Cerebellar loops with motor cortex and prefrontal cortex of a  
974 nonhuman primate. *J Neurosci* **23**, 8432-8444 (2003).
- 975  
976 71. Proville RD, *et al.* Cerebellum involvement in cortical sensorimotor circuits for the  
977 control of voluntary movements. *Nat Neurosci* **17**, 1233-1239 (2014).
- 978  
979 72. Mandelbaum G, *et al.* Distinct Cortical-Thalamic-Striatal Circuits through the  
980 Parafascicular Nucleus. *Neuron* **102**, 636-652 e637 (2019).
- 981  
982 73. Feger J, Bevan M, Crossman AR. The projections from the parafascicular thalamic  
983 nucleus to the subthalamic nucleus and the striatum arise from separate neuronal  
984 populations: a comparison with the corticostriatal and corticosubthalamic efferents in  
985 a retrograde fluorescent double-labelling study. *Neuroscience* **60**, 125-132 (1994).
- 986  
987 74. Lanciego JL, Gonzalo N, Castle M, Sanchez-Escobar C, Aymerich MS, Obeso JA.  
988 Thalamic innervation of striatal and subthalamic neurons projecting to the rat  
989 entopeduncular nucleus. *Eur J Neurosci* **19**, 1267-1277 (2004).
- 990  
991 75. Surmeier DJ, Song WJ, Yan Z. Coordinated expression of dopamine receptors in  
992 neostriatal medium spiny neurons. *J Neurosci* **16**, 6579-6591 (1996).
- 993



- 994 76. Fino E, Glowinski J, Venance L. Bidirectional activity-dependent plasticity at  
995 corticostriatal synapses. *J Neurosci* **25**, 11279-11287 (2005).
- 996  
997 77. Paille V, *et al.* GABAergic circuits control spike-timing-dependent plasticity. *J*  
998 *Neurosci* **33**, 9353-9363 (2013).
- 999  
1000 78. Hardwick RM, Lesage E, Miall RC. Cerebellar transcranial magnetic stimulation: the  
1001 role of coil geometry and tissue depth. *Brain Stimul* **7**, 643-649 (2014).
- 1002  
1003 79. Dufor T, *et al.* Neural circuit repair by low-intensity magnetic stimulation requires  
1004 cellular magnetoreceptors and specific stimulation patterns. *Sci Adv* **5**, eaav9847  
1005 (2019).
- 1006  
1007 80. Leergaard TB, Bjaalie JG. Topography of the complete corticopontine projection: from  
1008 experiments to principal Maps. *Front Neurosci* **1**, 211-223 (2007).
- 1009  
1010 81. Sutton AC, O'Connor KA, Piliitsis JG, Shin DS. Stimulation of the subthalamic nucleus  
1011 engages the cerebellum for motor function in parkinsonian rats. *Brain Struct Funct*  
1012 **220**, 3595-3609 (2015).
- 1013  
1014 82. Walter JT, Alvina K, Womack MD, Chevez C, Khodakhah K. Decreases in the  
1015 precision of Purkinje cell pacemaking cause cerebellar dysfunction and ataxia. *Nat*  
1016 *Neurosci* **9**, 389-397 (2006).
- 1017  
1018 83. Aumann TD, Rawson JA, Finkelstein DI, Horne MK. Projections from the lateral and  
1019 interposed cerebellar nuclei to the thalamus of the rat: a light and electron  
1020 microscopic study using single and double anterograde labelling. *J Comp Neurol* **349**,  
1021 165-181 (1994).
- 1022  
1023 84. Fujita H, Kodama T, du Lac S. Modular output circuits of the fastigial nucleus for  
1024 diverse motor and nonmotor functions of the cerebellar vermis. *Elife* **9**, (2020).
- 1025  
1026 85. Xiao L, Bornmann C, Hatstatt-Burkle L, Scheiffele P. Regulation of striatal cells and  
1027 goal-directed behavior by cerebellar outputs. *Nat Commun* **9**, 3133 (2018).
- 1028  
1029 86. Tadayonnejad R, Anderson D, Molineux ML, Mehaffey WH, Jayasuriya K, Turner  
1030 RW. Rebound discharge in deep cerebellar nuclear neurons in vitro. *Cerebellum* **9**,  
1031 352-374 (2010).
- 1032  
1033 87. Miterko LN, *et al.* Neuromodulation of the cerebellum rescues movement in a mouse  
1034 model of ataxia. *Nat Commun* **12**, 1295 (2021).
- 1035  
1036 88. Francardo V, Recchia A, Popovic N, Andersson D, Nissbrandt H, Cenci MA. Impact of  
1037 the lesion procedure on the profiles of motor impairment and molecular



- 1038            responsiveness to L-DOPA in the 6-hydroxydopamine mouse model of Parkinson's  
1039            disease. *Neurobiol Dis* **42**, 327-340 (2011).
- 1040  
1041    89.    Huang YZ, Edwards MJ, Rounis E, Bhatia KP, Rothwell JC. Theta burst stimulation of  
1042            the human motor cortex. *Neuron* **45**, 201-206 (2005).
- 1043  
1044    90.    Suppa A, *et al.* Ten Years of Theta Burst Stimulation in Humans: Established  
1045            Knowledge, Unknowns and Prospects. *Brain Stimul* **9**, 323-335 (2016).
- 1046  
1047    91.    Paz R, Pelletier JG, Bauer EP, Pare D. Emotional enhancement of memory via  
1048            amygdala-driven facilitation of rhinal interactions. *Nat Neurosci* **9**, 1321-1329 (2006).
- 1049  
1050  
1051  
1052

1053

1054 Acknowledgments: This work was supported by Agence Nationale de Recherche to  
1055 D.P (ANR-12-JSV4-0004 Ceredystim, ANR-16-CE37-0003-02 Amedyst, ANR-19-  
1056 CE37-0007-01 Multimod) and to C.L. (ANR-17-CE37-0009 Mopla, ANR-17-CE16-  
1057 0019 Synpredict) and to B.C. (France Parkinson, Labex Memolife) and by the Institut  
1058 National de la Santé et de la Recherche Médicale (France). The authors declare no  
1059 competing financial interests. We are grateful to Sabine Meunier for the careful  
1060 reading of the manuscript. We thank the Imaging Facility at IBENS.

1061

1062 Author contributions: DP and CL acquired funding; DP and CL conceived and  
1063 designed all experiments and analysis, except all patch clamp experiments designed  
1064 by BD and LV; BC, DP, CL wrote the manuscript; BC, JLF, EP, AC, TT, CL analyzed  
1065 the data; BC, JLF, EP, AC, FM, CMH, SP, DP performed the experiments. All authors  
1066 interpreted results, revised the final manuscript, and approved the final manuscript.

1067

1068 Competing interests: The authors have no competing interests

1069

1070 Data, code and materials availability: All data are available in the main text or in the  
1071 supplementary materials. The code for electrophysiological analysis is available from  
1072 the corresponding author upon reasonable request.

1073

1074

1075 **FIGURE LEGENDS**

1076 **Fig. 1 Optogenetic stimulations of Crus II Purkinje cells both reduce and**  
1077 **prevent severe oral peak-dose dyskinesia.**

1078 **a** Experimental timeline. Dyskinetic mice (LID, magenta): 6 weeks of levodopa  
1079 treatment. Preventive mice (LID\_PREV, blue): 6 weeks of levodopa treatment + 4  
1080 weeks of cerebellar stimulations. Corrective mice (LID\_CORR, green): 6 weeks of  
1081 levodopa treatment + 2 weeks of cerebellar stimulations. **b** Sagittal schematic of a  
1082 mouse brain showing cerebello-thalamo-cortical and -striatal pathways, ChR2-YFP in  
1083 Purkinje cells (PC+ChR2, green), and injection site of 6-OHDA or saline. M1: Primary  
1084 motor cortex, ST: striatum, VAL: Ventroanterior-ventrolateral complex of the  
1085 thalamus, PF: Parafascicular nucleus of the thalamus, SNc: Substantia nigra *pars*  
1086 *compacta*, DCN: deep cerebellar nuclei, CrusII: Crus2 of the ansiform lobule. **c** *Upper*  
1087 *panel*: Coronal section from a mouse unilaterally-lesioned with 6-OHDA stained with  
1088 anti-tyrosine hydroxylase (TH). Scale bar: 0.5 mm. M1: Primary motor cortex, ST:  
1089 Striatum. *Bottom panel*: Loss of striatal TH-positive fibers (%) between the lesioned  
1090 and the intact striatum in control mice (grey, N=17) and parkinsonian animals (red,  
1091 N=40). **d** Examples of orolingual (top), axial (middle), and limb (bottom) levodopa-  
1092 induced dyskinesia in dyskinetic mice. **e** Boxplot showing the sum of oral LID scores  
1093 across the 6 weeks of levodopa treatment (light grey bar) for SHAM (grey, N=18),  
1094 LID (magenta, N=19); LID\_CORR (green, N=17); LID\_PREV (bleu, N=24). Stripped  
1095 blue lines: weeks of theta-burst PC stimulations. **f** Boxplot showing the sum of axial  
1096 LID across the 6 weeks of levodopa treatment (light grey bar) for SHAM (grey,  
1097 N=12), LID (magenta, N=8), LID\_CORR (green, N=14), LID\_PREV (bleu, N=6).  
1098 Stripped blue lines: weeks of theta-burst PC stimulations. **g** Boxplot showing the sum

1099 of limb LID scores across the 6 weeks of levodopa treatment (light grey bar) for  
1100 SHAM (grey, N=14), LID (magenta, N=9), LID\_CORR (green, N=15), LID\_PREV  
1101 (bleu, N=9). Stripped blue lines: weeks of theta-burst PC stimulations.

1102 Boxplots represents the lower and the upper quartiles as well as the median of LID  
1103 score. Kruskal-Wallis test with pairwise Wilcoxon test and Benjamini & Hochberg  
1104 correction. \*\*\* $p < 0.001$ ; \*\* $p < 0.01$ ; \* $p < 0.05$ ; \* compared to SHAM; # compared to  
1105 LID. See also Table S1.

1106

1107 **Fig. 2 Purkinje cell stimulations normalize firing rate and regularize pattern of**  
1108 **activity in the interposed nucleus.**

1109 **a** *Left*: Experimental timeline. *Right*: Schematic of electrode implantation in the  
1110 interposed nucleus (IN), ChR2-YFP expression in Purkinje cells (PC+ChR2, green)  
1111 and injection site of 6-OHDA or saline. ST: Striatum; SNc: substantia nigra *pars*  
1112 *compacta*; M1: Primary motor cortex; PF: Parafascicular nucleus of the thalamus. **b**  
1113 *Top*: Coronal section from L7-ChR2-YFP mouse. Red lines: electrode's trajectory.  
1114 Dotted white lines: IN and fastigial (FN) nuclei. Scale bar: 0.5 mm. Crus2: Crus2 of  
1115 the ansiform lobule, DN: Dentate cerebellar nucleus. *Bottom*: PC expressing YFP.  
1116 Scale bar: 20 $\mu$ m. **c** *Top*: Theta-burst protocol. *Middle*: Raster plot of a deep  
1117 cerebellar nuclei (DCN) neuron for each stimulation. Dotted line: Basal firing rate  
1118 (FR) before the onset of stimulations. Blue box: Time of optogenetic stimulation.  
1119 *Bottom*: Summary of DCN firing profiles (n=27; N=3) exhibiting a strong inhibition  
1120 (>90%) during PC stimulations. The firing rate of each unit was normalized to its  
1121 baseline. Shaded lines: mean  $\pm$  std. **d** Firing rate (Hz) across 9 weeks in the IN.  
1122 Boxplots show the median rate (horizontal bars) over 4 categories of weeks. First

1123 boxplot: 2<sup>nd</sup> and 3<sup>rd</sup> weeks; second boxplot: 4<sup>th</sup> and 5<sup>th</sup> weeks when levodopa begins;  
1124 third boxplot: 6<sup>th</sup> and 7<sup>th</sup> weeks; last boxplot: 8<sup>th</sup> and 9<sup>th</sup> weeks when stimulations  
1125 stopped. Grey = SHAM (N=5); Magenta = LID (N=3); Green = LID\_CORR (N=4);  
1126 Blue = LID\_PREV (N=3). Light grey lines: 6 weeks of levodopa treatment (3  
1127 boxplots). Stripped blue lines: weeks of theta-burst stimulations. **e** Coefficient of  
1128 variation 2 (cv2.isi) across 9 weeks in the IN. Same order of boxplot as panel **d**. Grey  
1129 = SHAM (N=5); Magenta = LID (N=3); Green = LID\_CORR (N=4); Blue = LID\_PREV  
1130 (N=3). Light grey lines: 6 weeks of levodopa treatment (3 boxplots). Stripped blue  
1131 lines: weeks of theta-burst stimulations.

1132 Boxplots represents the lower and the upper quartiles. Welch Anova with Games  
1133 Howell post-hoc test and one-way Anova's with Tukey post-hoc test based on  
1134 Levene test. \*\*\*p < 0.001; \*\*p < 0.01; \*p < 0.05; ns: p > 0.5. See also Tables S2, S3,  
1135 and S4.

1136

1137 **Fig. 3 Aberrant activity in the motor cortex and the parafascicular nucleus of**  
1138 **the thalamus in dyskinesia is restored by Purkinje cell stimulations.**

1139 **a** *Top*: Experimental timeline. *Bottom*: Schematic of electrode implantation in the  
1140 primary motor cortex (M1) and the parafascicular nucleus of the thalamus (PF),  
1141 ChR2-YFP expression in the Purkinje cells (PC+ChR2, green), and injection site of 6-  
1142 OHDA or saline. ST: Striatum; SNc: substantia nigra *pars compacta*; DCN: deep  
1143 cerebellar nuclei; VAL: Ventroanterior-ventrolateral complex of the thalamus. **b** *Top*:  
1144 Coronal section from L7-ChR2-YFP mouse showing the electrode's trajectory (dotted  
1145 yellow line) and the lesion site (red circle) in layer 5 of the oral M1 (oM1). Scale bar:  
1146 0.5 mm. *Bottom*: Coronal section from L7-ChR2-YFP mouse showing the electrode's

1147 trajectory (dotted yellow line) and the lesion site (red circle) in the parafascicular  
1148 nucleus of the thalamus (PF). Scale bar: 0.5 mm. **c** Firing rate (Hz) across 9 weeks in  
1149 M1. Boxplots show the median rate (horizontal bars), over 4 categories of weeks.  
1150 First boxplot: 2<sup>nd</sup> and 3<sup>rd</sup> week of the protocol, second boxplot: 4<sup>th</sup> and 5<sup>th</sup> weeks  
1151 when levodopa begins, third boxplot: 6<sup>th</sup> and 7<sup>th</sup> weeks, last boxplot: 8<sup>th</sup> of the  
1152 protocol when stimulations stopped. Grey = SHAM (N=5); Magenta = LID (N=4);  
1153 Green = LID\_CORR (N=6); Blue = LID\_PREV (N=8). Light grey lines: 6 weeks of  
1154 levodopa treatment (3 boxplots). Stripped blue lines: weeks of theta-burst PC  
1155 stimulations. **d** Firing rate (Hz) across 9 weeks in the parafascicular nucleus of the  
1156 thalamus (PF). Same order of boxplot as panel **c**. Grey = SHAM (N=5); Magenta =  
1157 LID (N=4); Green = LID\_CORR (N=6); Blue = LID\_PREV (N=8). Light grey lines: 6  
1158 weeks of levodopa treatment (3 boxplots). Stripped blue lines: weeks of theta-burst  
1159 PC stimulations.

1160 Boxplots represents the lower and the upper quartiles. One-way Anova with Tukey  
1161 HSD post-hoc test. \*\*\*p < 0.001; \*\*p < 0.01; \*p < 0.05; ns: p > 0.5. See also Tables  
1162 S5 and S6.

1163

1164 **Fig. 4 DCN monosynaptic inputs to PF and collaterals.**

1165 **a** Retrograde labeling strategy by viral injection of retrograde AAV-syn-GFP in the  
1166 parafascicular nucleus of the thalamus (PF). **b** Anterior to posterior cerebellar  
1167 sections showing retrograde labeled neurons in the three deep cerebellar nuclei  
1168 (DCN): dentate (DN), interposed (IN), and fastigial (FN). Scale bar: 1 mm. **c** High-  
1169 magnification on DCN from **b**. Scale bar: 0.5 mm. **d** Quantification of the cell fraction  
1170 (%) of retrograde labeled DN, IN and FN neurons projecting to PF. **e** Distribution of

1171 retrograde labeled DCN neurons projecting to PF in each nucleus. **f** Tracing of axon  
1172 collaterals from DCN-PF projecting neurons by expression of retrograde AAV-Cre in  
1173 PF, AAV-DIO-SynP-GFP and AAV-DIO-tdTomato in IN, FN, and DN. **g** Posterior  
1174 thalamic section showing DCN neurons projecting to PF expressing Cre-dependent  
1175 Synaptophysin (SynP)-GFP and tdTomato. Scale bar: 1mm. **h** Zoom-in of PF section  
1176 exhibiting synaptic boutons (arrows) in DCN inputs Scale bar: 100  $\mu$ m. **i-j** Anterior  
1177 thalamic section showing axon collaterals within the thalamus. Scale bar: 1mm. **j**  
1178 Zoom-in from **i** of VAL section exhibiting some synaptic boutons (arrows) from DCN-  
1179 PF axon collaterals. Scale bar: 1mm.

1180

1181 **Fig. 5 DCN to PF pathway inhibition counteracts the effects of Purkinje cells**  
1182 **stimulation on the severity of oral dyskinesia in preventive mice**

1183 **a** Experimental timeline. **b** Schematic of mouse coronal sections showing the  
1184 injection site of the retrograde CAV2-Cre-GFP in the parafascicular nucleus of the  
1185 thalamus (PF, green) ipsilateral-to-the-lesion (top, left) and the injection site of the  
1186 anterograde Cre-dependent AAV-hSyn-DIO-hM4Di-mCherry in the three deep  
1187 cerebellar nuclei (DCN, red) contralateral-to-the-lesion. **c** Coronal section from L7-  
1188 ChR2-YFP mouse showing the injection site of retrograde CAV2-Cre-GFP in PF. Red  
1189 dotted lines: needle's trajectory. White dotted lines highlight the limits of PF within the  
1190 thalamus. Scale bar: 100  $\mu$ m. **d** Coronal section from L7-ChR2-YFP mouse showing  
1191 the expression of anterograde pAAV-hSyn-DIO-hM4Di-mCherry in neurons (red) of  
1192 DCN. Med: medial cerebellar nucleus; IntP: interposed cerebellar nucleus, posterior  
1193 part; IntA: interposed cerebellar nucleus, anterior part; IntDL: interposed cerebellar  
1194 nucleus, dorsolateral hump; Lat: lateral cerebellar nucleus. Blue = DAPI; green =



1195 GFP; Red = mCherry. Scale bar: 100  $\mu$ m. Insert: Postmortem histology showing  
1196 hM4Di-mCherry-expressing neurons in the fastigial nucleus (i, FN), the interposed  
1197 nucleus (ii, IN), and the dentate nucleus (iii, DN). Scale bars: 20 $\mu$ m. **e** Boxplots  
1198 showing the average score of oral LID severity at the point time corresponding to 40  
1199 minutes after levodopa injection, 50 minutes after CNO injection and right after  
1200 chronic theta-burst stimulations of Purkinje cells. Average score comprises the 4  
1201 weeks of preventive cerebellar stimulations in two groups: light blue represents  
1202 preventive animals receiving 4 weeks of cerebellar stimulations + daily injections of  
1203 both levodopa and saline (LID\_PREV saline, N=5), dark blue represents preventive  
1204 animals receiving 4 weeks of cerebellar stimulations + daily injections of both  
1205 levodopa and CNO (LID\_PREV CNO, N=6). Horizontal bars in boxplots represent the  
1206 median score. Boxplots represents the lower and the upper quartiles. Non-parametric  
1207 Kruskal-Wallis test with pairwise Wilcoxon test and a Benjamini & Hochberg  
1208 correction were used. \*\*\* $p < 0.001$ ; \*\* $p < 0.01$ ; \* $p < 0.05$ ; ns:  $p > 0.05$ .

1209

1210 **Fig. 6 Spike-timing dependent plasticity produce LTD instead of LTP in D1-**  
1211 **expressing neurons following Purkinje cell stimulations**

1212 **a** *Left*. Experimental timeline. Control mice (SHAM): 6 weeks of levodopa treatment.  
1213 Preventive control mice (SHAM\_PREV): 6 weeks of levodopa treatment + 4 weeks of  
1214 cerebellar stimulations. Dyskinetic mice (LID): 6 weeks of levodopa treatment.  
1215 Preventive mice (LID\_PREV): 6 weeks of levodopa treatment + 4 weeks of cerebellar  
1216 stimulations. *Ex vivo* experiments were realized on mice subjected to 4 conditions,  
1217 i.e. SHAM, SHAM\_PREV, LID and LID\_PREV. *Right*. STDP pairings: A single spike  
1218 evoked in the recorded MSN (post) was paired with a single cortical stimulation (pre);

1219 pairings were repeated 100 times at 1 Hz. **b-e** Averaged time courses of  
1220 corticostriatal STDP in D1-MSNs and D2-MSNs induced by 100 post-pre pairings. **b**  
1221 In SHAM, LTP induced by 100 post-pre pairings in D1-MSNs and D2-MSNs (n=21).  
1222 **c** In SHAM\_PREV, LTP induced by 100 post-pre pairings in D1-MSNs and D2-MSNs  
1223 (n=20). **d** In LID, LTP induced by 100 post-pre pairings in D1-MSNs (n=12) and D2-  
1224 MSNs (n=9). **e** In LID\_PREV, LTP induced by 100 post-pre pairings in D1-MSNs  
1225 (n=10) and the same protocol induced LTD in D2-MSNs (n=9). Synaptic strength was  
1226 determined 34-44 min after pairings. Error bars represent the SEM. \*\*p < 0.01; \*\*\*p <  
1227 0.001; \*\*\*\*p < 0.0001 by one sample t test.

1228

1229 **Fig. 7 Striatal overexpression of the dyskinetic marker FosB/ $\Delta$ FosB is restored**  
1230 **by Purkinje cell stimulations.**

1231 **a** Sagittal schematic showing neurons in the striatum expressing the dyskinetic  
1232 marker FosB/ $\Delta$ FosB (green). The cerebello-thalamo-cortical and cerebello-thalamo-  
1233 striatal pathways are represented in mice expressing ChR2-YFP in Purkinje cells  
1234 (PC+ChR2, green) as well as the injection site 6-OHDA or saline (grey). ST:  
1235 Striatum; SNc: substantia nigra *pars compacta*; M1: Primary motor cortex, VAL:  
1236 Ventroanterior-ventrolateral complex of the thalamus, PF: Parafascicular nucleus of  
1237 the thalamus, DCN: deep cerebellar nuclei, CrusII: Crus2 of the ansiform lobule.  
1238 Insets: Postmortem histology showing FosB-expressing neurons (i), DAPI (ii), and  
1239 merged (iii). Scale bars: 20 $\mu$ m. **b** Boxplots showing the ratio of cells expressing FosB  
1240 between the striatum ipsilateral to the lesion and the striatum contralateral to the  
1241 lesion in percentage (%) in the 4 different conditions (magenta = LID, N=10; grey =  
1242 SHAM, N=10; green = LID\_CORR, N=7; and blue = LID\_PREV, N=10). Horizontal  
1243 bars in boxplots represent the median. Magenta inset: Postmortem histology showing

1244 FosB-expressing neurons in dyskinetic animals in the striatum ipsilateral to the lesion  
1245 (left box) and in the striatum contralateral to the lesion (right box). Scale bars: 20 $\mu$ m.  
1246 Blue inset: Postmortem histology showing FosB-expressing neurons in preventive  
1247 animals in the striatum ipsilateral to the lesion (left box) and in the striatum  
1248 contralateral to the lesion (right box). Scale bars: 20 $\mu$ m.

1249 Boxplots represents the lower and the upper quartiles. Student t-test. \*\*\* $p < 0.001$ ;  
1250 \*\* $p < 0.01$ ; \* $p < 0.05$ . \* Compared to SHAM; # compared to LID. See also Table S7.

1251

1252 **SUPPLEMENTARY FIGURE LEGENDS**

1253 **Supplementary Fig. S1 Optogenetic stimulations of CrusII Purkinje cells are**  
1254 **sufficient to both reduce and prevent severe orolingual peak-dose dyskinesia.**

1255 **Related to Fig. 1**

1256 **a** Examples of orolingual peak-dose levodopa-induced dyskinesia in L7-ChR2-YFP  
1257 LID parkinsonian mice chronically treated with levodopa. **b** Boxplot showing the  
1258 average oral LID scores measured over 7 time points starting from the time of  
1259 levodopa injection (black arrows) across the 6 weeks of treatment in SHAM (grey,  
1260 N=17), LID (magenta, N=19), LID\_CORR receiving 2 weeks of Purkinje cell  
1261 stimulations (green, N=24), and LID\_PREV mice receiving 4 weeks of Purkinje cell  
1262 stimulations (blue, N=18). Boxplots represents the lower and the upper quartiles and  
1263 horizontal bars in boxplots represent median score. Light grey lines: time of levodopa  
1264 peak-dose effect. Striped blue lines: time of theta-burst stimulations. **c** Boxplot  
1265 showing the average oral “off-period” LID scores measured 20 minutes before  
1266 levodopa injection across the 6 weeks of treatment in SHAM (grey, N=8), LID  
1267 (magenta, N=6), LID\_CORR (green, N=6), and LID\_PREV mice (blue, N=4).  
1268 Boxplots represents the lower and the upper quartiles and horizontal bars in boxplots  
1269 represent median score. Light grey lines: 6 weeks of levodopa treatment. Stripped  
1270 blue lines: weeks of Purkinje cell stimulations. See also Table S1.

1271

1272 **Supplementary Fig. S2 Optogenetic stimulations of CrusII Purkinje cells are not**  
1273 **sufficient to completely reduce and prevent severe axial peak-dose dyskinesia.**

1274 **Related to Fig. 1**

1275 **a** Examples of axial peak-dose levodopa-induced dyskinesia in L7-ChR2-YFP LID  
1276 parkinsonian mice chronically treated with levodopa. **b** Boxplot showing the average  
1277 axial LID scores measured over 7 time points starting from the time of levodopa  
1278 injection (black arrows) across the 6 weeks of treatment in SHAM (grey, N=12), LID  
1279 (magenta, N=8), LID\_CORR receiving 2 weeks of Purkinje cell stimulations (green,  
1280 N=14), and LID\_PREV mice receiving 4 weeks of Purkinje cell stimulations (blue,  
1281 N=6). Boxplots represents the lower and the upper quartiles and horizontal bars in  
1282 boxplots represent median score. Light grey lines: time of levodopa peak-dose effect.  
1283 Striped blue lines: time of theta-burst stimulations.

1284

1285 **Supplementary Fig. S3 Optogenetic stimulations of CrusII Purkinje cells are not**  
1286 **sufficient to completely reduce and prevent severe limb peak-dose dyskinesia.**

1287 **Related to Fig. 1**

1288 **a** Examples of limb peak-dose levodopa-induced dyskinesia in L7-ChR2-YFP LID  
1289 parkinsonian mice chronically treated with levodopa. **b** Boxplot showing the average  
1290 limb LID scores measured over 7 time points starting from the time of levodopa  
1291 injection (black arrows) across the 6 weeks of treatment in SHAM (grey, N=14), LID  
1292 (magenta, N=9), LID\_CORR receiving 2 weeks of Purkinje cell stimulations (green,  
1293 N=15), and LID\_PREV mice receiving 4 weeks of Purkinje cell stimulations (blue,  
1294 N=9). Boxplots represents the lower and the upper quartiles and horizontal bars in  
1295 boxplots represent median score. Light grey lines: time of levodopa peak-dose effect.  
1296 Striped blue lines: time of theta-burst stimulations.

1297

1298 **Supplementary Fig. S4 Optogenetic stimulations of CrusII Purkinje cells does**  
1299 **not affect severe peak-dose oral, axial and limb dyskinesia in SHAM. Related to**  
1300 **Fig. 1**

1301 Boxplot showing the sum of oral (left), axial (middle), and limb (right) LID scores  
1302 measured over 8 time points starting 20 minutes before levodopa injection to 120  
1303 minutes after across the 6 weeks of treatment in SHAM mice treated with levodopa  
1304 (dark grey, SHAM, N=4), SHAM mice treated with levodopa and receiving 2 weeks of  
1305 Purkinje cells stimulations (grey, SHAM\_CORR, N=5), SHAM mice treated with  
1306 levodopa and receiving 4 weeks of Purkinje cells stimulations (light grey,  
1307 SHAM\_PREV, N=3). Horizontal bars in boxplots represent median score. Light grey  
1308 lines: 6 weeks of levodopa treatment. Stripped blue lines: time of theta-burst  
1309 stimulations. Boxplots represents the lower and the upper quartiles. Non-parametric  
1310 Kruskal-Wallis test with pairwise Wilcox test and a Benjamini & Hochberg correction.  
1311 \*\*\*p < 0.001; \*\*p < 0.01; \*p < 0.05; ns: p > 0.5. See also Table S8.

1312

1313 **Supplementary Fig. S5. Purkinje cell stimulations do not completely normalize**  
1314 **the aberrant activity in the dentate and fastigial cerebellar nuclei. Related to**  
1315 **Fig. 2**

1316 **a** *Left:* Experimental timeline. *Right:* Schematic of electrode implantation in the  
1317 dentate (DN) and fastigial nuclei (FN), ChR2-YFP expression in the Purkinje cells  
1318 (PC+ChR2, green) and injection site with 6-OHDA or saline in sagittal mouse brain.  
1319 ST: Striatum; SNc: substantia nigra *pars compacta*; M1: Primary motor cortex; PF:  
1320 Parafascicular nucleus of the thalamus. **b** Coronal section from L7-ChR2-YFP mouse  
1321 showing electrode's trajectory (red lines). Dotted red lines: IN, FN, and DN. Green:

1322 ChR2-YFP expression. Scale bars: 0.5 mm (left); 20 $\mu$ m (right). Crus1: Crus1 of the  
1323 ansiform lobule, Crus2: Crus2 of the ansiform lobule. **c** Schematic of verified  
1324 recording sites in IN, FN, and DN (grey = SHAM; magenta = LID; green =  
1325 LID\_CORR; blue = LID\_PREV). Crus2: Crus2 of the ansiform lobule. **d** Firing rate  
1326 (Hz) across 9 weeks in DN. Boxplots show the median rate (horizontal bars), over 4  
1327 categories of weeks. First boxplot: 2<sup>nd</sup> and 3<sup>rd</sup> week of the protocol, second boxplot:  
1328 4<sup>th</sup> and 5<sup>th</sup> weeks when levodopa treatment started, third boxplot: 6<sup>th</sup> and 7<sup>th</sup> weeks,  
1329 last boxplot: 8<sup>th</sup> and 9<sup>th</sup> weeks when stimulations stopped. Grey = SHAM (N=3);  
1330 Magenta = LID (N=3); Green = LID\_CORR (N=3); Blue = LID\_PREV (N=3). Light  
1331 grey lines: 6 weeks of levodopa (3 boxplots). Stripped blue lines: weeks of theta-burst  
1332 PC stimulations. **e** Coefficient of variation 2 (cv2.isi) across 9 weeks in DN. The order  
1333 of boxplots is identical to panel **d**. Grey = SHAM (N=3); Magenta = LID (N=3); Green  
1334 = LID\_CORR (N=3); Blue = LID\_PREV (N=3). Light grey lines: 6 weeks of levodopa  
1335 (3 boxplots). Stripped blue lines: weeks of theta-burst PC stimulations. **f** Firing rate  
1336 (Hz) across 9 weeks in FN. The order of boxplots is identical to panel **d**. Grey =  
1337 SHAM (N=3); Magenta = LID (N=6); Green = LID\_CORR (N=4); Blue = LID\_PREV  
1338 (N=3). Light grey lines: 6 weeks of levodopa (3 boxplots). Stripped blue lines: weeks  
1339 of theta-burst PC stimulations. **g** Coefficient of variation 2 (cv2.isi) across 9 weeks in  
1340 FN. The order of boxplots is identical to panel **d**. Grey = SHAM (N=3); Magenta = LID  
1341 (N=6); Green = LID\_CORR (N=4); Blue = LID\_PREV (N=3). Light grey lines: 6 weeks  
1342 of levodopa (3 boxplots). Stripped blue lines: weeks of theta-burst PC stimulations.

1343 Boxplots represents the lower and the upper quartiles. Welch Anova with Games  
1344 Howell post-hoc test and one-way Anova's with Tukey post-hoc test based on  
1345 Levene test. \*\*\*p < 0.001; \*\*p < 0.01; \*p < 0.05; ns: p > 0.5. See also Tables S2, S3,  
1346 and S4.



1347

1348 **Supplementary Fig. S6 Modulation of the firing rate of the deep cerebellar**  
1349 **nuclei induced by locomotor activity. Related to Fig. 2**

1350 **a** Image of the tracking points of interest, represented by different colors (tip of the  
1351 tail: dark blue; base of the tail: light blue; right ear: dark green; left ear: light green;  
1352 nose: yellow; right led: dark red; left led: light red) during a recording session in the  
1353 openfield using Deeplabcut. **b** Evolution of the probability of the head point during the  
1354 recording. Diagram of the reconstruction of the head point (light red) from the  
1355 barycenter weighted by the probabilities of the points: nose; right ear; left ear; right  
1356 led; left led. **c** Path of the head's point as a function of the movement speed. The  
1357 movement speed is discretized in "off" and "on" periods which are represented by  
1358 blue and red circles, respectively when the speed is lower and higher than the  
1359 threshold of 1cm/s. **d** Evolution of the speed of the head's point. The moments when  
1360 the speed of the head's point crosses the threshold of 1cm/s (dotted line) are  
1361 reported by a red star. **e** Cumulative distribution of the speed of the head's point.  
1362 Threshold of 1cm/s: vertical dotted line. **f** Mean firing rate (Hz) of the deep cerebellar  
1363 nuclei (DCN) activity as a function of the average velocity defined per second (cm/s).  
1364 Mean firing rate: vertical dotted line, velocity threshold: horizontal dotted line. **g**  
1365 Evolution of the average firing rate (Hz) of the DCN activity over time. **h** Raster plot of  
1366 mean DCN activity around the transitions from "off" to "on" state of locomotor activity  
1367 (red stars in D). **i** Relation of the firing rate (Hz) between the locomotor "on" and "off"  
1368 periods defined per cell (n=12). Dotted line ( $y=x$ ), straight red line of linear regression  
1369 of the firing rate of the cells during the "on" periods as a function of the "off" periods.

1370

1371 **Supplementary Fig. S7 Locomotor activity does not impact the firing rate of the**  
1372 **three deep cerebellar nuclei in SHAM. Related to Fig. 2**

1373 *Top:* Firing rate (Hz) over 9 weeks in the three deep cerebellar nuclei (DCN) in all  
1374 control mice: the interposed nucleus (IN, left), the dentate nucleus (DN, middle), and  
1375 the fastigial nucleus (FN, right). *Middle:* Firing rate (Hz) during periods of locomotor  
1376 activity (“on”) over 9 weeks in DCN in all control mice: IN (left), DN (middle), and FN  
1377 (right). *Bottom:* Firing rate (Hz) during periods of locomotor inactivity (“off”) over 9  
1378 weeks in DCN in all control mice: IN (left), DN (middle), and FN (right).

1379 Boxplots represents the lower and the upper quartiles and show the median rate  
1380 (horizontal bars), over 4 categories of weeks. First boxplot: 2<sup>nd</sup> and 3<sup>rd</sup> week of the  
1381 protocol, second boxplot: 4<sup>th</sup> and 5<sup>th</sup> weeks when levodopa treatment started as well  
1382 as cerebellar stimulations for preventive sham mice, third boxplot: 6<sup>th</sup> and 7<sup>th</sup> weeks  
1383 when corrective sham mice start receiving cerebellar stimulations, last boxplot: 8<sup>th</sup>  
1384 and 9<sup>th</sup> weeks of the protocol when stimulations stop and long-term effects of  
1385 cerebellar stimulations are visible. Control mice only treated with levodopa  
1386 represented in dark grey (SHAM, IN: N=1, FN: N=1, DN: N=2); control mice treated  
1387 with levodopa and receiving 2 weeks of Purkinje cell stimulations represented in grey  
1388 (SHAM\_CORR, IN: N=2); control mice treated with levodopa and receiving 4 weeks  
1389 of Purkinje cell stimulations represented in grey (SHAM\_PREV, IN: N=2, FN: N=2,  
1390 DN: N=1). Light grey lines: 6 weeks of levodopa (3 boxplots). Stripped blue lines:  
1391 weeks of theta-burst Purkinje cell stimulations. Welch Anova with Games Howell  
1392 post-hoc test and one-way Anova’s with Tukey post-hoc test based on Levene test.  
1393 \*\*\*p < 0.001; \*\*p < 0.01; \*p < 0.05; ns: p > 0.5. See also Table S9.

1394

1395 **Supplementary Fig. S8 In dyskinetic mice, the burst rate decreases during**  
1396 **periods of activity and increases during periods of inactivity. These effects are**  
1397 **prevented by cerebellar stimulations in the interposed nucleus. Related to Fig.**  
1398 **2**

1399 **a** Burst rate (Hz) during periods of locomotor activity (“on”) over 9 weeks in the  
1400 interposed nucleus (IN, left), the dentate nucleus (DN, middle), and the fastigial  
1401 nucleus (FN, right). Boxplots show the median burst rate (horizontal bars), over 4  
1402 categories of weeks. First boxplot: 2<sup>nd</sup> and 3<sup>rd</sup> week of the protocol, second boxplot:  
1403 4<sup>th</sup> and 5<sup>th</sup> weeks when levodopa treatment started, third boxplot: 6<sup>th</sup> and 7<sup>th</sup>, last  
1404 boxplot: 8<sup>th</sup> and 9<sup>th</sup> weeks when stimulations stopped. Grey = SHAM (IN: N=4, DN:  
1405 N=3, FN: N=3); Magenta = LID (IN: N=3, DN: N=4, FN: N=6); Green = LID\_CORR  
1406 (IN: N=4, DN: N=3, FN: N=4); Blue = LID\_PREV (IN: N=3, DN: N=3, FN: N=3). Light  
1407 grey lines: 6 weeks of levodopa (3 boxplots). Stripped blue lines: weeks of theta-burst  
1408 Purkinje cell stimulations. **b** Burst rate (Hz) during periods of locomotor inactivity  
1409 (“off”) over 9 weeks in IN (left), DN (middle), and FN (right). Same order of boxplot as  
1410 panel A. Grey = SHAM (IN: N=4, DN: N=3, FN: N=3); Magenta = LID (IN: N=3, DN:  
1411 N=4, FN: N=6); Green = LID\_CORR (IN: N=4, DN: N=3, FN: N=4); Blue = LID\_PREV  
1412 (IN: N=3, DN: N=3, FN: N=3). Light grey lines: 6 weeks of levodopa (3 boxplots).  
1413 Stripped blue lines: weeks of theta-burst Purkinje cell stimulations.

1414 Boxplots represents the lower and the upper quartiles. Welch Anova with Games  
1415 Howell post-hoc test and one-way Anova’s with Tukey post-hoc test based on  
1416 Levene test. \*\*\*p < 0.001; \*\*p < 0.01; \*p < 0.05; ns: p > 0.5. See also Table S10 and  
1417 S11.

1418

1419 **Supplementary Fig. S9 Neither levodopa nor Purkinje cell stimulations affect**  
1420 **the firing rate in the ventroanterior-ventrolateral complex of the thalamus.**

1421 **Related to Fig. 3**

1422 **a** Experimental timeline. Dyskinetic mice (LID, red): 5 weeks of levodopa treatment.  
1423 Preventive mice LID\_PREV, blue): 5 weeks of levodopa treatment + 4 weeks of  
1424 cerebellar stimulations. Corrective mice (LID\_CORR, green): 5 weeks of levodopa  
1425 treatment + 2 weeks of cerebellar stimulations. **b** Schematic of electrode implantation  
1426 in ventroanterior-ventrolateral complex of the thalamus (VAL), ChR2-YFP expression  
1427 in the Purkinje cells (PC+ChR2, green) and injection site with 6-OHDA or saline in  
1428 sagittal mouse brain. ST: Striatum; SNc: substantia nigra *pars compacta*; M1:  
1429 Primary motor cortex, PF: Parafascicular nucleus of the thalamus, DCN: deep  
1430 cerebellar nuclei, CrusII: Crus2 of the ansiform lobule. **c** Coronal section from L7-  
1431 ChR2-YFP mouse showing the electrode's trajectory (yellow dotted line) and the  
1432 electrolytic lesion (red circle) at the recording site in VAL. Scale bar: 0.5 mm. **d** Firing  
1433 rate (Hz) across 9 weeks in VAL. Boxplots show the median rate (horizontal bars),  
1434 over 4 categories of weeks. First boxplot: 2<sup>nd</sup> and 3<sup>rd</sup> week of the protocol, second  
1435 boxplot: 4<sup>th</sup> and 5<sup>th</sup> weeks when levodopa treatment started, third boxplot: 6<sup>th</sup> and 7<sup>th</sup>  
1436 weeks, last boxplot represents the 8<sup>th</sup> week when stimulations stopped. Grey =  
1437 SHAM (N=5); Magenta = LID (N=4); Green = LID\_CORR (N=6); Blue = LID\_PREV  
1438 (N=8). Light grey lines: 6 weeks of levodopa (3 boxplots). Stripped blue lines: weeks  
1439 of theta-burst PC stimulations.

1440 Boxplots represents the lower and the upper quartiles. One-way Anova with Tukey  
1441 HSD post-hoc test. \*\*\*p < 0.001; \*\*p < 0.01; \*p < 0.05; ns: p > 0.5. See also Table  
1442 S6.

Figure 1

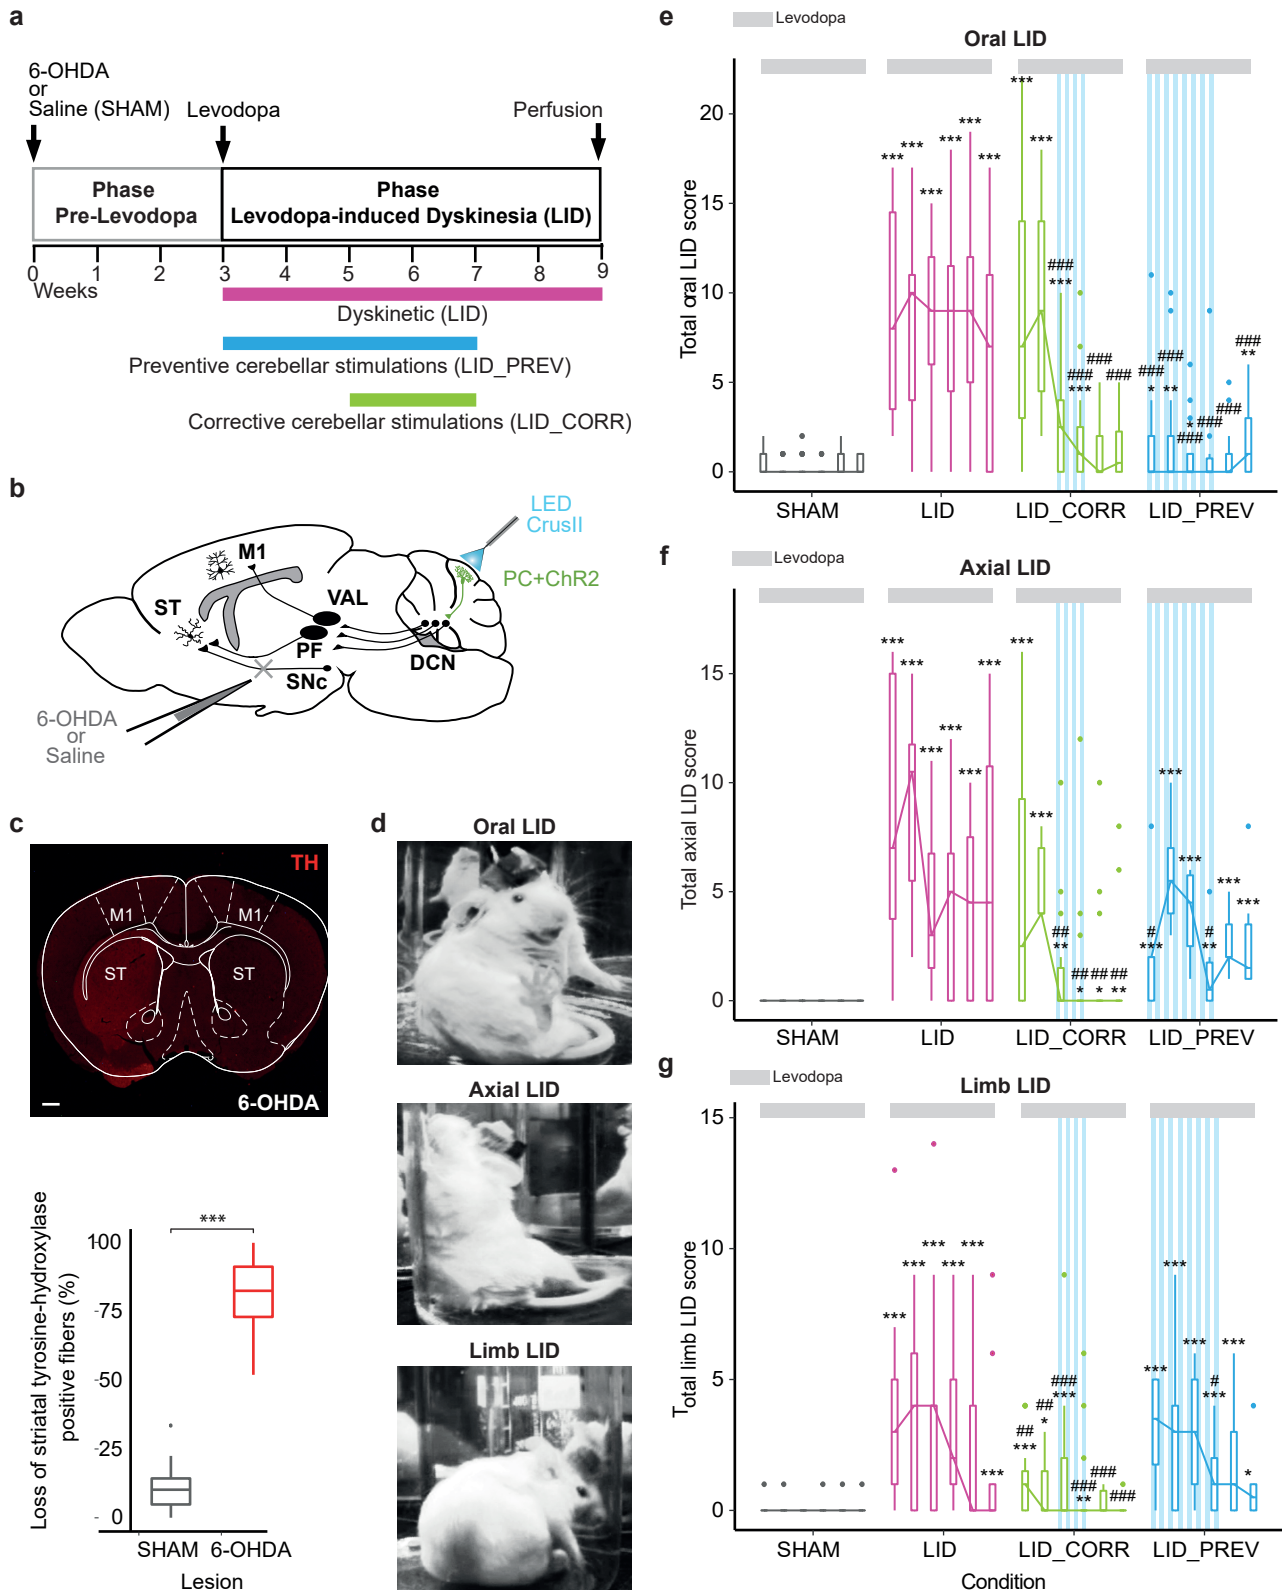

Figure 2

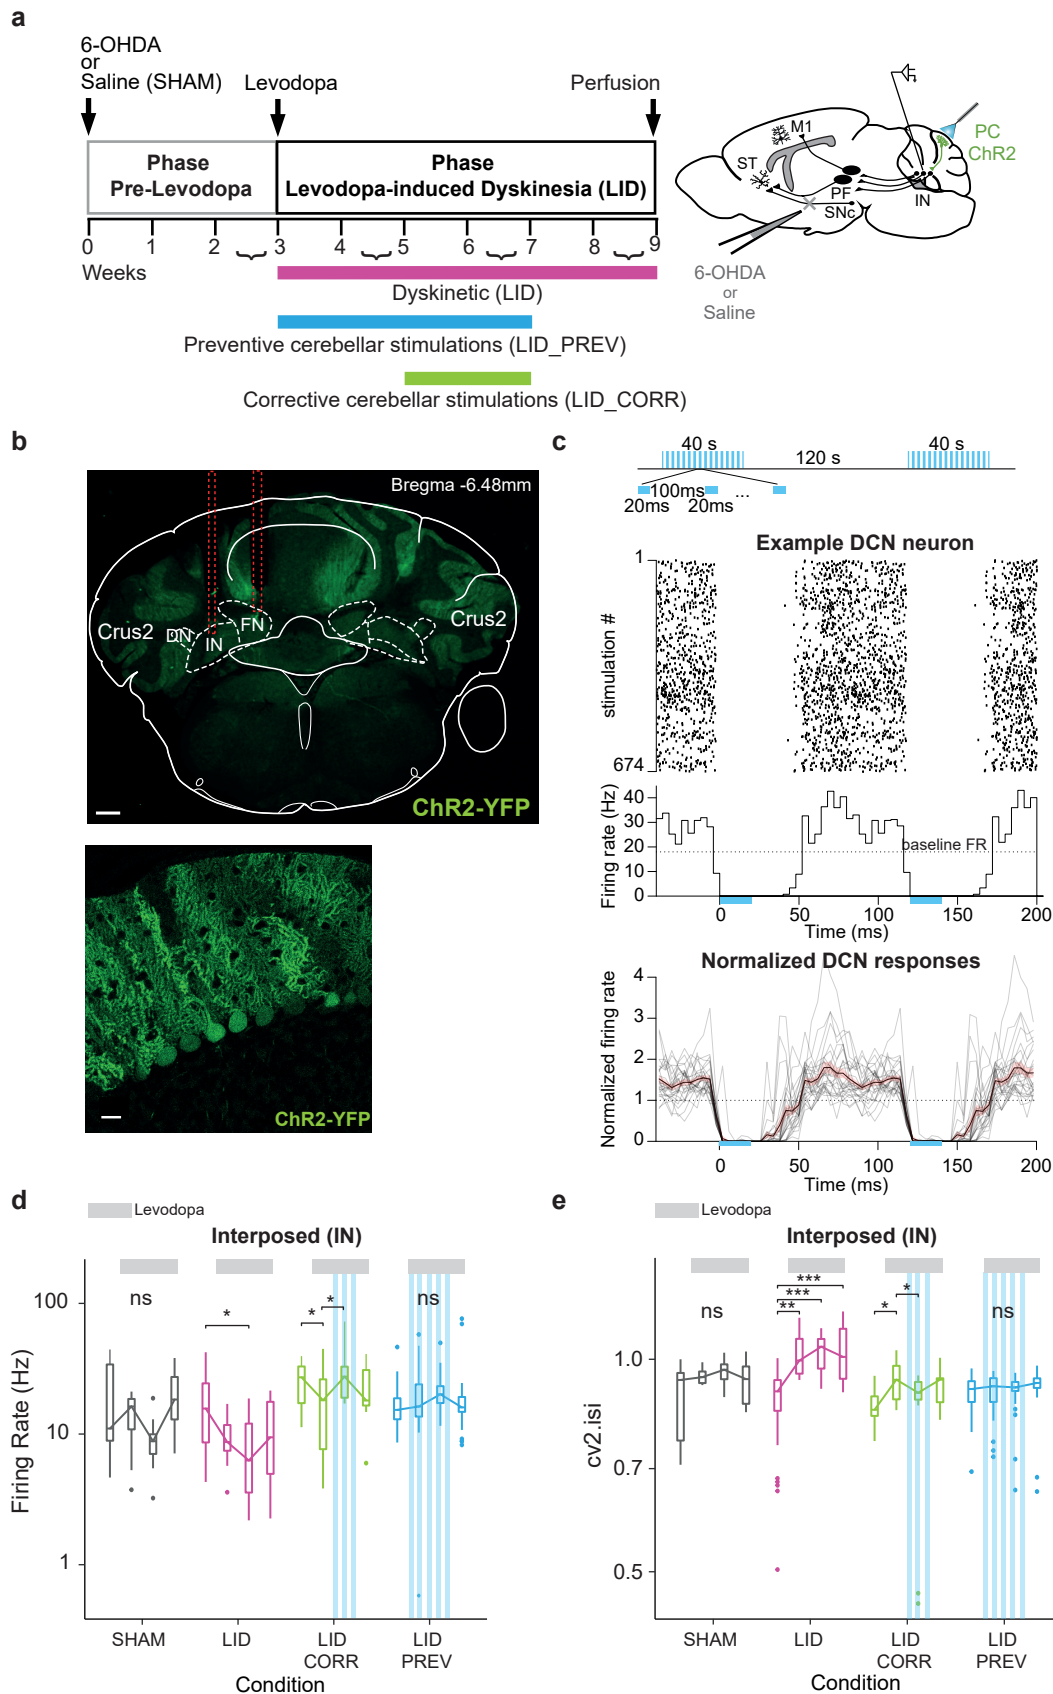

Figure 3

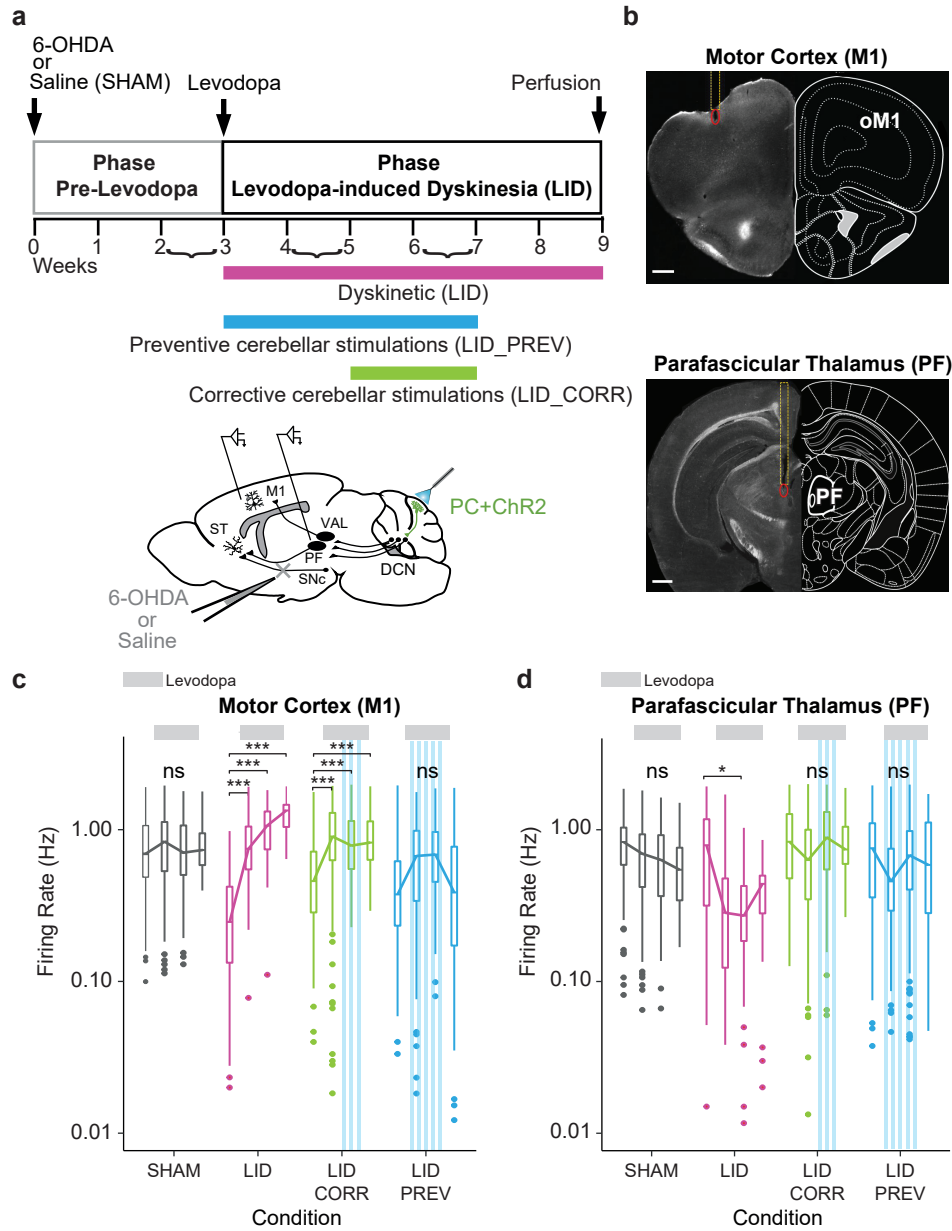



Figure 4

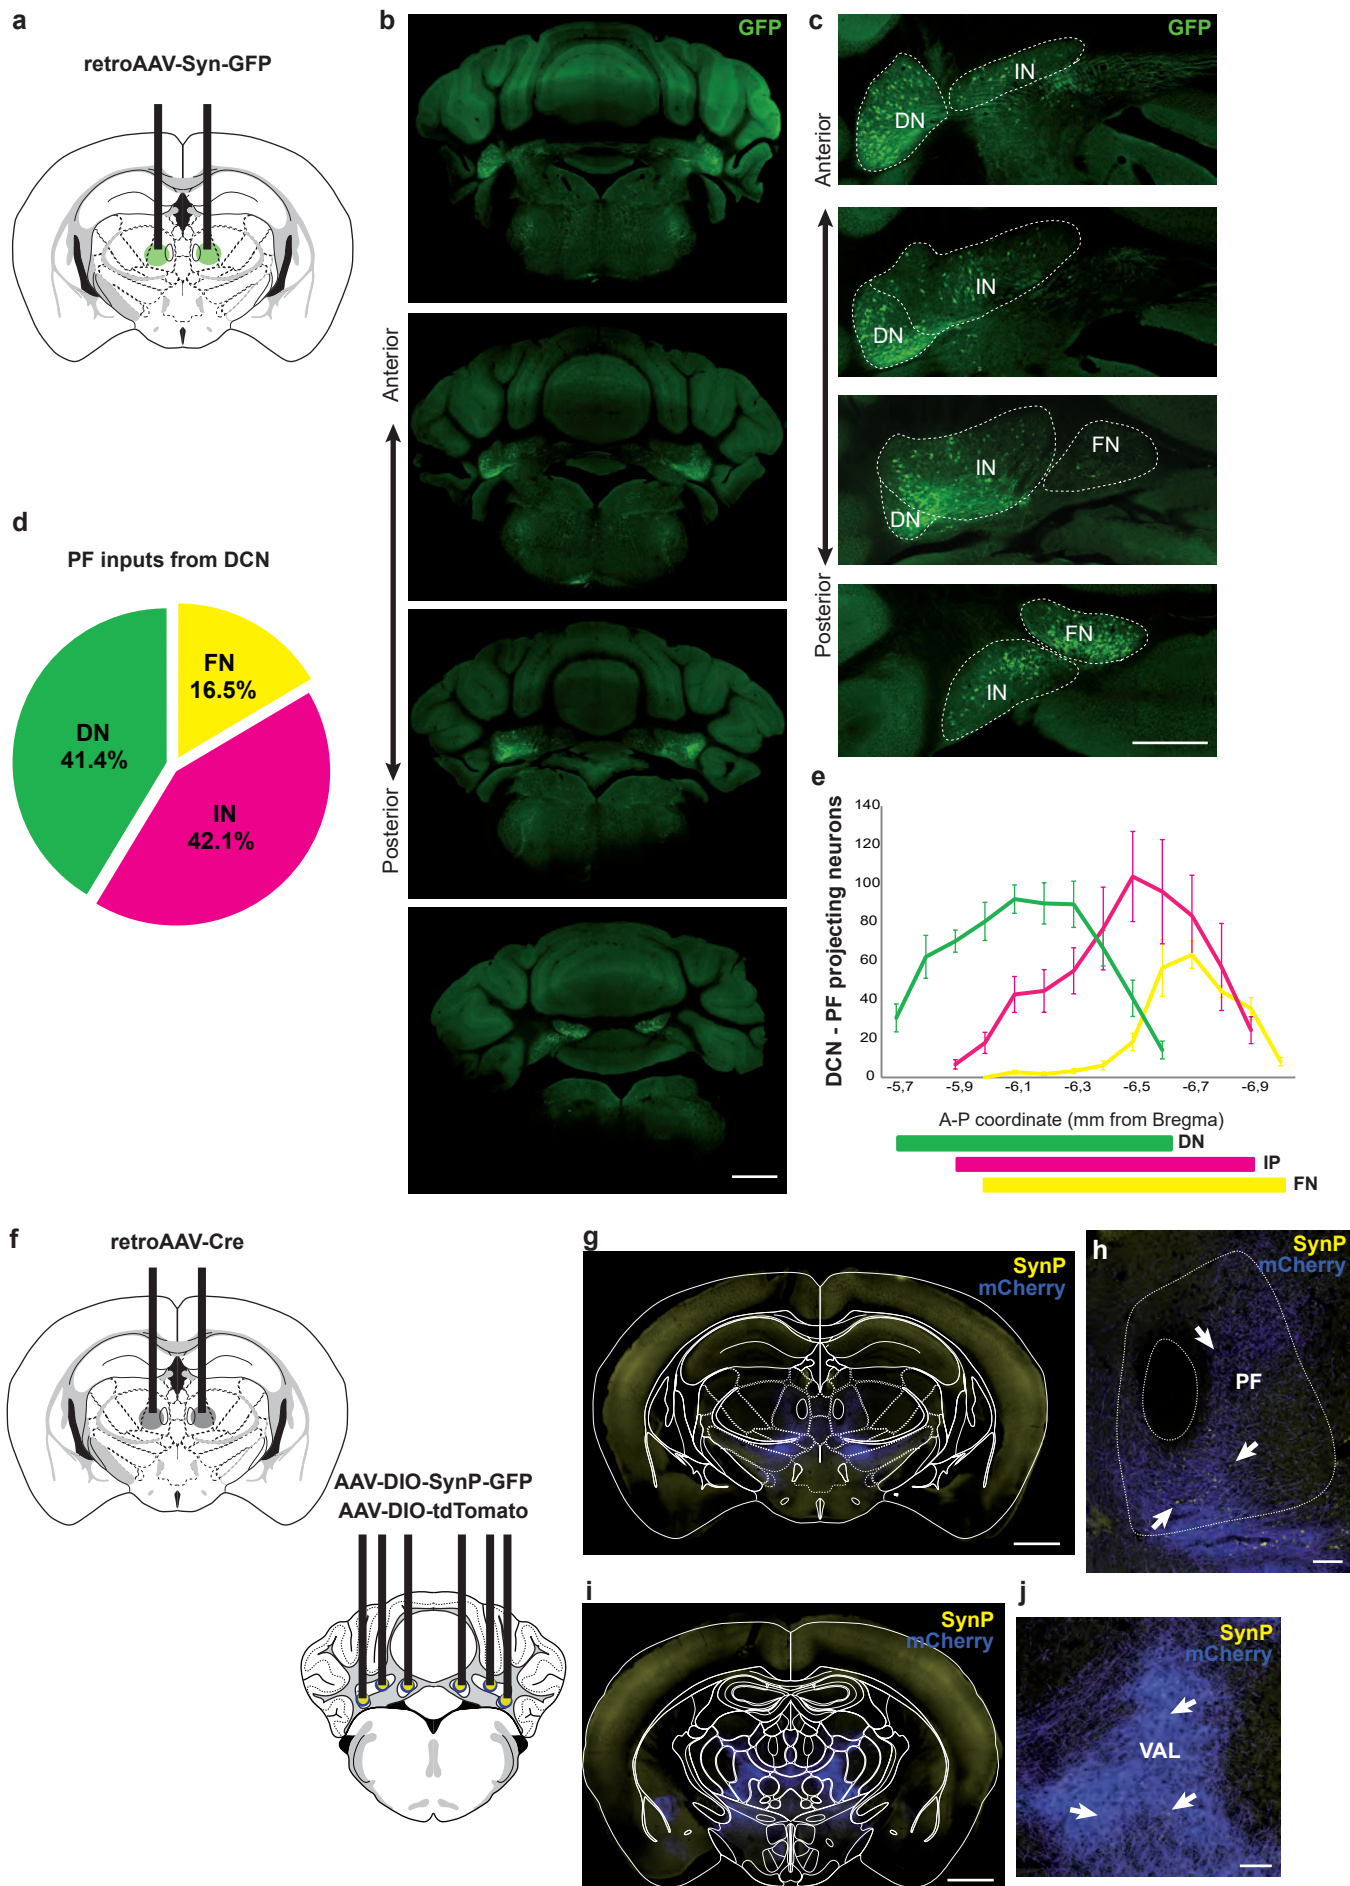

Figure 5

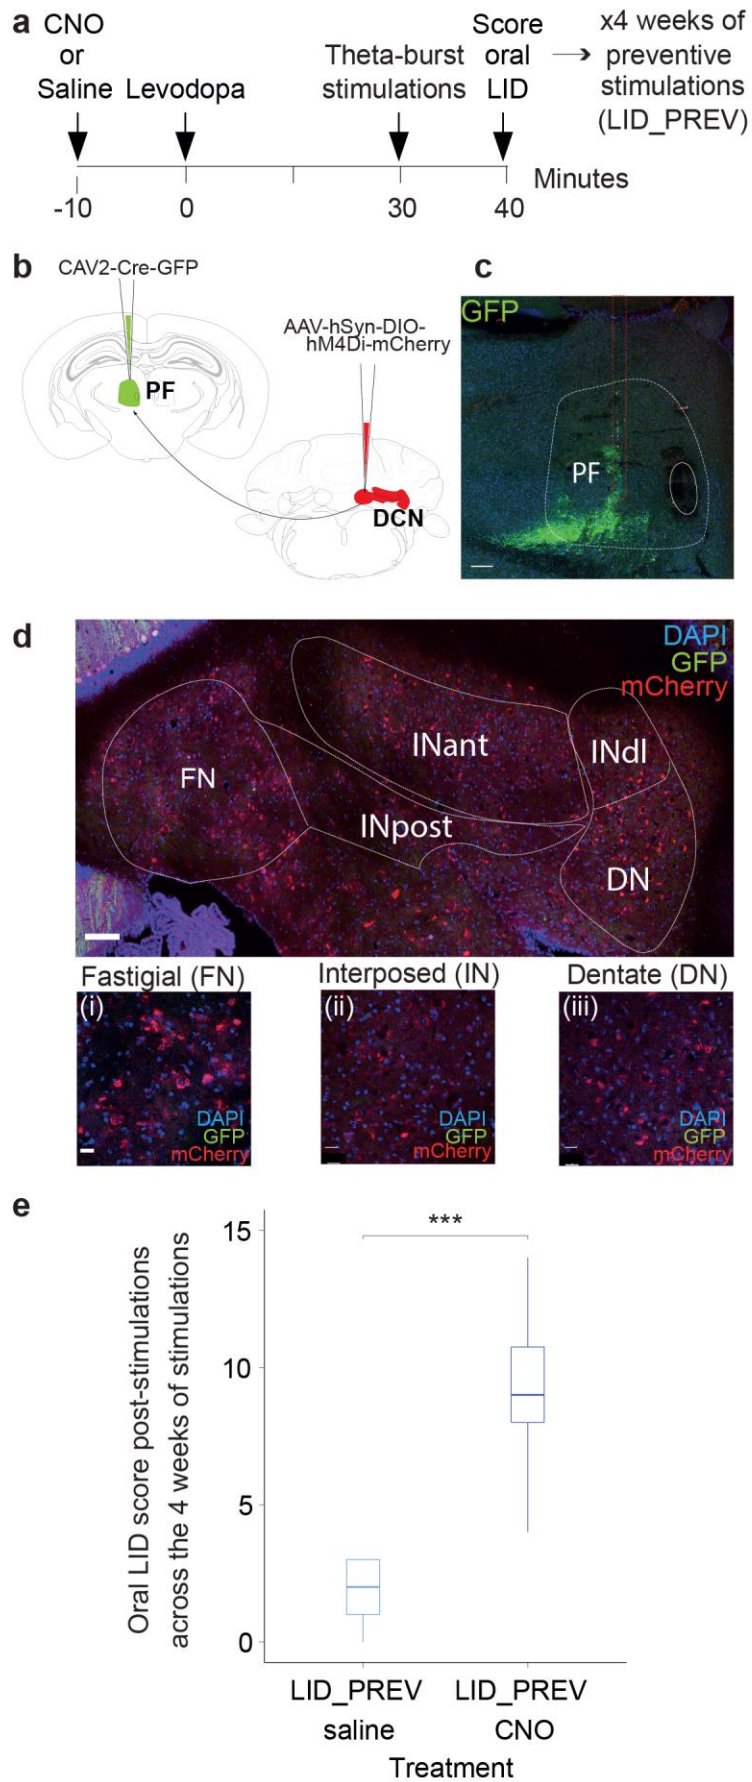

Figure 6

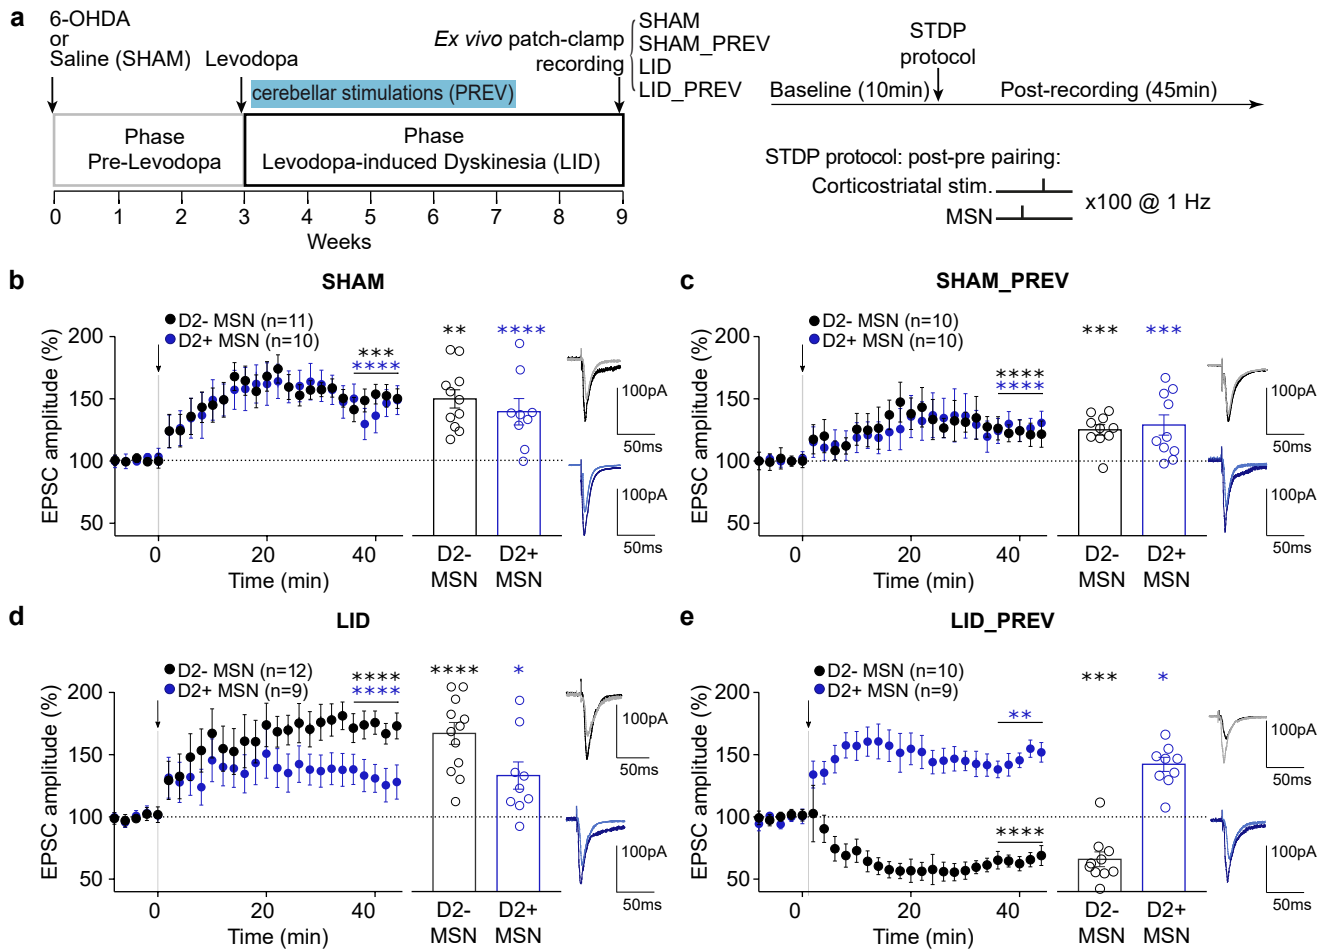

Figure 7

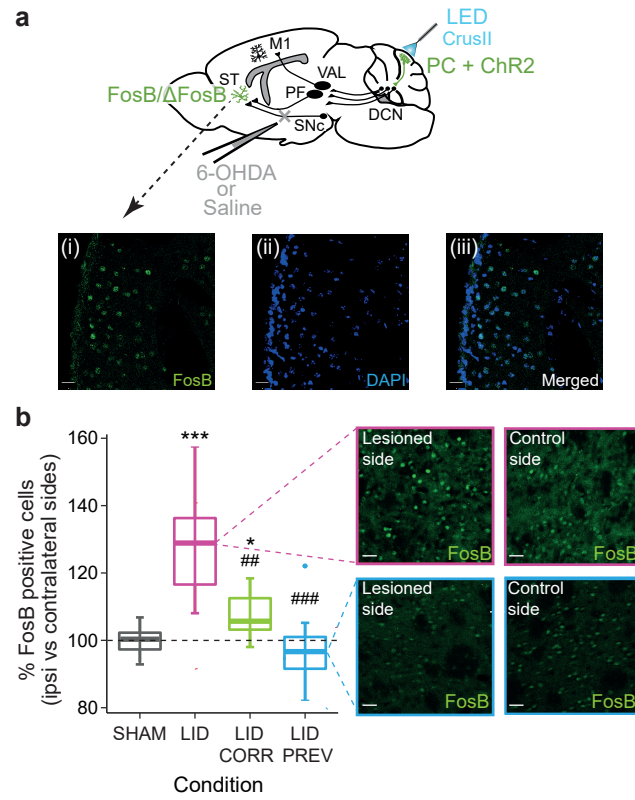

**a**

Supplementary Fig. S1

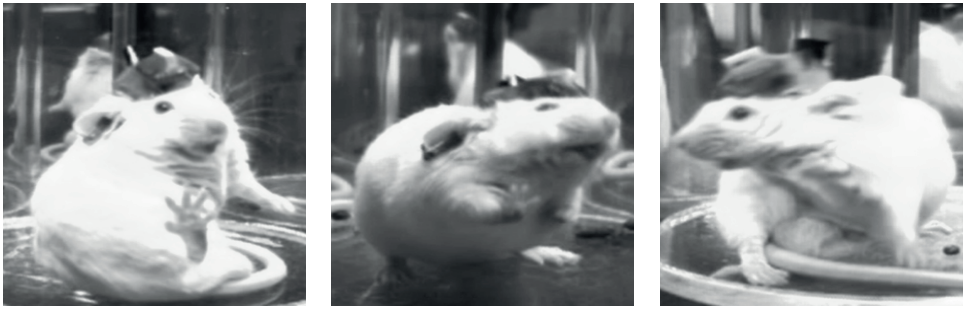

**b**

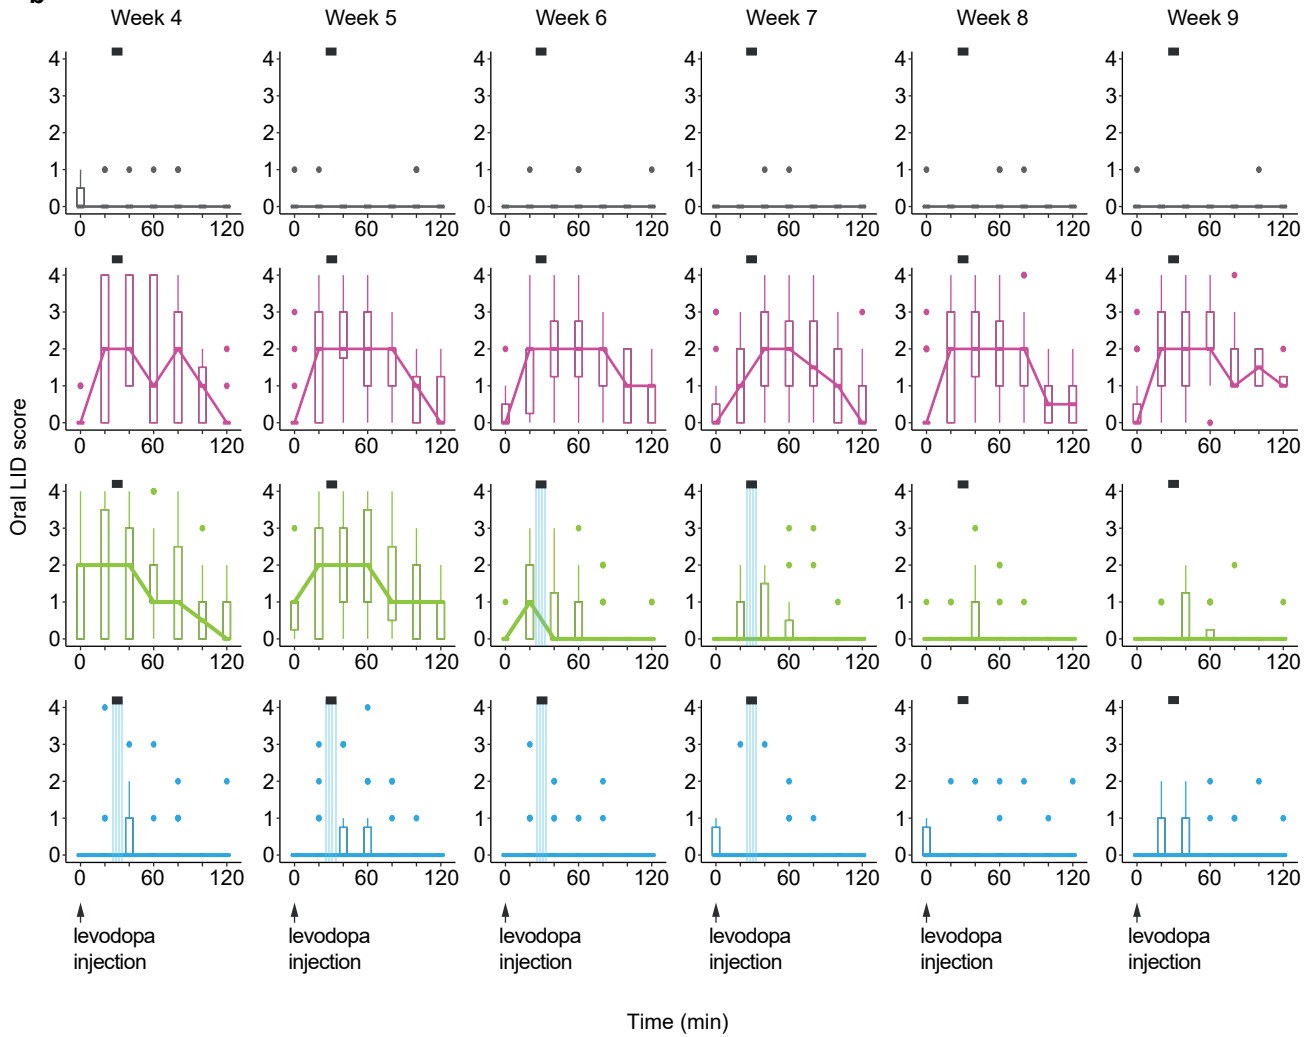

**c**

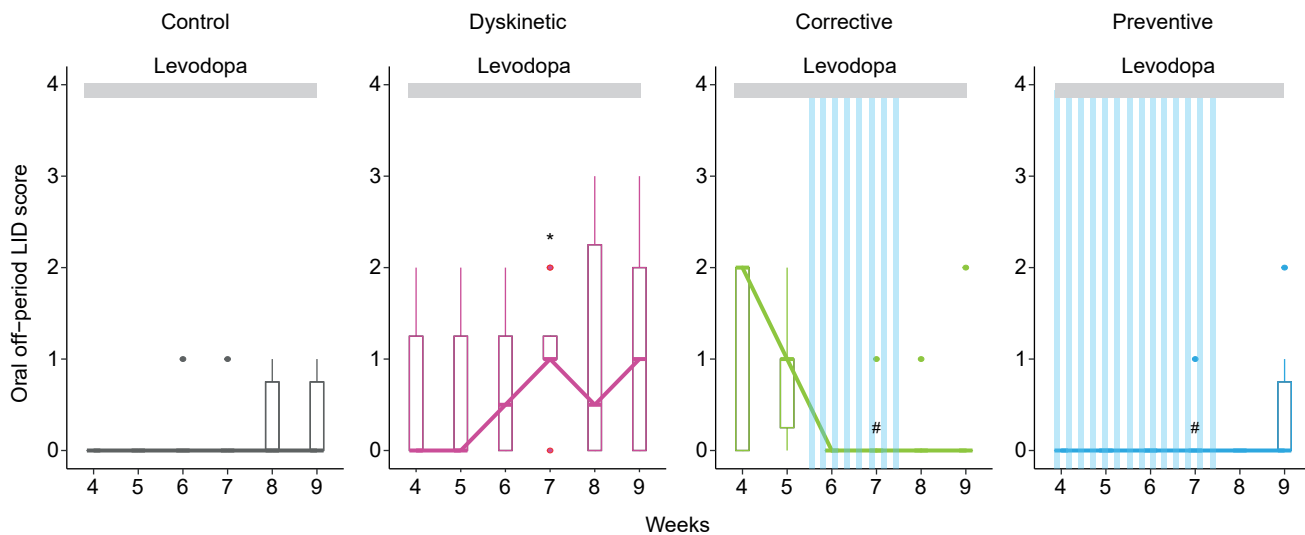



## Supplementary Fig. S2

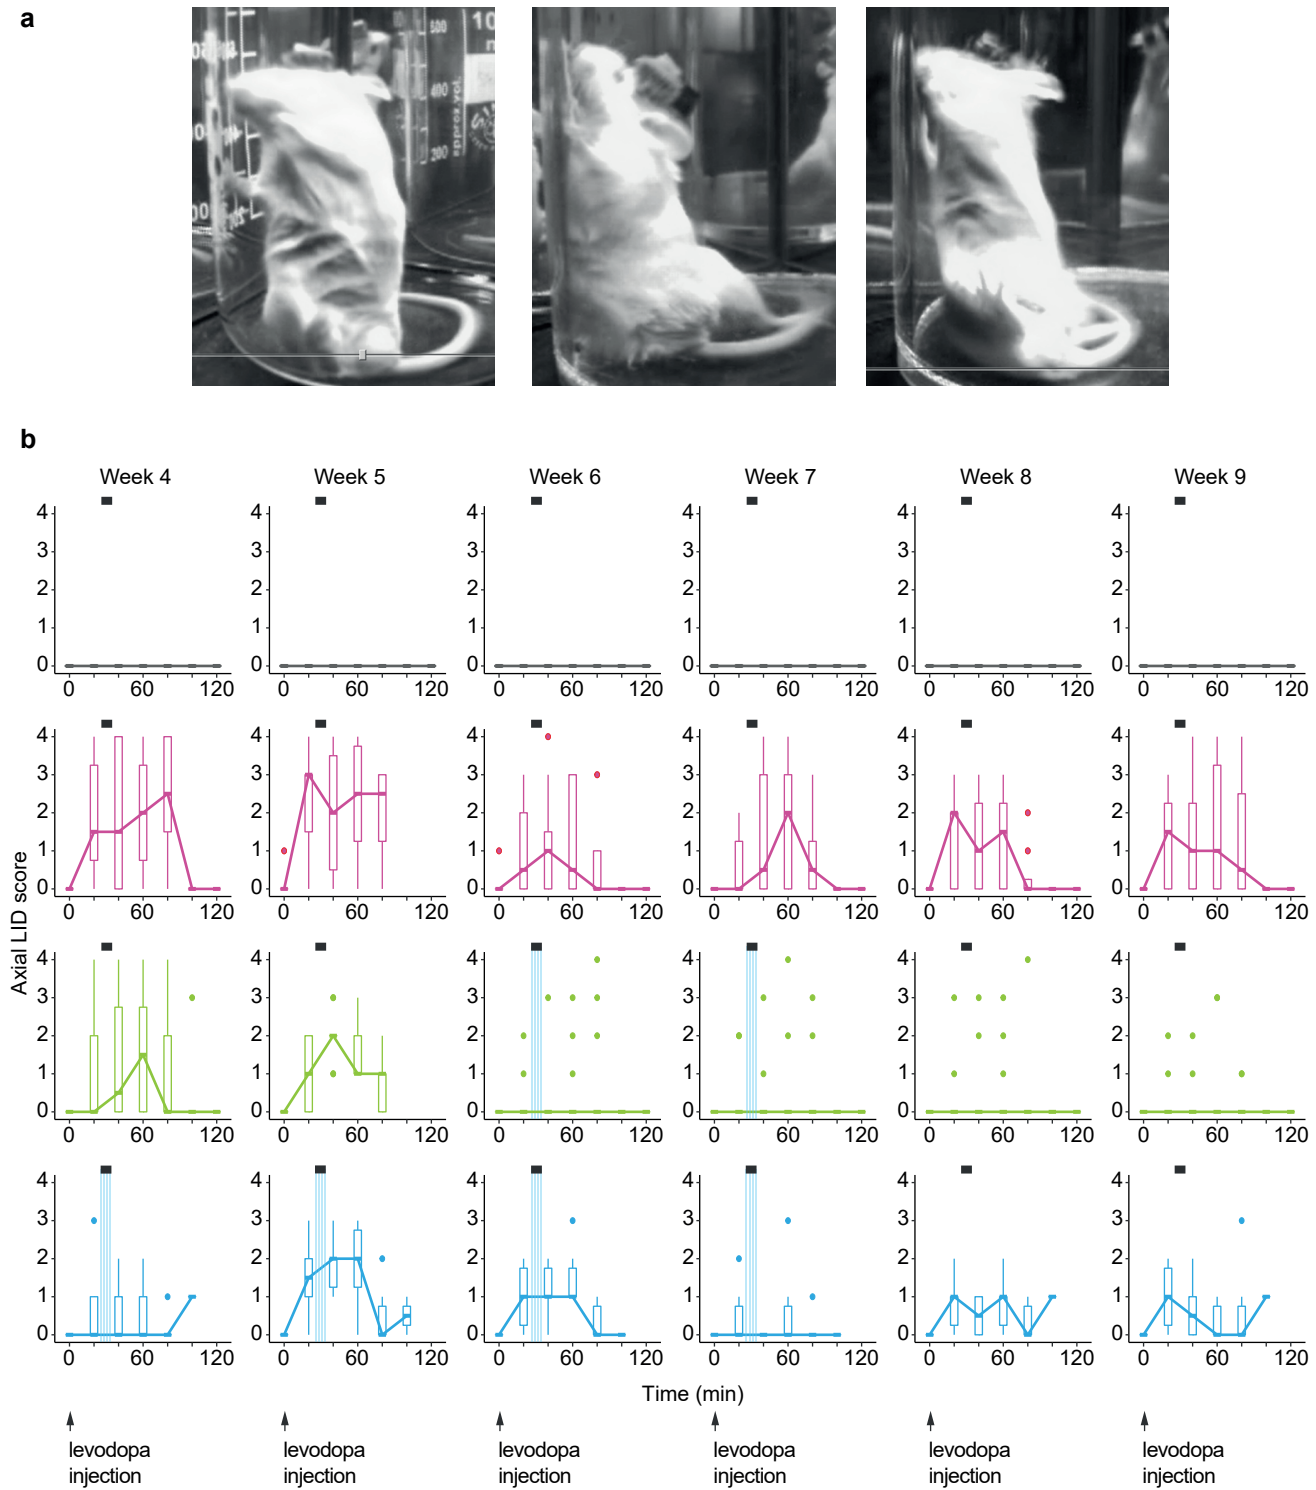

## Supplementary Fig. S3

**a**

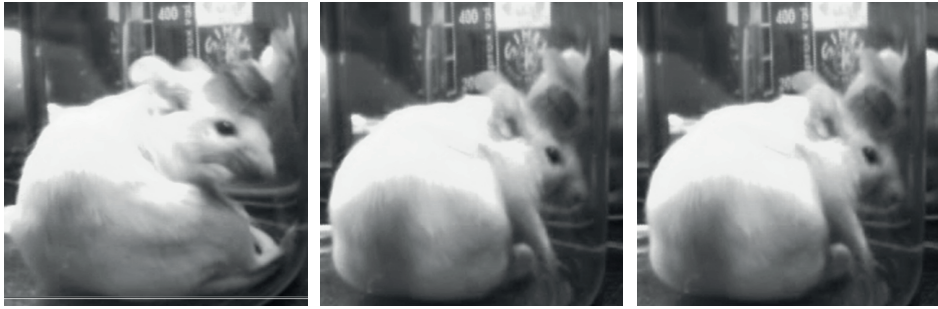

**b**

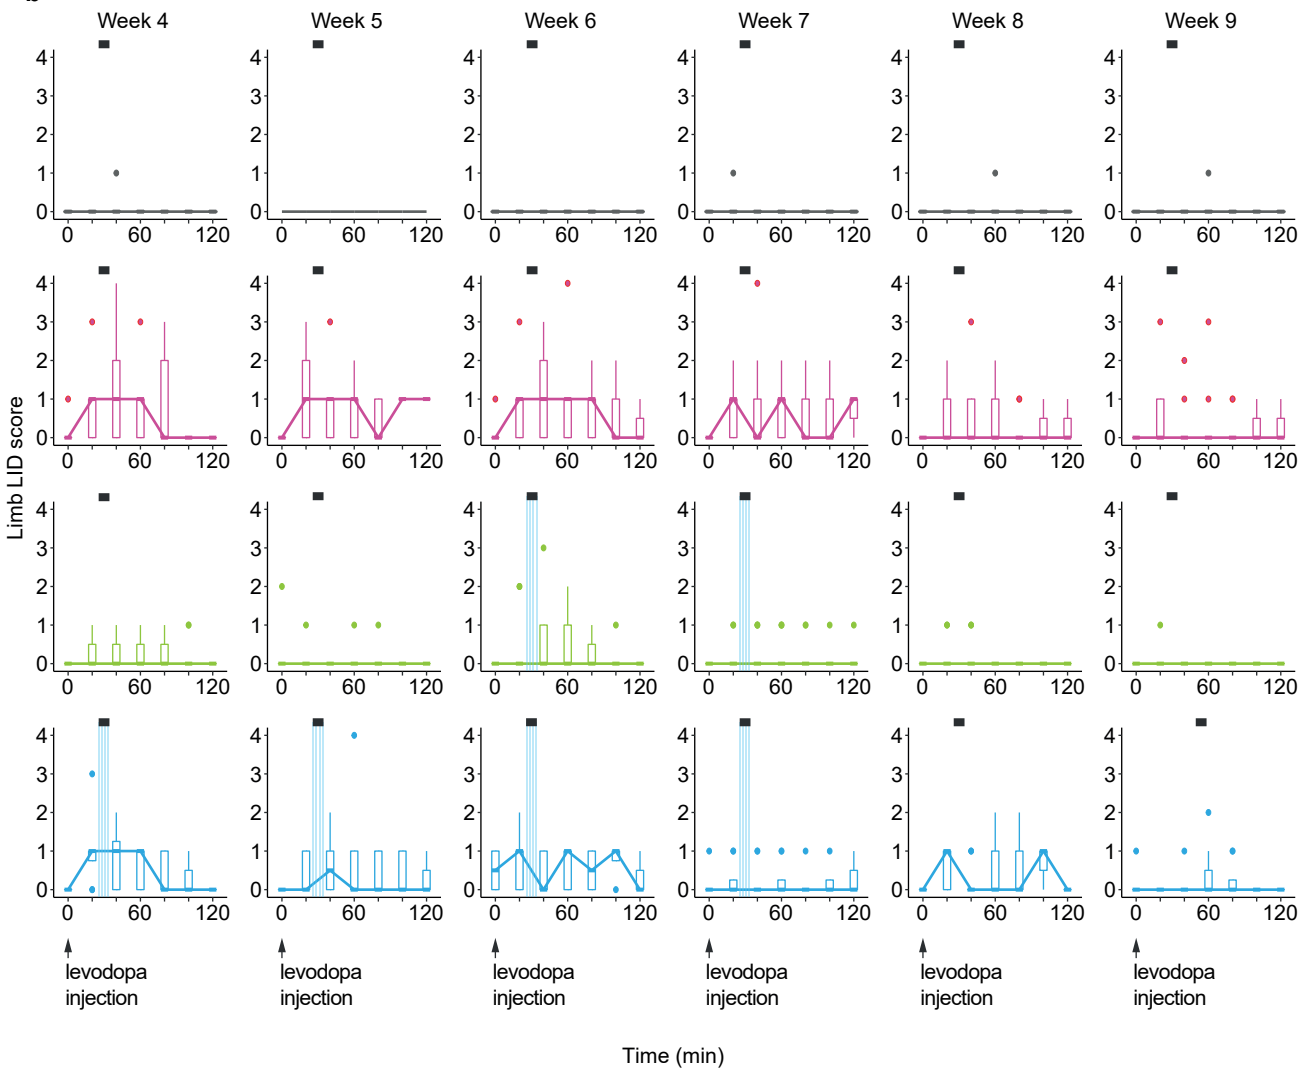



### Supplementary Fig. S4

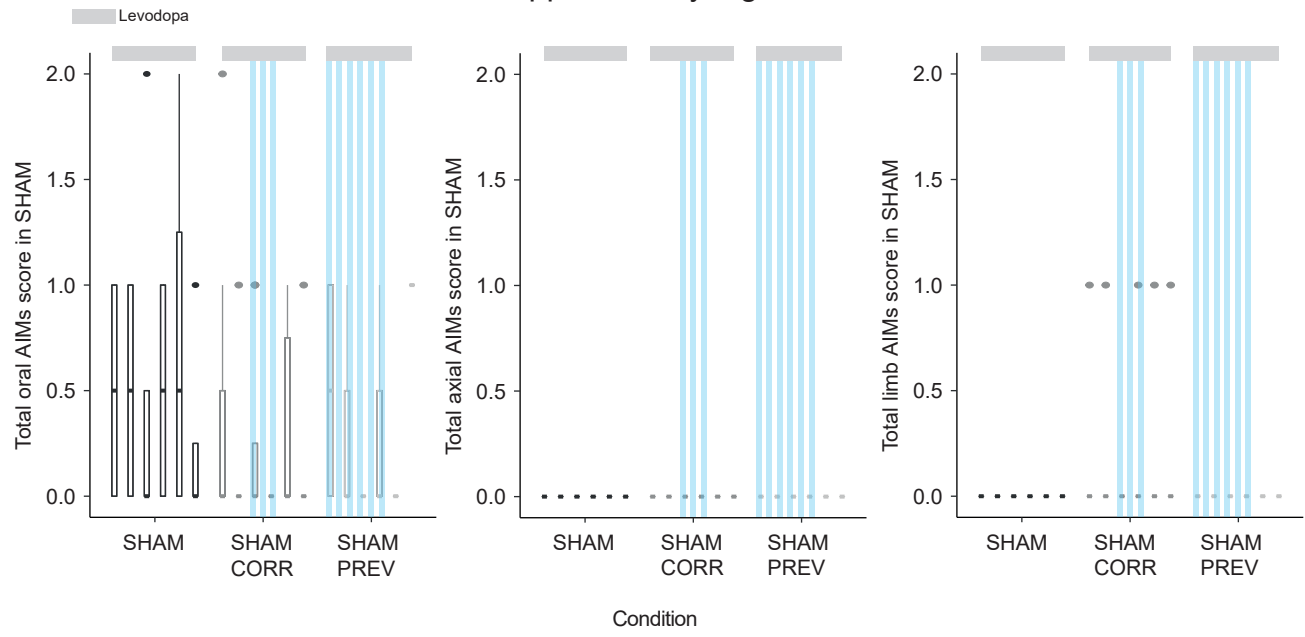

# Supplementary Fig. S5

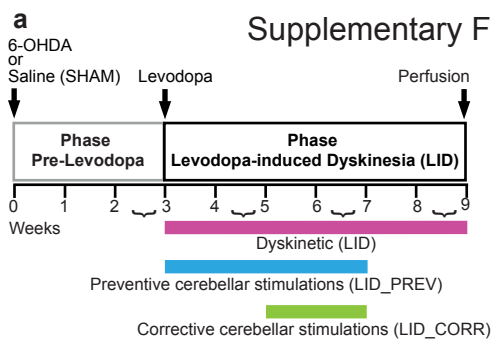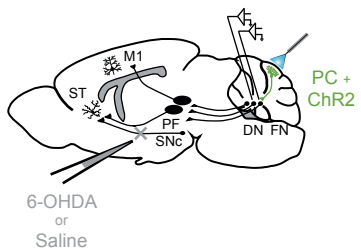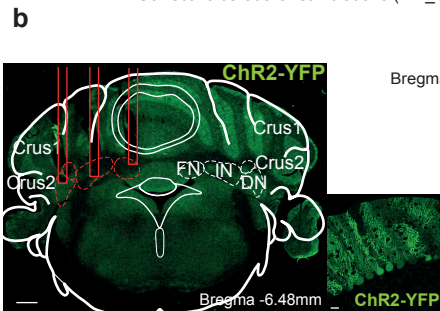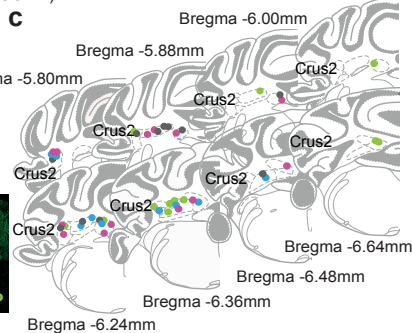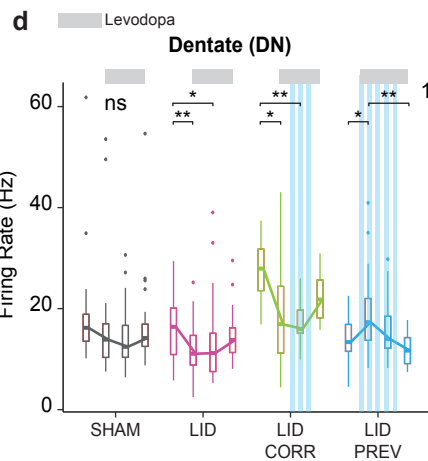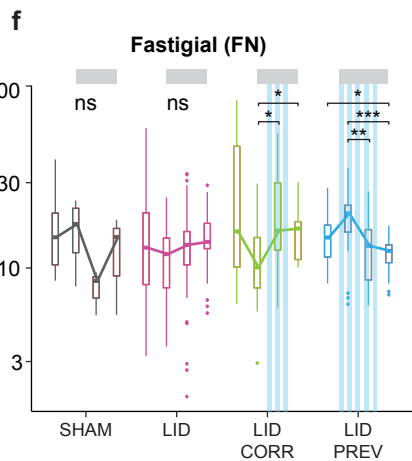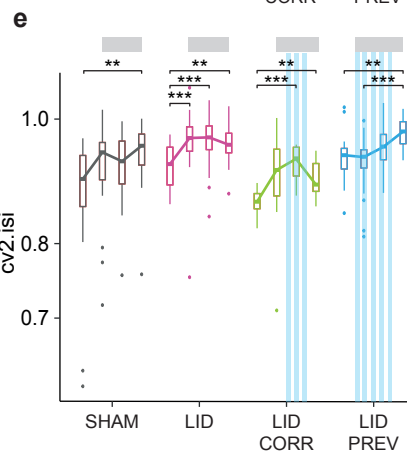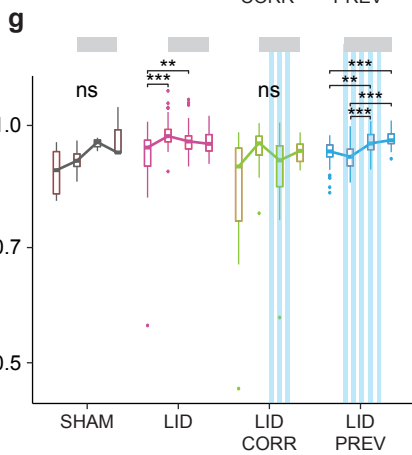

## **Influence of locomotion on DCN discharge**

As DCN activity is modulated by locomotion in normal animals (Sarnaik and Raman, 2018), we quantified the locomotor activity using DeepLabCut (Mathis et al., 2018) (**Supplementary Figure 6**) and tested if the activity observed in DCN correlated with a change in locomotor activity in control animals (**Supplementary Figure 7**). No differences were observed in the DCN during levodopa treatment in control animals, whether the animals were moving or not (**Supplementary Figure 7**).

## **Increased cv2.isi does not simply reflect increased bursting**

Since greater cv2.isi in LID mice may reflect irregular burst firing under levodopa treatment in DCN neurons, we analyzed the burst rate in periods of locomotor activity and inactivity. Surprisingly, the burst rate of dyskinetic mice decreased during levodopa treatment in periods of activity in the IN, DN, and FN (**Supplementary Figure 8a**). However, the burst rate of LID mice in periods of locomotor inactivity increased during levodopa treatment in the DN and FN (**Supplementary Figure 8b**).

PC stimulations during 4 weeks prevented the decreased of the burst rate in the IN during periods of locomotor activity (**Supplementary Figure 8a, left panel**). Changes, although less consistent, were also observed as a function of the motor state in the DN and FN (**Supplementary Figure 8a, middle and right panels**). Only mild differences were observed in the burst rate in the IN, DN or FN in the different groups during periods of locomotor inactivity (**Supplementary Figure 8b**).

## **References**

- Mathis, A., Mamidanna, P., Cury, K.M., Abe, T., Murthy, V.N., Mathis, M.W., and Bethge, M. (2018). DeepLabCut: markerless pose estimation of user-defined body parts with deep learning. *Nat Neurosci* 21, 1281-1289.
- Sarnaik, R., and Raman, I.M. (2018). Control of voluntary and optogenetically perturbed locomotion by spike rate and timing of neurons of the mouse cerebellar nuclei. *Elife* 7.

# Supplementary Fig. S6

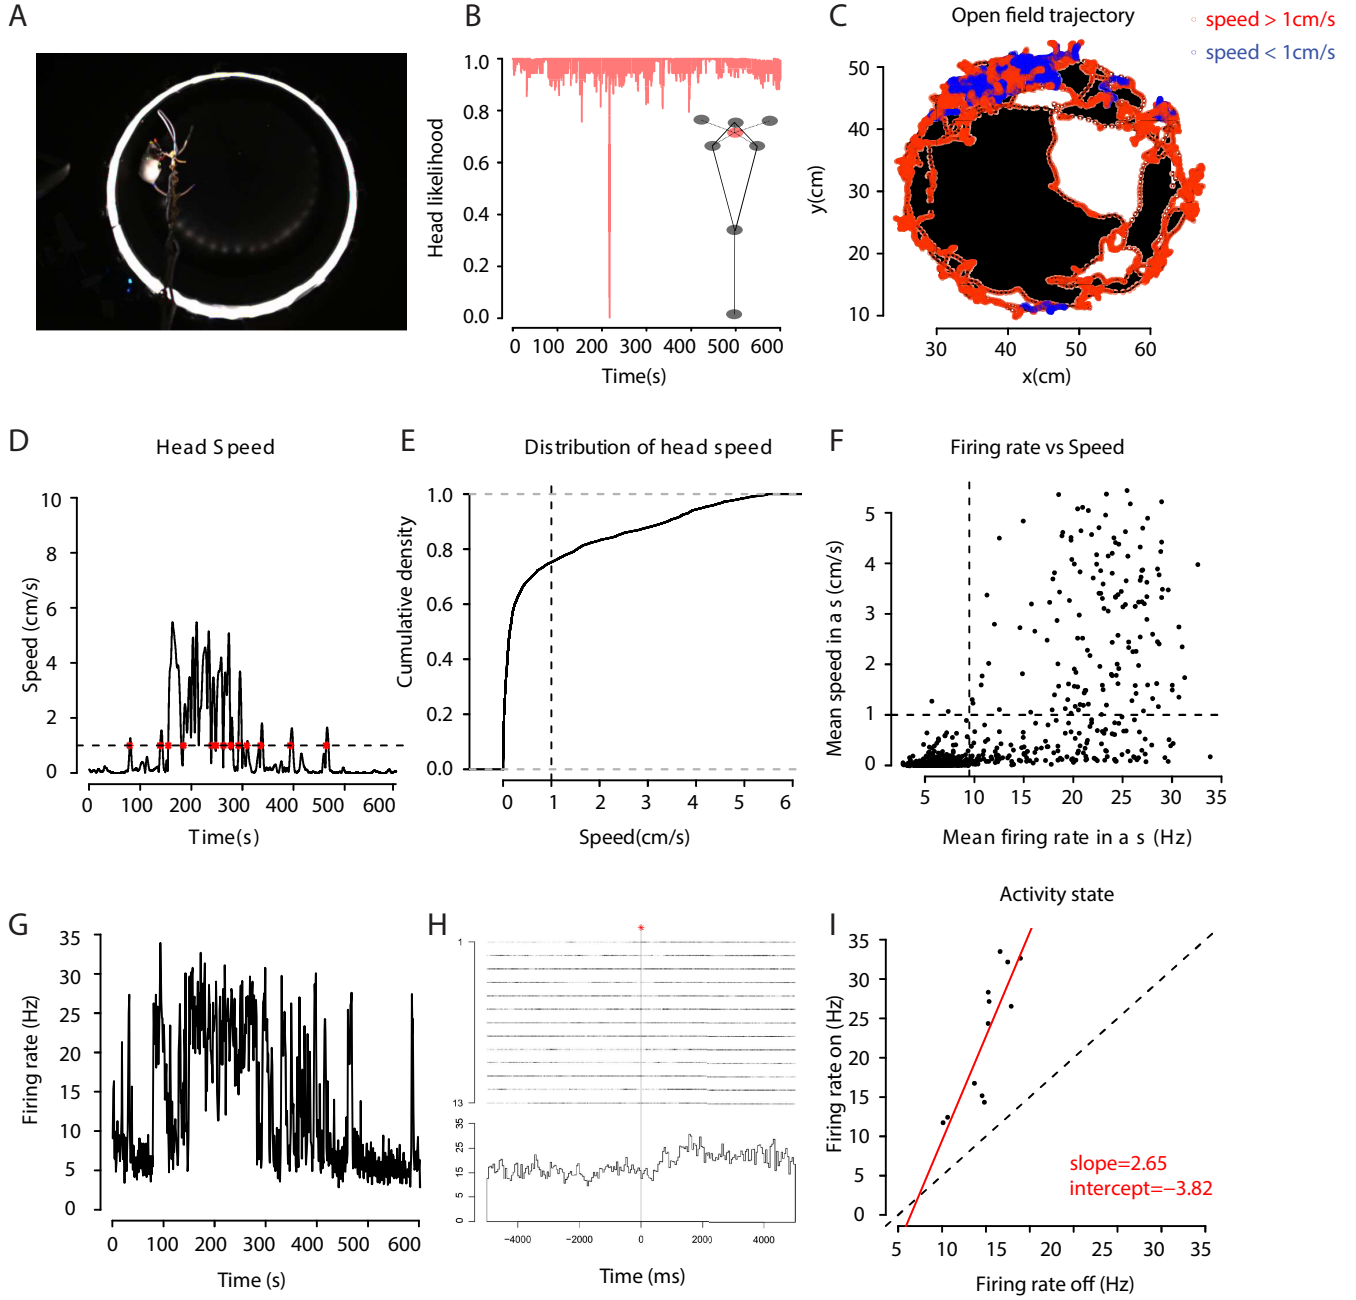



# Supplementary Fig. S8

**a**

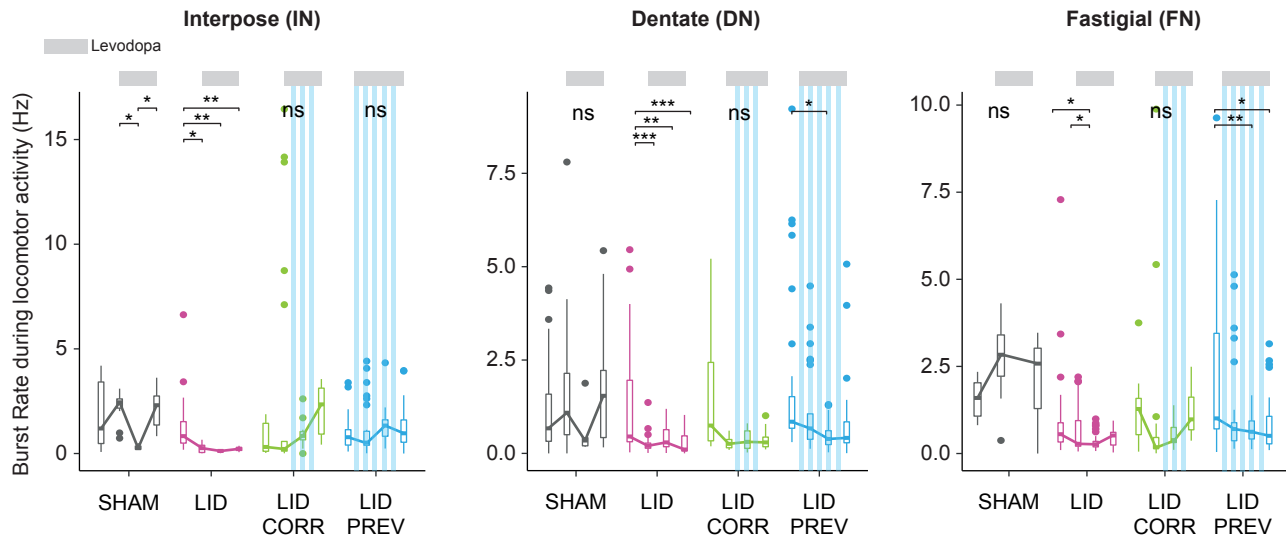

**b**

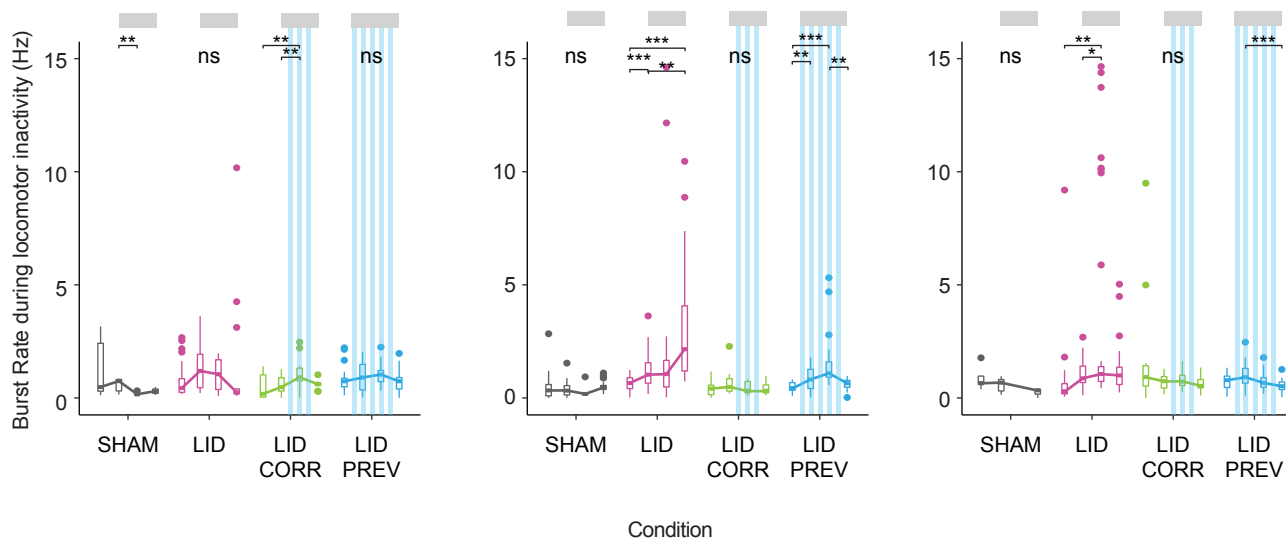

# Supplementary Fig. S9

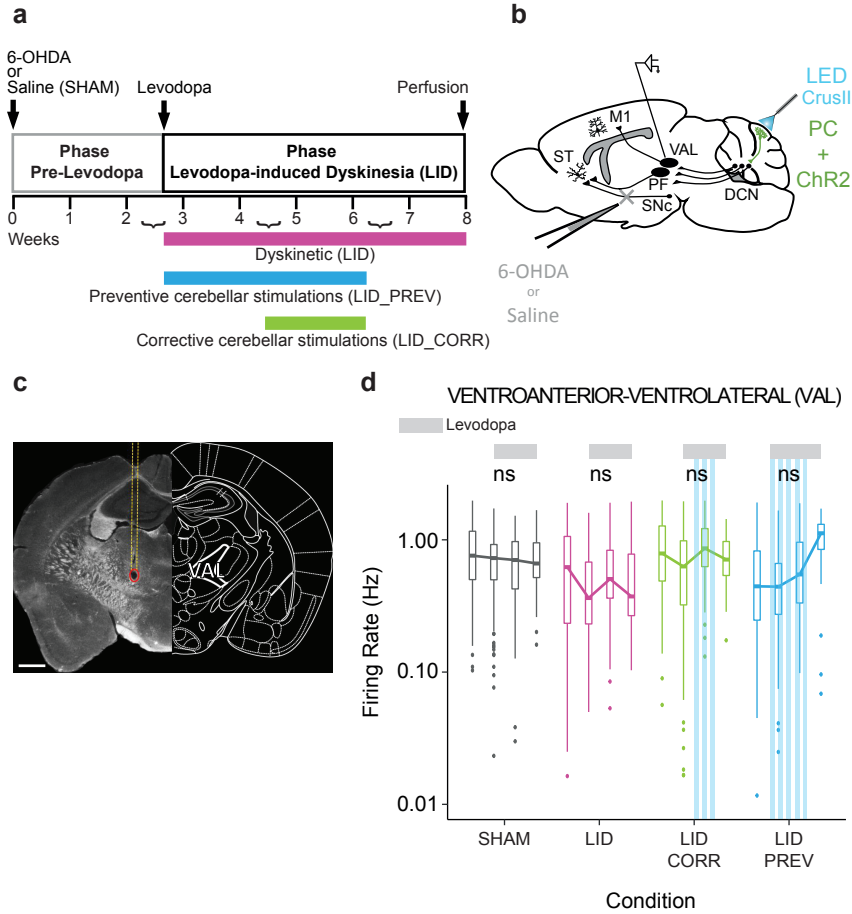



**Table S1: Precision measures, exact p-values, and replicate data relevant to Figure 1, and Supplementary Figure 1c**

| Fig     | Param        | Week | Group1   | Group2   | Mean1 | Mean2 | n1 | n2 | Sum | Adjusted p Value |
|---------|--------------|------|----------|----------|-------|-------|----|----|-----|------------------|
| Fig. 1c | 6OHDA lesion | /    | 6-OHDA   | SHAM     | 80.93 | 11.05 | 40 | 17 | *** | < 0.001          |
| Fig. 1e | Oral         | 4    | LID      | SHAM     | 8.84  | 0.42  | 19 | 19 | *** | < 0.001          |
|         |              |      | LID_CORR | SHAM     | 7.96  | 0.42  | 23 | 19 | *** | < 0.001          |
|         |              |      | LID_PREV | SHAM     | 1.59  | 0.42  | 17 | 19 | *   | 0.035            |
|         |              |      | LID_CORR | LID      | 7.96  | 8.84  | 23 | 19 | ns  | 0.711            |
|         |              |      | LID_PREV | LID      | 1.59  | 8.84  | 17 | 19 | ### | < 0.001          |
|         |              |      | LID_PREV | LID_CORR | 1.59  | 7.96  | 17 | 23 | &&& | < 0.001          |
| Fig. 1e | Oral         | 5    | LID      | SHAM     | 7.79  | 0.23  | 19 | 17 | *** | < 0.001          |
|         |              |      | LID_CORR | SHAM     | 9.20  | 0.23  | 15 | 17 | *** | < 0.001          |
|         |              |      | LID_PREV | SHAM     | 1.83  | 0.23  | 18 | 17 | **  | 0.002            |
|         |              |      | LID_CORR | LID      | 9.20  | 7.79  | 15 | 19 | ns  | 0.425            |
|         |              |      | LID_PREV | LID      | 1.83  | 7.79  | 18 | 19 | ### | < 0.001          |
|         |              |      | LID_PREV | LID_CORR | 1.83  | 9.20  | 18 | 15 | &&& | < 0.001          |
| Fig. 1e | Oral         | 6    | LID      | SHAM     | 8.31  | 0.23  | 19 | 19 | *** | < 0.001          |
|         |              |      | LID_CORR | SHAM     | 2.71  | 0.23  | 24 | 19 | *** | < 0.001          |
|         |              |      | LID_PREV | SHAM     | 0.94  | 0.23  | 18 | 19 | *   | 0.048            |
|         |              |      | LID_CORR | LID      | 2.71  | 8.31  | 24 | 19 | ### | < 0.001          |
|         |              |      | LID_PREV | LID      | 0.94  | 8.31  | 18 | 19 | ### | < 0.001          |
|         |              |      | LID_PREV | LID_CORR | 0.94  | 2.71  | 18 | 24 | &&  | 0.002            |

|         |       |   |          |          |      |      |    |    |     |         |
|---------|-------|---|----------|----------|------|------|----|----|-----|---------|
| Fig. 1e | Oral  | 7 | LID      | SHAM     | 8.37 | 0.20 | 19 | 15 | *** | < 0.001 |
|         |       |   | LID_CORR | SHAM     | 1.87 | 0.20 | 23 | 15 | *** | < 0.001 |
|         |       |   | LID_PREV | SHAM     | 0.78 | 0.20 | 18 | 15 | ns  | 0.127   |
|         |       |   | LID_CORR | LID      | 1.87 | 8.37 | 23 | 19 | ### | < 0.001 |
|         |       |   | LID_PREV | LID      | 0.78 | 8.37 | 18 | 19 | ### | < 0.001 |
|         |       |   | LID_PREV | LID_CORR | 0.78 | 1.87 | 18 | 23 | &   | 0.010   |
| Fig. 1e | Oral  | 8 | LID      | SHAM     | 8.74 | 0.35 | 19 | 17 | *** | < 0.001 |
|         |       |   | LID_CORR | SHAM     | 0.91 | 0.35 | 23 | 17 | ns  | 0.16    |
|         |       |   | LID_PREV | SHAM     | 0.78 | 0.35 | 18 | 17 | ns  | 0.43    |
|         |       |   | LID_CORR | LID      | 0.91 | 8.74 | 23 | 19 | ### | < 0.001 |
|         |       |   | LID_PREV | LID      | 0.78 | 8.74 | 18 | 19 | ### | < 0.001 |
|         |       |   | LID_PREV | LID_CORR | 0.78 | 0.91 | 18 | 23 | ns  | 0.43    |
| Fig. 1e | Oral  | 9 | LID      | SHAM     | 6.42 | 0.36 | 19 | 11 | *** | < 0.001 |
|         |       |   | LID_CORR | SHAM     | 1.31 | 0.36 | 16 | 11 | ns  | 0.053   |
|         |       |   | LID_PREV | SHAM     | 1.92 | 0.36 | 13 | 11 | **  | 0.004   |
|         |       |   | LID_CORR | LID      | 1.31 | 6.42 | 16 | 19 | ### | < 0.001 |
|         |       |   | LID_PREV | LID      | 1.92 | 6.42 | 13 | 19 | ### | < 0.001 |
|         |       |   | LID_PREV | LID_CORR | 1.92 | 1.31 | 13 | 16 | ns  | 0.219   |
| Fig. 1f | Axial | 4 | LID      | SHAM     | 8.12 | 0    | 8  | 12 | *** | <0.001  |
|         |       |   | LID_CORR | SHAM     | 5.07 | 0    | 14 | 12 | *** | <0.001  |
|         |       |   | LID_PREV | SHAM     | 2.40 | 0    | 5  | 12 | *** | <0.001  |
|         |       |   | LID_CORR | LID      | 5.07 | 8.12 | 14 | 8  | ns  | 0.077   |
|         |       |   | LID_PREV | LID      | 2.40 | 8.12 | 5  | 8  | #   | 0.018   |

|         |       |   |          |          |      |      |    |    |     |        |
|---------|-------|---|----------|----------|------|------|----|----|-----|--------|
|         |       |   | LID_PREV | LID_CORR | 2.40 | 5.07 | 5  | 14 | ns  | 0.219  |
| Fig. 1f | Axial | 5 | LID      | SHAM     | 9.00 | 0    | 6  | 9  | *** | <0.001 |
|         |       |   | LID_CORR | SHAM     | 5.40 | 0    | 5  | 9  | *** | <0.001 |
|         |       |   | LID_PREV | SHAM     | 5.83 | 0    | 6  | 9  | *** | <0.001 |
|         |       |   | LID_CORR | LID      | 5.40 | 9.00 | 5  | 6  | ns  | 0.190  |
|         |       |   | LID_PREV | LID      | 5.83 | 9.00 | 6  | 6  | ns  | 0.190  |
|         |       |   | LID_PREV | LID_CORR | 5.83 | 5.40 | 6  | 5  | ns  | 0.980  |
| Fig. 1f | Axial | 6 | LID      | SHAM     | 4.25 | 0    | 8  | 11 | *** | <0.001 |
|         |       |   | LID_CORR | SHAM     | 1.50 | 0    | 14 | 11 | **  | 0.006  |
|         |       |   | LID_PREV | SHAM     | 4.00 | 0    | 6  | 11 | *** | <0.001 |
|         |       |   | LID_CORR | LID      | 1.50 | 4.25 | 14 | 8  | ##  | 0.002  |
|         |       |   | LID_PREV | LID      | 4.00 | 4.25 | 6  | 8  | ns  | 0.610  |
|         |       |   | LID_PREV | LID_CORR | 4.00 | 1.50 | 6  | 14 | &&& | <0.001 |
| Fig. 1f | Axial | 7 | LID      | SHAM     | 4.62 | 0    | 8  | 11 | *** | <0.001 |
|         |       |   | LID_CORR | SHAM     | 1.36 | 0    | 14 | 11 | *   | 0.014  |
|         |       |   | LID_PREV | SHAM     | 1.33 | 0    | 6  | 11 | **  | 0.004  |
|         |       |   | LID_CORR | LID      | 1.36 | 4.62 | 14 | 8  | ##  | 0.002  |
|         |       |   | LID_PREV | LID      | 1.33 | 4.62 | 6  | 8  | #   | 0.030  |
|         |       |   | LID_PREV | LID_CORR | 1.33 | 1.36 | 6  | 14 | ns  | 0.586  |
| Fig. 1f | Axial | 8 | LID      | SHAM     | 4.37 | 0    | 8  | 11 | *** | <0.001 |
|         |       |   | LID_CORR | SHAM     | 1.36 | 0    | 14 | 11 | *   | 0.011  |
|         |       |   | LID_PREV | SHAM     | 2.67 | 0    | 6  | 11 | *** | <0.001 |
|         |       |   | LID_CORR | LID      | 1.36 | 4.37 | 14 | 8  | ##  | 0.001  |

|         |       |   |          |          |      |      |    |    |     |        |
|---------|-------|---|----------|----------|------|------|----|----|-----|--------|
|         |       |   | LID_PREV | LID      | 2.67 | 4.37 | 6  | 8  | ns  | 0.628  |
|         |       |   | LID_PREV | LID_CORR | 2.67 | 1.36 | 6  | 14 | &&  | 0.001  |
| Fig. 1f | Axial | 9 | LID      | SHAM     | 5.85 | 0    | 8  | 11 | *** | <0.001 |
|         |       |   | LID_CORR | SHAM     | 1.27 | 0    | 11 | 11 | **  | 0.005  |
|         |       |   | LID_PREV | SHAM     | 2.83 | 0    | 6  | 11 | *** | <0.001 |
|         |       |   | LID_CORR | LID      | 1.27 | 5.85 | 11 | 8  | ##  | 0.001  |
|         |       |   | LID_PREV | LID      | 2.83 | 5.85 | 6  | 8  | ns  | 0.246  |
|         |       |   | LID_PREV | LID_CORR | 2.83 | 1.27 | 6  | 11 | &   | 0.021  |
| Fig. 1g | Limb  | 4 | LID      | SHAM     | 3.89 | 0.07 | 9  | 14 | *** | <0.001 |
|         |       |   | LID_CORR | SHAM     | 1.20 | 0.07 | 15 | 14 | *** | <0.001 |
|         |       |   | LID_PREV | SHAM     | 3.12 | 0.07 | 8  | 14 | *** | <0.001 |
|         |       |   | LID_CORR | LID      | 1.20 | 3.89 | 15 | 9  | ##  | 0.003  |
|         |       |   | LID_PREV | LID      | 3.12 | 3.89 | 8  | 9  | ns  | 0.981  |
|         |       |   | LID_PREV | LID_CORR | 3.12 | 1.20 | 8  | 15 | &&  | 0.002  |
| Fig. 1g | Limb  | 5 | LID      | SHAM     | 3.57 | 0.09 | 7  | 11 | *** | <0.001 |
|         |       |   | LID_CORR | SHAM     | 0.83 | 0.09 | 6  | 11 | *   | 0.034  |
|         |       |   | LID_PREV | SHAM     | 2.67 | 0.09 | 9  | 11 | *** | <0.001 |
|         |       |   | LID_CORR | LID      | 0.83 | 3.57 | 6  | 7  | ##  | 0.004  |
|         |       |   | LID_PREV | LID      | 2.67 | 3.57 | 9  | 7  | ns  | 0.375  |
|         |       |   | LID_PREV | LID_CORR | 2.67 | 0.83 | 9  | 6  | &   | 0.015  |
| Fig. 1g | Limb  | 6 | LID      | SHAM     | 4.22 | 0    | 9  | 13 | *** | <0.001 |
|         |       |   | LID_CORR | SHAM     | 1.53 | 0    | 15 | 13 | *** | <0.001 |
|         |       |   | LID_PREV | SHAM     | 2.89 | 0    | 9  | 13 | *** | <0.001 |

|                |      |   |          |          |      |      |    |    |     |        |
|----------------|------|---|----------|----------|------|------|----|----|-----|--------|
|                |      |   | LID_CORR | LID      | 1.53 | 4.22 | 15 | 9  | ### | <0.001 |
|                |      |   | LID_PREV | LID      | 2.89 | 4.22 | 9  | 9  | ns  | 0.476  |
|                |      |   | LID_PREV | LID_CORR | 2.89 | 1.53 | 9  | 15 | &&  | 0.003  |
| Fig. 1g        | Limb | 7 | LID      | SHAM     | 3.44 | 0.08 | 9  | 12 | *** | <0.001 |
|                |      |   | LID_CORR | SHAM     | 0.86 | 0.08 | 14 | 12 | **  | 0.004  |
|                |      |   | LID_PREV | SHAM     | 1.22 | 0.08 | 9  | 12 | *** | <0.001 |
|                |      |   | LID_CORR | LID      | 0.86 | 3.44 | 14 | 9  | ### | <0.001 |
|                |      |   | LID_PREV | LID      | 1.22 | 3.44 | 9  | 9  | #   | 0.018  |
|                |      |   | LID_PREV | LID_CORR | 1.22 | 0.86 | 9  | 14 | ns  | 0.302  |
| Fig. 1g        | Limb | 8 | LID      | SHAM     | 2.22 | 0.08 | 9  | 12 | *** | <0.001 |
|                |      |   | LID_CORR | SHAM     | 0.28 | 0.08 | 14 | 12 | ns  | 0.264  |
|                |      |   | LID_PREV | SHAM     | 2.00 | 0.08 | 9  | 12 | *** | <0.001 |
|                |      |   | LID_CORR | LID      | 0.28 | 2.22 | 14 | 9  | ### | <0.001 |
|                |      |   | LID_PREV | LID      | 2.00 | 2.22 | 9  | 9  | ns  | 0.852  |
|                |      |   | LID_PREV | LID_CORR | 2.00 | 0.28 | 9  | 14 | &&& | <0.001 |
| Fig. 1g        | Limb | 9 | LID      | SHAM     | 1.89 | 0.08 | 9  | 12 | *** | <0.001 |
|                |      |   | LID_CORR | SHAM     | 0.09 | 0.08 | 11 | 12 | ns  | 0.936  |
|                |      |   | LID_PREV | SHAM     | 0.87 | 0.08 | 8  | 12 | *   | 0.014  |
|                |      |   | LID_CORR | LID      | 0.09 | 1.89 | 11 | 9  | ### | <0.001 |
|                |      |   | LID_PREV | LID      | 0.87 | 1.89 | 8  | 9  | ns  | 0.291  |
|                |      |   | LID_PREV | LID_CORR | 0.87 | 0.09 | 8  | 11 | &   | 0.018  |
| Supp.<br>Fig1c | Oral | 4 | LID      | SHAM     | 0.62 | 0    | 8  | 7  | ns  | 0.160  |

|       |      |   |          |          |      |      |   |   |    |       |
|-------|------|---|----------|----------|------|------|---|---|----|-------|
|       |      |   | LID_CORR | SHAM     | 1.20 | 0    | 5 | 7 | ns | 0.150 |
|       |      |   | LID_PREV | SHAM     | 0    | 0    | 5 | 7 | -  | -     |
|       |      |   | LID_CORR | LID      | 1.20 | 0.62 | 5 | 8 | ns | 0.370 |
|       |      |   | LID_PREV | LID      | 0    | 0.62 | 5 | 8 | ns | 0.210 |
|       |      |   | LID_PREV | LID_CORR | 0    | 1.20 | 5 | 5 | ns | 0.160 |
| Supp. | Oral | 5 | LID      | SHAM     | 0.62 | 0    | 8 | 6 | ns | 0.157 |
| Fig1c |      |   | LID_CORR | SHAM     | 0.83 | 0    | 6 | 6 | ns | 0.067 |
|       |      |   | LID_PREV | SHAM     | 0    | 0    | 6 | 6 | -  | -     |
|       |      |   | LID_CORR | LID      | 0.83 | 0.62 | 6 | 8 | ns | 0.575 |
|       |      |   | LID_PREV | LID      | 0    | 0.62 | 6 | 8 | ns | 0.157 |
|       |      |   | LID_PREV | LID_CORR | 0    | 0.83 | 6 | 6 | ns | 0.067 |
| Supp. | Oral | 6 | LID      | SHAM     | 0.75 | 0.17 | 8 | 6 | ns | 0.330 |
| Fig1c |      |   | LID_CORR | SHAM     | 0    | 0.17 | 6 | 6 | ns | 0.400 |
|       |      |   | LID_PREV | SHAM     | 0    | 0.17 | 6 | 6 | ns | 0.400 |
|       |      |   | LID_CORR | LID      | 0    | 0.75 | 6 | 8 | ns | 0.160 |
|       |      |   | LID_PREV | LID      | 0    | 0.75 | 6 | 8 | ns | 0.160 |
|       |      |   | LID_PREV | LID_CORR | 0    | 0    | 6 | 6 | -  | -     |
| Supp. | Oral | 7 | LID      | SHAM     | 1.12 | 0.17 | 8 | 6 | *  | 0.028 |
| Fig1c |      |   | LID_CORR | SHAM     | 0.17 | 0.17 | 6 | 6 | ns | 1     |
|       |      |   | LID_PREV | SHAM     | 0.17 | 0.17 | 6 | 6 | ns | 1     |
|       |      |   | LID_CORR | LID      | 0.17 | 1.12 | 6 | 8 | #  | 0.028 |
|       |      |   | LID_PREV | LID      | 0.17 | 1.12 | 6 | 8 | #  | 0.028 |
|       |      |   | LID_PREV | LID_CORR | 0.17 | 0.17 | 6 | 6 | ns | 1     |

|                |      |   |          |          |      |      |   |   |    |       |
|----------------|------|---|----------|----------|------|------|---|---|----|-------|
| Supp.<br>Fig1c | Oral | 8 | LID      | SHAM     | 1.12 | 0.33 | 8 | 6 | ns | 0.490 |
|                |      |   | LID_CORR | SHAM     | 0.17 | 0.33 | 6 | 6 | ns | 0.590 |
|                |      |   | LID_PREV | SHAM     | 0    | 0.33 | 6 | 6 | ns | 0.350 |
|                |      |   | LID_CORR | LID      | 0.17 | 1.12 | 6 | 8 | ns | 0.350 |
|                |      |   | LID_PREV | LID      | 0    | 1.12 | 6 | 8 | ns | 0.350 |
|                |      |   | LID_PREV | LID_CORR | 0    | 0.17 | 6 | 6 | ns | 0.49  |
| Supp.<br>Fig1c | Oral | 9 | LID      | SHAM     | 1.12 | 0.33 | 8 | 6 | ns | 0.550 |
|                |      |   | LID_CORR | SHAM     | 0.33 | 0.33 | 6 | 6 | ns | 0.900 |
|                |      |   | LID_PREV | SHAM     | 0.50 | 0.33 | 6 | 6 | ns | 0.920 |
|                |      |   | LID_CORR | LID      | 0.33 | 1.12 | 6 | 8 | ns | 0.550 |
|                |      |   | LID_PREV | LID      | 0.50 | 1.12 | 6 | 8 | ns | 0.590 |
|                |      |   | LID_PREV | LID_CORR | 0.50 | 0.33 | 6 | 6 | ns | 0.900 |

**Table S2: Number of cells and mice in each condition per week for the three deep cerebellar nuclei. Related to Figure 2 and Supplementary Figure 5.**

| All cell (DCN) | Region | Interposed |      | Dentate |      | Fastigial |      |
|----------------|--------|------------|------|---------|------|-----------|------|
|                |        | Cells      | Mice | Cells   | Mice | Cells     | Mice |
| SHAM           | W2-W3  | n=10       | N=1  | n=28    | N=2  | n=7       | N=1  |
|                | W4-W5  | n=11       | N=1  | n=30    | N=2  | n=8       | N=1  |
|                | W6-W7  | n=10       | N=1  | n=24    | N=2  | n=3       | N=1  |
|                | W8-W9  | n=9        | N=1  | n=28    | N=2  | n=3       | N=1  |
| LID            | W2-W3  | n=25       | N=3  | n=41    | N=4  | n=41      | N=5  |
|                | W4-W5  | n=8        | N=2  | n=33    | N=4  | n=42      | N=5  |
|                | W6-W7  | n=10       | N=3  | n=24    | N=3  | n=49      | N=6  |
|                | W8-W9  | n=13       | N=3  | n=30    | N=4  | n=27      | N=4  |
| LID_CORR       | W2-W3  | n=19       | N=2  | n=12    | N=1  | n=15      | N=3  |
|                | W4-W5  | n=24       | N=3  | n=17    | N=2  | n=22      | N=3  |



|          |       |      |     |      |     |      |     |
|----------|-------|------|-----|------|-----|------|-----|
|          | W6-W7 | n=12 | N=2 | n=10 | N=1 | n=20 | N=3 |
|          | W8-W9 | n=11 | N=2 | n=12 | N=1 | n=17 | N=3 |
| LID_PREV | W2-W3 | n=31 | N=3 | n=34 | N=3 | n=31 | N=3 |
|          | W4-W5 | n=32 | N=3 | n=26 | N=3 | n=32 | N=3 |
|          | W6-W7 | n=26 | N=3 | n=25 | N=3 | n=32 | N=3 |
|          | W8-W9 | n=27 | N=3 | n=16 | N=3 | n=29 | N=3 |

**Table S3: Precision measures, exact p-values, and replicate data relevant to Figure 2d and Supplementary Figures 5d and 5f.**

| Fig     | Reg | Group | Weeks1 | Weeks2 | Mean1    | Mean2    | n1 | n2 | Sum | Adjusted p Value |
|---------|-----|-------|--------|--------|----------|----------|----|----|-----|------------------|
| Fig. 2d | IN  | SHAM  | W2-W3  | W4-W5  | 19.68 Hz | 14.05 Hz | 10 | 11 | ns  | 0.973            |
|         |     |       | W2-W3  | W6-W7  | 19.68 Hz | 9.24 Hz  | 10 | 10 | ns  | 0.283            |
|         |     |       | W2-W3  | W8-W9  | 19.68 Hz | 20.48 Hz | 10 | 9  | ns  | 0.841            |
|         |     |       | W4-W5  | W6-W7  | 14.05 Hz | 9.24 Hz  | 11 | 10 | ns  | 0.492            |
|         |     |       | W4-W5  | W8-W9  | 14.05 Hz | 20.48 Hz | 11 | 9  | ns  | 0.591            |
|         |     |       | W6-W7  | W8-W9  | 9.24 Hz  | 20.48 Hz | 10 | 9  | ns  | 0.063            |
| Fig. 2d | IN  | LID   | W2-W3  | W4-W5  | 17.35 Hz | 9.75 Hz  | 25 | 8  | ns  | 0.338            |
|         |     |       | W2-W3  | W6-W7  | 17.35 Hz | 8.50 Hz  | 25 | 10 | *   | 0.023            |
|         |     |       | W2-W3  | W8-W9  | 17.35 Hz | 10.64 Hz | 25 | 13 | ns  | 0.147            |
|         |     |       | W4-W5  | W6-W7  | 9.75 Hz  | 8.50 Hz  | 8  | 10 | ns  | 0.812            |
|         |     |       | W4-W5  | W8-W9  | 9.75 Hz  | 10.64 Hz | 8  | 13 | ns  | 0.999            |
|         |     |       | W6-W7  | W8-W9  | 8.50 Hz  | 10.64 Hz | 10 | 13 | ns  | 0.818            |
| Fig. 2d | IN  | LID   | W2-W3  | W4-W5  | 26.52 Hz | 18.81 Hz | 19 | 24 | *   | 0.031            |

|         |    |      |       |       |          |          |    |    |    |       |
|---------|----|------|-------|-------|----------|----------|----|----|----|-------|
|         |    | CORR | W2-W3 | W6-W7 | 26.52 Hz | 32.37 Hz | 19 | 12 | ns | 0.927 |
|         |    |      | W2-W3 | W8-W9 | 26.52 Hz | 22.67 Hz | 19 | 11 | ns | 0.722 |
|         |    |      | W4-W5 | W6-W7 | 18.81 Hz | 32.37 Hz | 24 | 12 | *  | 0.015 |
|         |    |      | W4-W5 | W8-W9 | 18.81 Hz | 22.67 Hz | 24 | 11 | ns | 0.567 |
|         |    |      | W6-W7 | W8-W9 | 32.37 Hz | 22.67 Hz | 12 | 11 | ns | 0.448 |
| Fig. 2d | IN | LID  | W2-W3 | W4-W5 | 17.50 Hz | 19.78 Hz | 31 | 32 | ns | 0.998 |
|         |    | PREV | W2-W3 | W6-W7 | 17.50 Hz | 21.47 Hz | 31 | 26 | ns | 0.403 |
|         |    |      | W2-W3 | W8-W9 | 17.50 Hz | 20.12 Hz | 31 | 27 | ns | 0.978 |
|         |    |      | W4-W5 | W6-W7 | 19.78 Hz | 21.47 Hz | 32 | 26 | ns | 0.488 |
|         |    |      | W4-W5 | W8-W9 | 19.78 Hz | 20.12 Hz | 32 | 27 | ns | 0.994 |
|         |    |      | W6-W7 | W8-W9 | 21.47 Hz | 20.12 Hz | 26 | 27 | ns | 0.672 |
| Fig.    | DN | SHAM | W2-W3 | W4-W5 | 18.31 HZ | 16.05 Hz | 28 | 30 | ns | 0.376 |
| Supp5d  |    |      | W2-W3 | W6-W7 | 18.31 HZ | 14.55 Hz | 28 | 24 | ns | 0.178 |
|         |    |      | W2-W3 | W8-W9 | 18.31 HZ | 16.56 Hz | 28 | 28 | ns | 0.791 |
|         |    |      | W4-W5 | W6-W7 | 16.05 Hz | 14.55 Hz | 30 | 24 | ns | 0.951 |
|         |    |      | W4-W5 | W8-W9 | 16.05 Hz | 16.56 Hz | 30 | 28 | ns | 0.908 |
|         |    |      | W6-W7 | W8-W9 | 14.55 Hz | 16.56 Hz | 24 | 28 | ns | 0.656 |
| Fig.    | DN | LID  | W2-W3 | W4-W5 | 16.39 Hz | 12.11 Hz | 41 | 33 | ** | 0.007 |
| Supp5d  |    |      | W2-W3 | W6-W7 | 16.39 Hz | 13.14 Hz | 41 | 24 | *  | 0.033 |
|         |    |      | W2-W3 | W8-W9 | 16.39 Hz | 14.30 Hz | 41 | 30 | ns | 0.674 |
|         |    |      | W4-W5 | W6-W7 | 12.11 Hz | 13.14 Hz | 33 | 24 | ns | 0.997 |
|         |    |      | W4-W5 | W8-W9 | 12.11 Hz | 14.30 Hz | 33 | 30 | ns | 0.210 |
|         |    |      | W6-W7 | W8-W9 | 13.14 Hz | 14.30 Hz | 24 | 30 | ns | 0.381 |

|                |    |             |       |       |          |          |    |    |    |       |
|----------------|----|-------------|-------|-------|----------|----------|----|----|----|-------|
| Fig.<br>Supp5d | DN | LID<br>CORR | W2-W3 | W4-W5 | 27.49 Hz | 17.61 Hz | 12 | 17 | *  | 0.015 |
|                |    |             | W2-W3 | W6-W7 | 27.49 Hz | 17.15 Hz | 12 | 10 | ** | 0.002 |
|                |    |             | W2-W3 | W8-W9 | 27.49 Hz | 22.39 Hz | 12 | 12 | ns | 0.181 |
|                |    |             | W4-W5 | W6-W7 | 17.61 Hz | 17.15 Hz | 17 | 10 | ns | 0.866 |
|                |    |             | W4-W5 | W8-W9 | 17.61 Hz | 22.39 Hz | 17 | 12 | ns | 0.137 |
|                |    |             | W6-W7 | W8-W9 | 17.15 Hz | 22.39 Hz | 10 | 12 | ns | 0.089 |
| Fig.<br>Supp5d | DN | LID<br>PREV | W2-W3 | W4-W5 | 13.77 Hz | 18.40 Hz | 34 | 26 | *  | 0.017 |
|                |    |             | W2-W3 | W6-W7 | 13.77 Hz | 15.73 Hz | 34 | 25 | ns | 0.431 |
|                |    |             | W2-W3 | W8-W9 | 13.77 Hz | 11.77 Hz | 34 | 16 | ns | 0.586 |
|                |    |             | W4-W5 | W6-W7 | 18.40 Hz | 15.73 Hz | 26 | 25 | ns | 0.520 |
|                |    |             | W4-W5 | W8-W9 | 18.40 Hz | 11.77 Hz | 26 | 16 | ** | 0.002 |
|                |    |             | W6-W7 | W8-W9 | 15.73 Hz | 11.77 Hz | 25 | 16 | ns | 0.075 |
| Fig.<br>Supp5f | FN | SHAM        | W2-W3 | W4-W5 | 17.24 Hz | 15.96 Hz | 7  | 8  | ns | 1     |
|                |    |             | W2-W3 | W6-W7 | 17.24 Hz | 7.49 Hz  | 7  | 3  | ns | 0.191 |
|                |    |             | W2-W3 | W8-W9 | 17.24 Hz | 12.48 Hz | 7  | 3  | ns | 0.807 |
|                |    |             | W4-W5 | W6-W7 | 15.96 Hz | 7.49 Hz  | 8  | 3  | ns | 0.193 |
|                |    |             | W4-W5 | W8-W9 | 15.96 Hz | 12.48 Hz | 8  | 3  | ns | 0.821 |
|                |    |             | W6-W7 | W8-W9 | 7.49 Hz  | 12.48 Hz | 3  | 3  | ns | 0.739 |
| Fig.<br>Supp5f | FN | LID         | W2-W3 | W4-W5 | 14.84 Hz | 11.20 Hz | 41 | 42 | ns | 0.467 |
|                |    |             | W2-W3 | W6-W7 | 14.84 Hz | 13.85 Hz | 41 | 49 | ns | 0.998 |
|                |    |             | W2-W3 | W8-W9 | 14.84 Hz | 14.75 Hz | 41 | 27 | ns | 0.843 |
|                |    |             | W4-W5 | W6-W7 | 11.20 Hz | 13.85 Hz | 42 | 49 | ns | 0.527 |
|                |    |             | W4-W5 | W8-W9 | 11.20 Hz | 14.75 Hz | 42 | 27 | ns | 0.150 |

|                |    |      |       |       |          |          |    |    |     |        |
|----------------|----|------|-------|-------|----------|----------|----|----|-----|--------|
|                |    |      | W6-W7 | W8-W9 | 13.85 Hz | 14.75 Hz | 49 | 27 | ns  | 0.754  |
| Fig.<br>Supp5d | FN | LID  | W2-W3 | W4-W5 | 29.90 Hz | 12.07 Hz | 15 | 22 | ns  | 0.075  |
|                |    | CORR | W2-W3 | W6-W7 | 29.90 Hz | 20.21 Hz | 15 | 20 | ns  | 0.898  |
|                |    |      | W2-W3 | W8-W9 | 29.90 Hz | 16.44 Hz | 15 | 17 | ns  | 0.679  |
|                |    |      | W4-W5 | W6-W7 | 12.07 Hz | 20.21 Hz | 22 | 20 | *   | 0.042  |
|                |    |      | W4-W5 | W8-W9 | 12.07 Hz | 16.44 Hz | 22 | 17 | *   | 0.041  |
|                |    |      | W6-W7 | W8-W9 | 20.21 Hz | 16.44 Hz | 20 | 17 | ns  | 0.935  |
| Fig.<br>Supp5d | FN | LID  | W2-W3 | W4-W5 | 15.11 Hz | 19.29 Hz | 31 | 32 | ns  | 0.095  |
|                |    | PREV | W2-W3 | W6-W7 | 15.11 Hz | 12.95 Hz | 31 | 32 | ns  | 0.212  |
|                |    |      | W2-W3 | W8-W9 | 15.11 Hz | 11.77 Hz | 31 | 29 | *   | 0.016  |
|                |    |      | W4-W5 | W6-W7 | 19.29 Hz | 12.95 Hz | 32 | 32 | **  | 0.001  |
|                |    |      | W4-W5 | W8-W9 | 19.29 Hz | 11.77 Hz | 32 | 29 | *** | <0.001 |
|                |    |      | W6-W7 | W8-W9 | 12.95 Hz | 11.77 Hz | 32 | 29 | ns  | 0.960  |

**Table S4: Precision measures, exact p-values, and replicate date relevant to Figure 2e and Supplementary Figures 5e and 5g.**

| Fig     | Reg | Group | Weeks1 | Weeks2 | Mean1 | Mean2 | n1 | n2 | Sum | Adjusted p Value |
|---------|-----|-------|--------|--------|-------|-------|----|----|-----|------------------|
| Fig. 2e | IN  | SHAM  | W2-W3  | W4-W5  | 0.882 | 0.947 | 10 | 11 | ns  | 0.166            |
|         |     |       | W2-W3  | W6-W7  | 0.882 | 0.959 | 10 | 10 | ns  | 0.089            |
|         |     |       | W2-W3  | W8-W9  | 0.882 | 0.929 | 10 | 9  | ns  | 0.482            |
|         |     |       | W4-W5  | W6-W7  | 0.947 | 0.959 | 11 | 10 | ns  | 0.982            |
|         |     |       | W4-W5  | W8-W9  | 0.947 | 0.929 | 11 | 9  | ns  | 0.935            |
|         |     |       | W6-W7  | W8-W9  | 0.959 | 0.929 | 10 | 9  | ns  | 0.791            |

|             |    |      |       |       |       |       |    |    |     |        |
|-------------|----|------|-------|-------|-------|-------|----|----|-----|--------|
| Fig. 2e     | IN | LID  | W2-W3 | W4-W5 | 0.859 | 1.017 | 25 | 8  | **  | 0.003  |
|             |    |      | W2-W3 | W6-W7 | 0.859 | 1.023 | 25 | 10 | *** | <0.001 |
|             |    |      | W2-W3 | W8-W9 | 0.859 | 1.018 | 25 | 13 | *** | <0.001 |
|             |    |      | W4-W5 | W6-W7 | 1.017 | 1.023 | 8  | 10 | ns  | 0.999  |
|             |    |      | W4-W5 | W8-W9 | 1.017 | 1.018 | 8  | 13 | ns  | 1      |
|             |    |      | W6-W7 | W8-W9 | 1.023 | 1.018 | 10 | 13 | ns  | 0.999  |
| Fig. 2e     | IN | CORR | W2-W3 | W4-W5 | 0.855 | 0.932 | 19 | 24 | *   | 0.031  |
|             |    |      | W2-W3 | W6-W7 | 0.855 | 0.834 | 19 | 12 | ns  | 0.906  |
|             |    |      | W2-W3 | W8-W9 | 0.855 | 0.914 | 19 | 11 | ns  | 0.307  |
|             |    |      | W4-W5 | W6-W7 | 0.932 | 0.834 | 24 | 12 | *   | 0.013  |
|             |    |      | W4-W5 | W8-W9 | 0.932 | 0.914 | 24 | 11 | ns  | 0.942  |
|             |    |      | W6-W7 | W8-W9 | 0.834 | 0.914 | 12 | 11 | ns  | 0.139  |
| Fig. 2e     | IN | PREV | W2-W3 | W4-W5 | 0.891 | 0.894 | 31 | 32 | ns  | 0.998  |
|             |    |      | W2-W3 | W6-W7 | 0.891 | 0.895 | 31 | 26 | ns  | 0.998  |
|             |    |      | W2-W3 | W8-W9 | 0.891 | 0.910 | 31 | 27 | ns  | 0.713  |
|             |    |      | W4-W5 | W6-W7 | 0.894 | 0.895 | 32 | 26 | ns  | 1      |
|             |    |      | W4-W5 | W8-W9 | 0.894 | 0.910 | 32 | 27 | ns  | 0.802  |
|             |    |      | W6-W7 | W8-W9 | 0.895 | 0.910 | 26 | 27 | ns  | 0.832  |
| Fig. Supp5e | DN | SHAM | W2-W3 | W4-W5 | 0.877 | 0.920 | 31 | 32 | ns  | 0.069  |
|             |    |      | W2-W3 | W6-W7 | 0.877 | 0.920 | 31 | 24 | ns  | 0.093  |
|             |    |      | W2-W3 | W8-W9 | 0.877 | 0.943 | 31 | 30 | **  | 0.002  |
|             |    |      | W4-W5 | W6-W7 | 0.920 | 0.920 | 32 | 24 | ns  | 1      |
|             |    |      | W4-W5 | W8-W9 | 0.920 | 0.943 | 32 | 30 | ns  | 0.552  |

|        |    |      |       |       |       |       |    |    |     |        |
|--------|----|------|-------|-------|-------|-------|----|----|-----|--------|
|        |    |      | W6-W7 | W8-W9 | 0.920 | 0.943 | 24 | 30 | ns  | 0.603  |
| Fig.   | DN | LID  | W2-W3 | W4-W5 | 0.920 | 0.961 | 41 | 33 | *** | <0.001 |
| Supp5e |    |      | W2-W3 | W6-W7 | 0.920 | 0.961 | 41 | 24 | *** | <0.001 |
|        |    |      | W2-W3 | W8-W9 | 0.920 | 0.956 | 41 | 30 | **  | 0.001  |
|        |    |      | W4-W5 | W6-W7 | 0.961 | 0.961 | 33 | 24 | ns  | 1      |
|        |    |      | W4-W5 | W8-W9 | 0.961 | 0.956 | 33 | 30 | ns  | 0.947  |
|        |    |      | W6-W7 | W8-W9 | 0.961 | 0.956 | 24 | 30 | ns  | 0.959  |
| Fig.   | DN | LID  | W2-W3 | W4-W5 | 0.862 | 0.906 | 12 | 17 | ns  | 0.086  |
| Supp5e |    | CORR | W2-W3 | W6-W7 | 0.862 | 0.925 | 12 | 10 | *** | <0.001 |
|        |    |      | W2-W3 | W8-W9 | 0.862 | 0.899 | 12 | 12 | **  | 0.008  |
|        |    |      | W4-W5 | W6-W7 | 0.906 | 0.925 | 17 | 10 | ns  | 0.764  |
|        |    |      | W4-W5 | W8-W9 | 0.906 | 0.899 | 17 | 12 | ns  | 0.982  |
|        |    |      | W6-W7 | W8-W9 | 0.925 | 0.899 | 10 | 12 | ns  | 0.219  |
| Fig.   | DN | LID  | W2-W3 | W4-W5 | 0.934 | 0.926 | 34 | 26 | ns  | 0.830  |
| Supp5e |    | PREV | W2-W3 | W6-W7 | 0.934 | 0.951 | 34 | 25 | ns  | 0.284  |
|        |    |      | W2-W3 | W8-W9 | 0.934 | 0.975 | 34 | 16 | **  | 0.001  |
|        |    |      | W4-W5 | W6-W7 | 0.926 | 0.951 | 26 | 25 | ns  | 0.070  |
|        |    |      | W4-W5 | W8-W9 | 0.926 | 0.975 | 26 | 16 | *** | <0.001 |
|        |    |      | W6-W7 | W8-W9 | 0.951 | 0.975 | 25 | 16 | ns  | 0.143  |
| Fig.   | FN | SHAM | W2-W3 | W4-W5 | 0.875 | 0.903 | 7  | 8  | ns  | 0.689  |
| Supp5f |    |      | W2-W3 | W6-W7 | 0.875 | 0.948 | 7  | 3  | ns  | 0.185  |
|        |    |      | W2-W3 | W8-W9 | 0.875 | 0.967 | 7  | 3  | ns  | 0.069  |
|        |    |      | W4-W5 | W6-W7 | 0.903 | 0.948 | 8  | 3  | ns  | 0.563  |

|        |    |      |       |       |       |       |    |    |     |        |
|--------|----|------|-------|-------|-------|-------|----|----|-----|--------|
|        |    |      | W4-W5 | W8-W9 | 0.903 | 0.967 | 8  | 3  | ns  | 0.275  |
|        |    |      | W6-W7 | W8-W9 | 0.948 | 0.967 | 3  | 3  | ns  | 0.966  |
| Fig.   | FN | LID  | W2-W3 | W4-W5 | 0.919 | 0.977 | 41 | 42 | *** | <0.001 |
| Supp5f |    |      | W2-W3 | W6-W7 | 0.919 | 0.957 | 41 | 49 | **  | 0.004  |
|        |    |      | W2-W3 | W8-W9 | 0.919 | 0.950 | 41 | 27 | ns  | 0.076  |
|        |    |      | W4-W5 | W6-W7 | 0.977 | 0.957 | 42 | 49 | ns  | 0.254  |
|        |    |      | W4-W5 | W8-W9 | 0.977 | 0.950 | 42 | 27 | ns  | 0.154  |
|        |    |      | W6-W7 | W8-W9 | 0.957 | 0.950 | 49 | 27 | ns  | 0.947  |
| Fig.   | FN | LID  | W2-W3 | W4-W5 | 0.835 | 0.935 | 15 | 22 | ns  | 0.080  |
| Supp5f |    | CORR | W2-W3 | W6-W7 | 0.835 | 0.880 | 15 | 20 | ns  | 0.723  |
|        |    |      | W2-W3 | W8-W9 | 0.835 | 0.923 | 15 | 17 | ns  | 0.133  |
|        |    |      | W4-W5 | W6-W7 | 0.935 | 0.880 | 22 | 20 | ns  | 0.143  |
|        |    |      | W4-W5 | W8-W9 | 0.935 | 0.923 | 22 | 17 | ns  | 0.792  |
|        |    |      | W6-W7 | W8-W9 | 0.880 | 0.923 | 20 | 17 | ns  | 0.288  |
| Fig.   | FN | LID  | W2-W3 | W4-W5 | 0.918 | 0.916 | 31 | 32 | ns  | 0.993  |
| Supp5f |    | PREV | W2-W3 | W6-W7 | 0.918 | 0.951 | 31 | 32 | **  | 0.001  |
|        |    |      | W2-W3 | W8-W9 | 0.918 | 0.962 | 31 | 29 | *** | <0.001 |
|        |    |      | W4-W5 | W6-W7 | 0.916 | 0.951 | 32 | 32 | *** | <0.001 |
|        |    |      | W4-W5 | W8-W9 | 0.916 | 0.962 | 32 | 29 | *** | <0.001 |
|        |    |      | W6-W7 | W8-W9 | 0.951 | 0.962 | 32 | 29 | ns  | 0.628  |

**Table S5: Number of cells and mice in each condition per week in the motor cortex (M1), the parafascicular nucleus (PF) of the thalamus and the**

**ventroanterior-ventrolateral complex (VAL) of the thalamus. Related to Figures 3c, 3d and Supplementary Figure 7d.**

| All cell | Region | M1    |      | PF    |      | VAL   |      |
|----------|--------|-------|------|-------|------|-------|------|
| Groupe   | Weeks  | Cells | Mice | Cells | Mice | Cells | Mice |
| SHAM     | W2-W3  | n=169 | N=5  | n=125 | N=5  | n=150 | N=5  |
|          | W4-W5  | n=137 | N=5  | n=107 | N=5  | n=136 | N=5  |
|          | W6-W7  | n=123 | N=5  | n=104 | N=5  | n=161 | N=5  |
|          | W8     | n=37  | N=3  | n=16  | N=2  | n=46  | N=3  |
| LID      | W2-W3  | n=107 | N=4  | n=83  | N=4  | n=135 | N=4  |
|          | W4-W5  | n=73  | N=3  | n=80  | N=3  | n=81  | N=3  |
|          | W6-W7  | n=65  | N=3  | n=83  | N=3  | n=105 | N=3  |
|          | W8     | n=34  | N=3  | n=32  | N=3  | n=46  | N=3  |
| LID_CORR | W2-W3  | n=253 | N=6  | n=244 | N=6  | n=229 | N=6  |
|          | W4-W5  | n=255 | N=6  | n=282 | N=6  | n=278 | N=6  |
|          | W6-W7  | n=208 | N=6  | n=148 | N=6  | n=178 | N=6  |
|          | W8     | n=99  | N=5  | n=70  | N=4  | n=59  | N=4  |
| LID_PREV | W2-W3  | n=221 | N=8  | n=159 | N=8  | n=164 | N=8  |
|          | W4-W5  | n=172 | N=8  | n=168 | N=8  | n=154 | N=8  |
|          | W6-W7  | n=120 | N=8  | n=131 | N=8  | n=123 | N=8  |
|          | W8     | n=41  | N=4  | n=37  | N=5  | n=29  | N=5  |

**Table S6: Precision measures, exact p-values, and replicate date relevant to Figures 3c, 3d and Supplementary Figure 7d.**

| Fig    | Reg | Group | Weeks1 | Weeks2 | Mean1   | Mean2   | n1  | n2  | Sum | Adjusted p Value |
|--------|-----|-------|--------|--------|---------|---------|-----|-----|-----|------------------|
| Fig.3c | M1  | SHAM  | W2-W3  | W4-W5  | 1.01 Hz | 0.93 Hz | 169 | 137 | ns  | 0.989            |
|        |     |       | W2-W3  | W6-W7  | 1.01 Hz | 0.80 Hz | 169 | 123 | ns  | 0.790            |
|        |     |       | W2-W3  | W8     | 1.01 Hz | 0.85 Hz | 169 | 37  | ns  | 0.880            |
|        |     |       | W4-W5  | W6-W7  | 0.93 Hz | 0.80 Hz | 123 | 137 | ns  | 0.934            |



|        |    |             |       |       |         |         |     |     |     |        |
|--------|----|-------------|-------|-------|---------|---------|-----|-----|-----|--------|
|        |    |             | W4-W5 | W8    | 0.93 Hz | 0.85 Hz | 123 | 37  | ns  | 0.772  |
|        |    |             | W6-W7 | W8    | 0.80 Hz | 0.85 Hz | 137 | 37  | ns  | 0.491  |
| Fig.3c | M1 | LID         | W2-W3 | W4-W5 | 0.30 Hz | 0.83 Hz | 107 | 73  | *** | <0.001 |
|        |    |             | W2-W3 | W6-W7 | 0.30 Hz | 1.16 Hz | 107 | 65  | *** | <0.001 |
|        |    |             | W2-W3 | W8    | 0.30 Hz | 1.39 Hz | 107 | 34  | *** | <0.001 |
|        |    |             | W4-W5 | W6-W7 | 0.83 Hz | 1.16 Hz | 73  | 65  | ns  | 0.567  |
|        |    |             | W4-W5 | W8    | 0.83 Hz | 1.39 Hz | 73  | 34  | ns  | 0.120  |
|        |    |             | W6-W7 | W8    | 1.16 Hz | 1.39 Hz | 65  | 34  | ns  | 0.768  |
| Fig.3c | M1 | LID<br>CORR | W2-W3 | W4-W5 | 0.58 Hz | 1.28 Hz | 253 | 255 | *** | <0.001 |
|        |    |             | W2-W3 | W6-W7 | 0.58 Hz | 0.93 Hz | 253 | 208 | *** | <0.001 |
|        |    |             | W2-W3 | W8    | 0.58 Hz | 0.95 Hz | 253 | 99  | *** | <0.001 |
|        |    |             | W4-W5 | W6-W7 | 1.28 Hz | 0.93 Hz | 255 | 208 | ns  | 0.933  |
|        |    |             | W4-W5 | W8    | 1.28 Hz | 0.95 Hz | 255 | 99  | ns  | 0.999  |
|        |    |             | W6-W7 | W8    | 0.93 Hz | 0.95 Hz | 208 | 99  | ns  | 0.914  |
| Fig.3c | M1 | LID<br>PREV | W2-W3 | W4-W5 | 0.56 Hz | 0.70 Hz | 221 | 172 | ns  | 0.594  |
|        |    |             | W2-W3 | W6-W7 | 0.56 Hz | 0.85 Hz | 221 | 120 | ns  | 0.156  |
|        |    |             | W2-W3 | W8    | 0.56 Hz | 0.56 Hz | 221 | 41  | ns  | 0.574  |
|        |    |             | W4-W5 | W6-W7 | 0.70 Hz | 0.85 Hz | 172 | 120 | ns  | 0.833  |
|        |    |             | W4-W5 | W8    | 0.70 Hz | 0.56 Hz | 172 | 41  | ns  | 0.983  |
|        |    |             | W6-W7 | W8    | 0.85 Hz | 0.56 Hz | 120 | 41  | ns  | 0.994  |
| Fig.3d | PF | SHAM        | W2-W3 | W4-W5 | 0.91 Hz | 0.71 Hz | 125 | 107 | ns  | 0.662  |
|        |    |             | W2-W3 | W6-W7 | 0.91 Hz | 0.68 Hz | 125 | 104 | ns  | 0.906  |
|        |    |             | W2-W3 | W8    | 0.91 Hz | 0.60 Hz | 125 | 16  | ns  | 0.766  |

|        |     |      |       |       |         |         |     |     |    |       |
|--------|-----|------|-------|-------|---------|---------|-----|-----|----|-------|
|        |     |      | W4-W5 | W6-W7 | 0.71 Hz | 0.68 Hz | 107 | 104 | ns | 0.966 |
|        |     |      | W4-W5 | W8    | 0.71 Hz | 0.60 Hz | 107 | 16  | ns | 0.994 |
|        |     |      | W6-W7 | W8    | 0.68 Hz | 0.60 Hz | 104 | 16  | ns | 0.946 |
| Fig.3d | PF  | LID  | W2-W3 | W4-W5 | 1.06 Hz | 0.34 Hz | 83  | 80  | ns | 0.053 |
|        |     |      | W2-W3 | W6-W7 | 1.06 Hz | 0.31 Hz | 83  | 83  | *  | 0.025 |
|        |     |      | W2-W3 | W8    | 1.06 Hz | 0.40 Hz | 83  | 32  | ns | 0.102 |
|        |     |      | W4-W5 | W6-W7 | 0.34 Hz | 0.31 Hz | 80  | 83  | ns | 0.993 |
|        |     |      | W4-W5 | W8    | 0.34 Hz | 0.40 Hz | 80  | 32  | ns | 1     |
|        |     |      | W6-W7 | W8    | 0.31 Hz | 0.40 Hz | 83  | 32  | ns | 0.992 |
| Fig.3d | PF  | LID  | W2-W3 | W4-W5 | 1.11 Hz | 0.82 Hz | 244 | 282 | ns | 0.057 |
|        |     | CORR | W2-W3 | W6-W7 | 1.11 Hz | 1.03 Hz | 244 | 148 | ns | 0.896 |
|        |     |      | W2-W3 | W8    | 1.11 Hz | 0.84 Hz | 244 | 70  | ns | 0.995 |
|        |     |      | W4-W5 | W6-W7 | 0.82 Hz | 1.03 Hz | 282 | 148 | ns | 0.280 |
|        |     |      | W4-W5 | W8    | 0.82 Hz | 0.84 Hz | 282 | 70  | ns | 0.234 |
|        |     |      | W6-W7 | W8    | 1.03 Hz | 0.84 Hz | 148 | 70  | ns | 0.984 |
| Fig.3d | PF  | LID  | W2-W3 | W4-W5 | 1.11 Hz | 0.58 Hz | 159 | 168 | ns | 0.086 |
|        |     | PREV | W2-W3 | W6-W7 | 1.11 Hz | 0.72 Hz | 159 | 131 | ns | 0.146 |
|        |     |      | W2-W3 | W8    | 1.11 Hz | 0.74 Hz | 159 | 37  | ns | 0.672 |
|        |     |      | W4-W5 | W6-W7 | 0.58 Hz | 0.72 Hz | 168 | 131 | ns | 0.996 |
|        |     |      | W4-W5 | W8    | 0.58 Hz | 0.74 Hz | 168 | 37  | ns | 0.906 |
|        |     |      | W6-W7 | W8    | 0.72 Hz | 0.74 Hz | 131 | 37  | ns | 0.958 |
| Fig.   | VAL | SHAM | W2-W3 | W4-W5 | 0.92 Hz | 0.72 Hz | 150 | 136 | ns | 0.298 |
| Supp7d |     |      | W2-W3 | W6-W7 | 0.92 Hz | 0.72 Hz | 150 | 161 | ns | 0.411 |

|        |     |      |       |       |         |         |     |     |    |       |
|--------|-----|------|-------|-------|---------|---------|-----|-----|----|-------|
|        |     |      | W2-W3 | W8    | 0.92 Hz | 0.75 Hz | 150 | 46  | ns | 0.890 |
|        |     |      | W4-W5 | W6-W7 | 0.72 Hz | 0.72 Hz | 136 | 161 | ns | 0.996 |
|        |     |      | W4-W5 | W8    | 0.72 Hz | 0.75 Hz | 136 | 46  | ns | 0.908 |
|        |     |      | W6-W7 | W8    | 0.72 Hz | 0.75 Hz | 161 | 46  | ns | 0.957 |
| Fig.   | VAL | LID  | W2-W3 | W4-W5 | 0.92 Hz | 0.48 Hz | 135 | 81  | ns | 0.856 |
| Supp7d |     |      | W2-W3 | W6-W7 | 0.92 Hz | 0.61 Hz | 135 | 105 | ns | 0.990 |
|        |     |      | W2-W3 | W8    | 0.92 Hz | 0.66 Hz | 135 | 46  | ns | 0.964 |
|        |     |      | W4-W5 | W6-W7 | 0.48 Hz | 0.61 Hz | 81  | 105 | ns | 0.967 |
|        |     |      | W4-W5 | W8    | 0.48 Hz | 0.66 Hz | 81  | 46  | ns | 0.992 |
|        |     |      | W6-W7 | W8    | 0.61 Hz | 0.66 Hz | 105 | 46  | ns | 0.998 |
| Fig.   | VAL | LID  | W2-W3 | W4-W5 | 1.09 Hz | 0.84 Hz | 229 | 278 | ns | 0.055 |
| Supp7d |     | CORR | W2-W3 | W6-W7 | 1.09 Hz | 1.06 Hz | 229 | 178 | ns | 0.993 |
|        |     |      | W2-W3 | W8    | 1.09 Hz | 0.80 Hz | 229 | 59  | ns | 0.829 |
|        |     |      | W4-W5 | W6-W7 | 0.84 Hz | 1.06 Hz | 278 | 178 | ns | 0.109 |
|        |     |      | W4-W5 | W8    | 0.84 Hz | 0.80 Hz | 278 | 59  | ns | 0.566 |
|        |     |      | W6-W7 | W8    | 1.06 Hz | 0.80 Hz | 178 | 59  | ns | 0.925 |
| Fig.   | VAL | LID  | W2-W3 | W4-W5 | 0.66 Hz | 0.52 Hz | 164 | 154 | ns | 0.952 |
| Supp7d |     | PREV | W2-W3 | W6-W7 | 0.66 Hz | 0.70 Hz | 164 | 123 | ns | 0.929 |
|        |     |      | W2-W3 | W8    | 0.66 Hz | 1.06 Hz | 164 | 29  | ns | 0.910 |
|        |     |      | W4-W5 | W6-W7 | 0.52 Hz | 0.70 Hz | 154 | 123 | ns | 0.665 |
|        |     |      | W4-W5 | W8    | 0.52 Hz | 1.06 Hz | 154 | 29  | ns | 0.685 |
|        |     |      | W6-W7 | W8    | 0.70 Hz | 1.06 Hz | 123 | 29  | ns | 0.999 |

**Table S7: Precision measures, exact p-values, and replicate date relevant to Figure 6b.**

| Fig     | Group1   | Group 2  | Mean1  | Mean2  | n1 | n2 | Sum | Adjusted p Value |
|---------|----------|----------|--------|--------|----|----|-----|------------------|
| Fig. 6b | LID      | SHAM     | 128.85 | 99.57  | 10 | 11 | *** | < 0.001          |
|         | LID_CORR | SHAM     | 107.64 | 99.57  | 7  | 11 | *   | 0.030            |
|         | LID_PREV | SHAM     | 96.73  | 99.57  | 11 | 11 | ns  | 0.444            |
|         | LID_CORR | LID      | 107.64 | 128.85 | 7  | 10 | ##  | 0.002            |
|         | LID_PREV | LID      | 96.73  | 128.85 | 11 | 10 | ### | < 0.001          |
|         | LID_PREV | LID_CORR | 96.73  | 107.64 | 11 | 7  | &   | 0.024            |

**Table S8: Precision measures, exact p-values, and replicate date relevant to Supplementary Figure 4**

| Fig        | Param | Week | Group1    | Group2    | Mean1 | Mean2 | n1 | n2 | Sum | Adjusted p Value |
|------------|-------|------|-----------|-----------|-------|-------|----|----|-----|------------------|
| Fig. Supp4 | Oral  | 4    | SHAM      | SHAM_CORR | 0.50  | 0.36  | 4  | 11 | ns  | 1                |
|            |       |      | SHAM      | SHAM_PREV | 0.50  | 0.50  | 4  | 4  | ns  | 1                |
|            |       |      | SHAM_CORR | SHAM_PREV | 0.36  | 0.50  | 11 | 4  | ns  | 1                |
| Fig. Supp4 | Oral  | 5    | SHAM      | SHAM_CORR | 0.50  | 0.1   | 4  | 10 | ns  | 0.51             |
|            |       |      | SHAM      | SHAM_PREV | 0.50  | 0.33  | 4  | 3  | ns  | 0.77             |
|            |       |      | SHAM_CORR | SHAM_PREV | 0.1   | 0.33  | 10 | 3  | ns  | 0.60             |
| Fig. Supp4 | Oral  | 6    | SHAM      | SHAM_CORR | 0.50  | 0.25  | 4  | 12 | ns  | 0.49             |
|            |       |      | SHAM      | SHAM_PREV | 0.50  | 0     | 4  | 3  | ns  | 0.49             |
|            |       |      | SHAM_CORR | SHAM_PREV | 0.25  | 0     | 12 | 3  | ns  | 0.49             |

|               |       |   |           |           |      |      |    |    |    |      |
|---------------|-------|---|-----------|-----------|------|------|----|----|----|------|
| Fig.<br>Supp4 | Oral  | 7 | SHAM      | SHAM_CORR | 0.50 | 0    | 4  | 8  | ns | 0.17 |
|               |       |   | SHAM      | SHAM_PREV | 0.50 | 0.33 | 4  | 3  | ns | 0.77 |
|               |       |   | SHAM_CORR | SHAM_PREV | 0    | 0.33 | 8  | 3  | ns | 0.18 |
| Fig.<br>Supp4 | Oral  | 8 | SHAM      | SHAM_CORR | 0.75 | 0.30 | 4  | 10 | ns | 0.33 |
|               |       |   | SHAM      | SHAM_PREV | 0.75 | 0    | 4  | 3  | ns | 0.33 |
|               |       |   | SHAM_CORR | SHAM_PREV | 0.30 | 0    | 10 | 3  | ns | 0.33 |
| Fig.<br>Supp4 | Oral  | 9 | SHAM      | SHAM_CORR | 0.25 | 0.20 | 4  | 5  | ns | 0.94 |
|               |       |   | SHAM      | SHAM_PREV | 0.25 | 1    | 4  | 2  | ns | 0.33 |
|               |       |   | SHAM_CORR | SHAM_PREV | 0.20 | 1    | 5  | 2  | ns | 0.33 |
| Fig.<br>Supp4 | Axial | 4 | SHAM      | SHAM_CORR | 0    | 0    | 4  | 5  | ns | -    |
|               |       |   | SHAM      | SHAM_PREV | 0    | 0    | 4  | 3  | ns | -    |
|               |       |   | SHAM_CORR | SHAM_PREV | 0    | 0    | 5  | 3  | ns | -    |
| Fig.<br>Supp4 | Axial | 5 | SHAM      | SHAM_CORR | 0    | 0    | 4  | 3  | ns | -    |
|               |       |   | SHAM      | SHAM_PREV | 0    | 0    | 4  | 2  | ns | -    |
|               |       |   | SHAM_CORR | SHAM_PREV | 0    | 0    | 3  | 2  | ns | -    |
| Fig.<br>Supp4 | Axial | 6 | SHAM      | SHAM_CORR | 0    | 0    | 4  | 5  | ns | -    |
|               |       |   | SHAM      | SHAM_PREV | 0    | 0    | 4  | 2  | ns | -    |
|               |       |   | SHAM_CORR | SHAM_PREV | 0    | 0    | 5  | 2  | ns | -    |
| Fig.<br>Supp4 | Axial | 7 | SHAM      | SHAM_CORR | 0    | 0    | 4  | 5  | ns | -    |
|               |       |   | SHAM      | SHAM_PREV | 0    | 0    | 4  | 2  | ns | -    |
|               |       |   | SHAM_CORR | SHAM_PREV | 0    | 0    | 5  | 2  | ns | -    |
| Fig.          | Axial | 8 | SHAM      | SHAM_CORR | 0    | 0    | 4  | 5  | ns | -    |

|               |       |   |           |           |      |      |   |   |    |      |
|---------------|-------|---|-----------|-----------|------|------|---|---|----|------|
| Supp4         |       |   | SHAM      | SHAM_PREV | 0    | 0    | 4 | 2 | ns | -    |
|               |       |   | SHAM_CORR | SHAM_PREV | 0    | 0    | 5 | 2 | ns | -    |
| Fig.<br>Supp4 | Axial | 9 | SHAM      | SHAM_CORR | 0    | 0    | 4 | 5 | ns | -    |
|               |       |   | SHAM      | SHAM_PREV | 0    | 0    | 4 | 2 | ns | -    |
|               |       |   | SHAM_CORR | SHAM_PREV | 0    | 0    | 5 | 2 | ns | -    |
| Fig.<br>Supp4 | Limb  | 4 | SHAM      | SHAM_CORR | 0    | 0.14 | 4 | 7 | ns | 0.51 |
|               |       |   | SHAM      | SHAM_PREV | 0    | 0    | 4 | 3 | ns | -    |
|               |       |   | SHAM_CORR | SHAM_PREV | 0.14 | 0    | 7 | 3 | ns | 0.51 |
| Fig.<br>Supp4 | Limb  | 5 | SHAM      | SHAM_CORR | 0    | 0.20 | 4 | 5 | ns | 0.54 |
|               |       |   | SHAM      | SHAM_PREV | 0    | 0    | 4 | 2 | ns | -    |
|               |       |   | SHAM_CORR | SHAM_PREV | 0.20 | 0    | 5 | 2 | ns | 0.54 |
| Fig.<br>Supp4 | Limb  | 6 | SHAM      | SHAM_CORR | 0    | 0    | 4 | 7 | ns | -    |
|               |       |   | SHAM      | SHAM_PREV | 0    | 0    | 4 | 2 | ns | -    |
|               |       |   | SHAM_CORR | SHAM_PREV | 0    | 0    | 7 | 2 | ns | -    |
| Fig.<br>Supp4 | Limb  | 7 | SHAM      | SHAM_CORR | 0    | 0.17 | 4 | 6 | ns | 0.58 |
|               |       |   | SHAM      | SHAM_PREV | 0    | 0    | 4 | 2 | ns | -    |
|               |       |   | SHAM_CORR | SHAM_PREV | 0.17 | 0    | 6 | 2 | ns | 0.58 |
| Fig.<br>Supp4 | Limb  | 8 | SHAM      | SHAM_CORR | 0    | 0.17 | 4 | 6 | ns | 0.58 |
|               |       |   | SHAM      | SHAM_PREV | 0    | 0    | 4 | 2 | ns | -    |
|               |       |   | SHAM_CORR | SHAM_PREV | 0.17 | 0    | 6 | 2 | ns | 0.58 |
| Fig.<br>Supp4 | Limb  | 9 | SHAM      | SHAM_CORR | 0    | 0.17 | 4 | 6 | ns | 0.58 |
|               |       |   | SHAM      | SHAM_PREV | 0    | 0    | 4 | 2 | ns | -    |

|  |  |  |           |           |      |   |   |   |    |      |
|--|--|--|-----------|-----------|------|---|---|---|----|------|
|  |  |  | SHAM_CORR | SHAM_PREV | 0.17 | 0 | 6 | 2 | ns | 0.58 |
|--|--|--|-----------|-----------|------|---|---|---|----|------|

**Table S9: Precision measures, exact p-values, and replicate date relevant to Supplementary Figure 7**

| Fig                      | Reg | Group        | Weeks1 | Weeks2 | Mean1   | Mean2   | n1 | n2 | Sum | Adjusted p Value |
|--------------------------|-----|--------------|--------|--------|---------|---------|----|----|-----|------------------|
| Fig.<br>Supp7<br>(upper) | IN  | SHAM         | W2-W3  | W4-W5  | 2.64 Hz | 2.52 Hz | 10 | 11 | ns  | 0.975            |
|                          |     |              | W2-W3  | W6-W7  | 2.64 Hz | 2.12 Hz | 10 | 10 | ns  | 0.551            |
|                          |     |              | W2-W3  | W8-W9  | 2.64 Hz | 2.88 Hz | 10 | 9  | ns  | 0.854            |
|                          |     |              | W4-W5  | W6-W7  | 2.52 Hz | 2.12 Hz | 11 | 10 | ns  | 0.743            |
|                          |     |              | W4-W5  | W8-W9  | 2.52 Hz | 2.88 Hz | 11 | 9  | ns  | 0.617            |
|                          |     |              | W6-W7  | W8-W9  | 2.12 Hz | 2.88 Hz | 10 | 9  | ns  | 0.223            |
| Fig.<br>Supp7<br>(upper) | IN  | SHAM<br>CORR | W2-W3  | W4-W5  | 2.37 Hz | 1.89 Hz | 13 | 21 | ns  | 0.228            |
|                          |     |              | W2-W3  | W6-W7  | 2.37 Hz | 2.27 Hz | 13 | 21 | *** | <0.001           |
|                          |     |              | W2-W3  | W8-W9  | 2.37 Hz | 2.28 Hz | 13 | 24 | ns  | 0.472            |
|                          |     |              | W4-W5  | W6-W7  | 1.89 Hz | 2.27 Hz | 21 | 21 | *   | 0.018            |
|                          |     |              | W4-W5  | W8-W9  | 1.89 Hz | 2.28 Hz | 21 | 24 | ns  | 0.914            |
|                          |     |              | W6-W7  | W8-W9  | 2.27 Hz | 2.28 Hz | 21 | 24 | **  | 0.002            |
| Fig.<br>Supp7<br>(upper) | IN  | SHAM<br>PREV | W2-W3  | W4-W5  | 2.84 Hz | 1.92 Hz | 18 | 23 | *** | < 0.001          |
|                          |     |              | W2-W3  | W6-W7  | 2.84 Hz | 2.14 Hz | 18 | 19 | *** | < 0.001          |
|                          |     |              | W2-W3  | W8-W9  | 2.84 Hz | 2.32 Hz | 18 | 16 | *   | 0.016            |
|                          |     |              | W4-W5  | W6-W7  | 1.92 Hz | 2.14 Hz | 23 | 19 | ns  | 0.492            |
|                          |     |              | W4-W5  | W8-W9  | 1.92 Hz | 2.32 Hz | 23 | 16 | ns  | 0.076            |
|                          |     |              | W6-W7  | W8-W9  | 2.14 Hz | 2.32 Hz | 19 | 16 | ns  | 0.716            |

|                              |    |                  |       |       |         |         |    |    |     |         |
|------------------------------|----|------------------|-------|-------|---------|---------|----|----|-----|---------|
| Fig.<br><br>Supp7<br>(upper) | DN | SHAM             | W2-W3 | W4-W5 | 2.82 Hz | 2.66 Hz | 28 | 30 | ns  | 0.406   |
|                              |    |                  | W2-W3 | W6-W7 | 2.82 Hz | 2.60 Hz | 28 | 24 | ns  | 0.742   |
|                              |    |                  | W2-W3 | W8-W9 | 2.82 Hz | 2.73 Hz | 28 | 28 | ns  | 0.806   |
|                              |    |                  | W4-W5 | W6-W7 | 2.66 Hz | 2.60 Hz | 30 | 24 | ns  | 0.998   |
|                              |    |                  | W4-W5 | W8-W9 | 2.66 Hz | 2.73 Hz | 30 | 28 | ns  | 0.916   |
|                              |    |                  | W6-W7 | W8-W9 | 2.60 Hz | 2.73 Hz | 24 | 28 | ns  | 0.954   |
| Fig.<br><br>Supp7<br>(upper) | DN | SHAM<br><br>PREV | W2-W3 | W4-W5 | 3.14 Hz | 2.15 Hz | 10 | 12 | *** | < 0.001 |
|                              |    |                  | W2-W3 | W6-W7 | 3.14 Hz | 2.08 Hz | 10 | 11 | *** | < 0.001 |
|                              |    |                  | W2-W3 | W8-W9 | 3.14 Hz | 2.57 Hz | 10 | 13 | *   | 0.024   |
|                              |    |                  | W4-W5 | W6-W7 | 2.15 Hz | 2.08 Hz | 12 | 11 | ns  | 0.982   |
|                              |    |                  | W4-W5 | W8-W9 | 2.15 Hz | 2.57 Hz | 12 | 13 | ns  | 0.126   |
|                              |    |                  | W6-W7 | W8-W9 | 2.08 Hz | 2.57 Hz | 11 | 13 | ns  | 0.062   |
| Fig.<br><br>Supp7<br>(upper) | FN | SHAM             | W2-W3 | W4-W5 | 2.71 Hz | 2.69 Hz | 7  | 8  | ns  | 1       |
|                              |    |                  | W2-W3 | W6-W7 | 2.71 Hz | 1.99 Hz | 7  | 3  | ns  | 0.191   |
|                              |    |                  | W2-W3 | W8-W9 | 2.71 Hz | 2.40 Hz | 7  | 3  | ns  | 0.808   |
|                              |    |                  | W4-W5 | W6-W7 | 2.69 Hz | 1.99 Hz | 8  | 3  | ns  | 0.193   |
|                              |    |                  | W4-W5 | W8-W9 | 2.69 Hz | 2.40 Hz | 8  | 3  | ns  | 0.821   |
|                              |    |                  | W6-W7 | W8-W9 | 1.99 Hz | 2.40 Hz | 3  | 3  | ns  | 0.739   |
| Fig.<br><br>Supp7<br>(upper) | FN | SHAM<br><br>PREV | W2-W3 | W4-W5 | 3.25 Hz | 2.34 Hz | 18 | 14 | *** | <0.001  |
|                              |    |                  | W2-W3 | W6-W7 | 3.25 Hz | 1.99 Hz | 18 | 15 | *** | <0.001  |
|                              |    |                  | W2-W3 | W8-W9 | 3.25 Hz | 2.28 Hz | 18 | 16 | *** | <0.001  |
|                              |    |                  | W4-W5 | W6-W7 | 2.34 Hz | 1.99 Hz | 14 | 15 | ns  | 0.290   |
|                              |    |                  | W4-W5 | W8-W9 | 2.34 Hz | 2.28 Hz | 14 | 16 | ns  | 0.990   |



|                           |    |      |       |       |          |          |    |    |     |        |
|---------------------------|----|------|-------|-------|----------|----------|----|----|-----|--------|
|                           |    |      | W6-W7 | W8-W9 | 1.99 Hz  | 2.28 Hz  | 15 | 16 | ns  | 0.423  |
| Fig.<br>Supp7<br>(middle) | IN | SHAM | W2-W3 | W4-W5 | 28.58 Hz | 22.26 Hz | 10 | 11 | ns  | 0.582  |
|                           |    |      | W2-W3 | W6-W7 | 28.58 Hz | 12.35 Hz | 10 | 5  | *   | 0.047  |
|                           |    |      | W2-W3 | W8-W9 | 28.58 Hz | 27.84 Hz | 10 | 9  | ns  | 0.999  |
|                           |    |      | W4-W5 | W6-W7 | 22.26 Hz | 12.35 Hz | 11 | 5  | ns  | 0.104  |
|                           |    |      | W4-W5 | W8-W9 | 22.26 Hz | 27.84 Hz | 11 | 9  | ns  | 0.725  |
|                           |    |      | W6-W7 | W8-W9 | 12.35 Hz | 27.84 Hz | 5  | 9  | ns  | 0.087  |
| Fig.<br>Supp7<br>(middle) | IN | SHAM | W2-W3 | W4-W5 | 38.92 Hz | 14.03 Hz | 7  | 9  | *** | <0.001 |
|                           |    |      | W2-W3 | W6-W7 | 38.92 Hz | 24.58 Hz | 7  | 9  | **  | 0.008  |
|                           |    |      | W2-W3 | W8-W9 | 38.92 Hz | 26.18 Hz | 7  | 12 | *   | 0.013  |
|                           |    | CORR | W4-W5 | W6-W7 | 14.03 Hz | 24.58 Hz | 9  | 9  | *   | 0.048  |
|                           |    |      | W4-W5 | W8-W9 | 14.03 Hz | 26.18 Hz | 9  | 12 | *   | 0.010  |
|                           |    |      | W6-W7 | W8-W9 | 24.58 Hz | 26.18 Hz | 9  | 12 | ns  | 0.970  |
| Fig.<br>Supp7<br>(middle) | IN | SHAM | W2-W3 | W4-W5 | 28.28 Hz | 18.96 Hz | 18 | 23 | **  | 0.001  |
|                           |    |      | W2-W3 | W6-W7 | 28.28 Hz | 19.39 Hz | 18 | 19 | **  | 0.004  |
|                           |    |      | W2-W3 | W8-W9 | 28.28 Hz | 21.53 Hz | 18 | 16 | ns  | 0.060  |
|                           |    |      | W4-W5 | W6-W7 | 18.96 Hz | 19.39 Hz | 23 | 19 | ns  | 0.998  |
|                           |    |      | W4-W5 | W8-W9 | 18.96 Hz | 21.53 Hz | 23 | 16 | ns  | 0.735  |
|                           |    |      | W6-W7 | W8-W9 | 19.39 Hz | 21.53 Hz | 19 | 16 | ns  | 0.846  |
| Fig.<br>Supp7<br>(middle) | DN | SHAM | W2-W3 | W4-W5 | 29.96 Hz | 22.64 Hz | 28 | 30 | ns  | 0.191  |
|                           |    |      | W2-W3 | W6-W7 | 29.96 Hz | 19.02 Hz | 28 | 5  | ns  | 0.369  |
|                           |    |      | W2-W3 | W8-W9 | 29.96 Hz | 26.47 Hz | 28 | 28 | ns  | 0.782  |
|                           |    |      | W4-W5 | W6-W7 | 22.64 Hz | 19.02 Hz | 30 | 5  | ns  | 0.949  |

|                           |    |                  |       |       |          |          |    |    |     |        |
|---------------------------|----|------------------|-------|-------|----------|----------|----|----|-----|--------|
|                           |    |                  | W4-W5 | W8-W9 | 22.64 Hz | 26.47 Hz | 30 | 28 | ns  | 0.718  |
|                           |    |                  | W6-W7 | W8-W9 | 19.02 Hz | 26.47 Hz | 5  | 28 | ns  | 0.685  |
| Fig.<br>Supp7<br>(middle) | DN | SHAM<br><br>PREV | W2-W3 | W4-W5 | 29.52 Hz | 18.95 Hz | 10 | 12 | **  | 0.006  |
|                           |    |                  | W2-W3 | W6-W7 | 29.52 Hz | 21.48 Hz | 10 | 11 | ns  | 0.060  |
|                           |    |                  | W2-W3 | W8-W9 | 29.52 Hz | 19.48 Hz | 10 | 13 | **  | 0.008  |
|                           |    |                  | W4-W5 | W6-W7 | 18.95 Hz | 21.48 Hz | 12 | 11 | ns  | 0.828  |
|                           |    |                  | W4-W5 | W8-W9 | 18.95 Hz | 19.48 Hz | 12 | 13 | ns  | 0.997  |
|                           |    |                  | W6-W7 | W8-W9 | 21.48 Hz | 19.48 Hz | 11 | 13 | ns  | 0.902  |
| Fig.<br>Supp7<br>(middle) | FN | SHAM             | W2-W3 | W4-W5 | 24.46 Hz | 25.18 Hz | 7  | 8  | ns  | 0.988  |
|                           |    |                  | W2-W3 | W8-W9 | 24.46 Hz | 19.50 Hz | 7  | 3  | ns  | 0.737  |
|                           |    |                  | W4-W5 | W8-W9 | 25.18 Hz | 19.50 Hz | 8  | 3  | ns  | 0.662  |
| Fig.<br>Supp7<br>(middle) | FN | SHAM<br><br>PREV | W2-W3 | W4-W5 | 34.79 Hz | 15.57 Hz | 18 | 14 | *** | <0.001 |
|                           |    |                  | W2-W3 | W6-W7 | 34.79 Hz | 12.11 Hz | 18 | 15 | *** | <0.001 |
|                           |    |                  | W2-W3 | W8-W9 | 34.79 Hz | 18.13 Hz | 18 | 16 | *** | <0.001 |
|                           |    |                  | W4-W5 | W6-W7 | 15.57 Hz | 12.11 Hz | 14 | 15 | ns  | 0.774  |
|                           |    |                  | W4-W5 | W8-W9 | 15.57 Hz | 18.13 Hz | 14 | 16 | ns  | 0.888  |
|                           |    |                  | W6-W7 | W8-W9 | 12.11 Hz | 18.13 Hz | 15 | 16 | ns  | 0.320  |
| Fig.<br>Supp7<br>(lower)  | IN | SHAM             | W2-W3 | W4-W5 | 18.12 Hz | 13.31 Hz | 10 | 11 | ns  | 0.749  |
|                           |    |                  | W2-W3 | W6-W7 | 18.12 Hz | 7.41 Hz  | 10 | 5  | ns  | 0.303  |
|                           |    |                  | W2-W3 | W8-W9 | 18.12 Hz | 18.49 Hz | 10 | 9  | ns  | 1      |
|                           |    |                  | W4-W5 | W6-W7 | 13.31 Hz | 7.41 Hz  | 11 | 5  | ns  | 0.754  |
|                           |    |                  | W4-W5 | W8-W9 | 13.31 Hz | 18.49 Hz | 11 | 9  | ns  | 0.723  |
|                           |    |                  | W6-W7 | W8-W9 | 7.41 Hz  | 18.49 Hz | 5  | 9  | ns  | 0.290  |

|                          |    |              |       |       |          |          |    |    |     |         |
|--------------------------|----|--------------|-------|-------|----------|----------|----|----|-----|---------|
| Fig.<br>Supp7<br>(lower) | IN | SHAM<br>CORR | W2-W3 | W4-W5 | 11.99 Hz | 10.13 Hz | 12 | 9  | ns  | 0.561   |
|                          |    |              | W2-W3 | W6-W7 | 11.99 Hz | 6.01 Hz  | 12 | 9  | *** | < 0.001 |
|                          |    |              | W2-W3 | W8-W9 | 11.99 Hz | 10.57 Hz | 12 | 12 | ns  | 0.703   |
|                          |    |              | W4-W5 | W6-W7 | 10.13 Hz | 6.01 Hz  | 9  | 9  | *   | 0.047   |
|                          |    |              | W4-W5 | W8-W9 | 10.13 Hz | 10.57 Hz | 9  | 12 | ns  | 0.989   |
|                          |    |              | W6-W7 | W8-W9 | 6.01 Hz  | 10.57 Hz | 9  | 12 | *   | 0.013   |
| Fig.<br>Supp7<br>(lower) | IN | SHAM<br>PREV | W2-W3 | W4-W5 | 15.70 Hz | 6.49 Hz  | 18 | 23 | *** | <0.001  |
|                          |    |              | W2-W3 | W6-W7 | 15.70 Hz | 8.38 Hz  | 18 | 19 | **  | 0.002   |
|                          |    |              | W2-W3 | W8-W9 | 15.70 Hz | 10.02 Hz | 18 | 16 | *   | 0.036   |
|                          |    |              | W4-W5 | W6-W7 | 6.49 Hz  | 8.38 Hz  | 23 | 19 | ns  | 0.307   |
|                          |    |              | W4-W5 | W8-W9 | 6.49 Hz  | 10.02 Hz | 23 | 16 | ns  | 0.074   |
|                          |    |              | W6-W7 | W8-W9 | 8.38 Hz  | 10.02 Hz | 19 | 16 | ns  | 0.703   |
| Fig.<br>Supp7<br>(lower) | DN | SHAM         | W2-W3 | W4-W5 | 15.57 Hz | 15.49 Hz | 28 | 30 | ns  | 1       |
|                          |    |              | W2-W3 | W6-W7 | 15.57 Hz | 14.47 Hz | 28 | 19 | ns  | 0.980   |
|                          |    |              | W2-W3 | W8-W9 | 15.57 Hz | 15.62 Hz | 28 | 28 | ns  | 1       |
|                          |    |              | W4-W5 | W6-W7 | 15.49 Hz | 14.47 Hz | 30 | 19 | ns  | 0.984   |
|                          |    |              | W4-W5 | W8-W9 | 15.49 Hz | 15.62 Hz | 30 | 28 | ns  | 1       |
|                          |    |              | W6-W7 | W8-W9 | 14.47 Hz | 15.62 Hz | 19 | 28 | ns  | 0.977   |
| Fig.<br>Supp7<br>(lower) | DN | SHAM<br>PREV | W2-W3 | W4-W5 | 25.75 Hz | 8.78 Hz  | 10 | 12 | *** | <0.001  |
|                          |    |              | W2-W3 | W6-W7 | 25.75 Hz | 8.23 Hz  | 10 | 11 | *** | <0.001  |
|                          |    |              | W2-W3 | W8-W9 | 25.75 Hz | 12.22 Hz | 10 | 13 | *** | <0.001  |
|                          |    |              | W4-W5 | W6-W7 | 8.78 Hz  | 8.23 Hz  | 12 | 11 | ns  | 0.997   |
|                          |    |              | W4-W5 | W8-W9 | 8.78 Hz  | 12.22 Hz | 12 | 13 | ns  | 0.570   |

|                  |    |      |       |       |          |          |    |    |     |        |
|------------------|----|------|-------|-------|----------|----------|----|----|-----|--------|
|                  |    |      | W6-W7 | W8-W9 | 8.23 Hz  | 12.22 Hz | 11 | 13 | ns  | 0.464  |
| Fig.             | FN | SHAM | W2-W3 | W4-W5 | 15.59 Hz | 15.16 Hz | 7  | 8  | ns  | 0.994  |
| Supp7<br>(lower) |    |      | W2-W3 | W8-W9 | 15.59 Hz | 10.37 Hz | 7  | 3  | ns  | 0.623  |
|                  |    |      | W4-W5 | W8-W9 | 15.16 Hz | 10.37 Hz | 8  | 3  | ns  | 0.660  |
| Fig.             | FN | SHAM | W2-W3 | W4-W5 | 26.22 Hz | 11.01 Hz | 18 | 14 | *** | <0.001 |
| Supp7<br>(lower) |    | PREV | W2-W3 | W6-W7 | 26.22 Hz | 7.32 Hz  | 18 | 15 | *** | <0.001 |
|                  |    |      | W2-W3 | W8-W9 | 26.22 Hz | 11.81 Hz | 18 | 16 | *** | <0.001 |
|                  |    |      | W4-W5 | W6-W7 | 11.01 Hz | 7.32 Hz  | 14 | 15 | ns  | 0.714  |
|                  |    |      | W4-W5 | W8-W9 | 11.01 Hz | 11.81 Hz | 14 | 16 | ns  | 0.995  |
|                  |    |      | W6-W7 | W8-W9 | 7.32 Hz  | 11.81 Hz | 15 | 16 | ns  | 0.545  |

**Table S10: Precision measures, exact p-values, and replicate date relevant to Supplementary Figure8a**

| Fig    | Reg | Group | Weeks1 | Weeks2 | Mean1   | Mean2   | n1 | n2 | Sum | Adjusted p Value |
|--------|-----|-------|--------|--------|---------|---------|----|----|-----|------------------|
| Fig.   | IN  | SHAM  | W2-W3  | W4-W5  | 1.78 Hz | 2.25 Hz | 10 | 11 | ns  | 0.768            |
| Supp8a |     |       | W2-W3  | W6-W7  | 1.78 Hz | 0.30 Hz | 10 | 5  | ns  | 0.091            |
|        |     |       | W2-W3  | W8-W9  | 1.78 Hz | 2.20 Hz | 10 | 9  | ns  | 0.839            |
|        |     |       | W4-W5  | W6-W7  | 2.25 Hz | 0.30 Hz | 11 | 5  | *   | 0.014            |
|        |     |       | W4-W5  | W8-W9  | 2.25 Hz | 2.20 Hz | 11 | 9  | ns  | 1                |
|        |     |       | W6-W7  | W8-W9  | 0.30 Hz | 2.20 Hz | 5  | 9  | *   | 0.021            |
| Fig.   | IN  | LID   | W2-W3  | W4-W5  | 1.25 Hz | 0.26 Hz | 25 | 8  | *   | 0.011            |
| Supp8a |     |       | W2-W3  | W6-W7  | 1.25 Hz | 0.12 Hz | 25 | 9  | **  | 0.002            |

|        |    |      |       |       |         |         |    |    |     |        |
|--------|----|------|-------|-------|---------|---------|----|----|-----|--------|
|        |    |      | W2-W3 | W8-W9 | 1.25 Hz | 0.22 Hz | 25 | 13 | **  | 0.006  |
|        |    |      | W4-W5 | W6-W7 | 0.26 Hz | 0.12 Hz | 8  | 9  | ns  | 0.400  |
|        |    |      | W4-W5 | W8-W9 | 0.26 Hz | 0.22 Hz | 8  | 13 | ns  | 0.949  |
|        |    |      | W6-W7 | W8-W9 | 0.12 Hz | 0.22 Hz | 9  | 13 | ns  | 0.053  |
| Fig.   | IN | LID  | W2-W3 | W4-W5 | 0.70 Hz | 2.70 Hz | 19 | 24 | ns  | 0.193  |
| Supp8a |    | CORR | W2-W3 | W6-W7 | 0.70 Hz | 0.94 Hz | 19 | 12 | ns  | 0.997  |
|        |    |      | W2-W3 | W8-W9 | 0.70 Hz | 2.10 Hz | 19 | 11 | ns  | 0.664  |
|        |    |      | W4-W5 | W6-W7 | 2.70 Hz | 0.94 Hz | 24 | 12 | ns  | 0.418  |
|        |    |      | W4-W5 | W8-W9 | 2.70 Hz | 2.10 Hz | 24 | 11 | ns  | 0.956  |
|        |    |      | W6-W7 | W8-W9 | 0.94 Hz | 2.10 Hz | 12 | 11 | ns  | 0.825  |
| Fig.   | IN | LID  | W2-W3 | W4-W5 | 0.94 Hz | 1.03 Hz | 31 | 32 | ns  | 0.979  |
| Supp8a |    | PREV | W2-W3 | W6-W7 | 0.94 Hz | 1.34 Hz | 31 | 26 | ns  | 0.407  |
|        |    |      | W2-W3 | W8-W9 | 0.94 Hz | 1.31 Hz | 31 | 27 | ns  | 0.477  |
|        |    |      | W4-W5 | W6-W7 | 1.03 Hz | 1.34 Hz | 32 | 26 | ns  | 0.633  |
|        |    |      | W4-W5 | W8-W9 | 1.03 Hz | 1.31 Hz | 32 | 27 | ns  | 0.708  |
|        |    |      | W6-W7 | W8-W9 | 1.34 Hz | 1.31 Hz | 26 | 27 | ns  | 0.999  |
| Fig.   | DN | SHAM | W2-W3 | W4-W5 | 1.21 Hz | 1.52 Hz | 28 | 30 | ns  | 0.853  |
| Supp8a |    |      | W2-W3 | W6-W7 | 1.21 Hz | 0.60 Hz | 28 | 5  | ns  | 0.825  |
|        |    |      | W2-W3 | W8-W9 | 1.21 Hz | 1.74 Hz | 28 | 28 | ns  | 0.538  |
|        |    |      | W4-W5 | W6-W7 | 1.52 Hz | 0.60 Hz | 30 | 5  | ns  | 0.564  |
|        |    |      | W4-W5 | W8-W9 | 1.52 Hz | 1.74 Hz | 30 | 28 | ns  | 0.942  |
|        |    |      | W6-W7 | W8-W9 | 0.60 Hz | 1.74 Hz | 5  | 28 | ns  | 0.383  |
| Fig.   | DN | LID  | W2-W3 | W4-W5 | 1.27 Hz | 0.25 Hz | 41 | 33 | *** | <0.001 |

|                |    |       |       |       |         |         |         |    |     |        |
|----------------|----|-------|-------|-------|---------|---------|---------|----|-----|--------|
| Supp8a         |    |       | W2-W3 | W6-W7 | 1.27 Hz | 0.40 Hz | 41      | 17 | **  | 0.002  |
|                |    |       | W2-W3 | W8-W9 | 1.27 Hz | 0.28 Hz | 41      | 27 | *** | <0.001 |
|                |    |       | W4-W5 | W6-W7 | 0.25 Hz | 0.40 Hz | 33      | 17 | ns  | 0.447  |
|                |    |       | W4-W5 | W8-W9 | 0.25 Hz | 0.28 Hz | 33      | 27 | ns  | 0.984  |
|                |    |       | W6-W7 | W8-W9 | 0.40 Hz | 0.28 Hz | 17      | 27 | ns  | 0.702  |
| Fig.<br>Supp8a | DN | LID   | W2-W3 | W4-W5 | 1.56 Hz | 0.27 Hz | 12      | 17 | ns  | 0.083  |
|                |    | CORR  | W2-W3 | W6-W7 | 1.56 Hz | 0.36 Hz | 12      | 10 | ns  | 0.115  |
|                |    |       | W2-W3 | W8-W9 | 1.56 Hz | 0.38 Hz | 12      | 12 | ns  | 0.122  |
|                |    |       | W4-W5 | W6-W7 | 0.27 Hz | 0.36 Hz | 17      | 10 | ns  | 0.814  |
|                |    |       | W4-W5 | W8-W9 | 0.27 Hz | 0.38 Hz | 17      | 12 | ns  | 0.641  |
|                |    |       | W6-W7 | W8-W9 | 0.36 Hz | 0.38 Hz | 10      | 12 | ns  | 0.998  |
| Fig.<br>Supp8a | DN |       | LID   | W2-W3 | W4-W5   | 1.77 Hz | 1.11 Hz | 34 | 26  | ns     |
|                |    | PREV  | W2-W3 | W6-W7 | 1.77 Hz | 0.52 Hz | 34      | 25 | *   | 0.010  |
|                |    |       | W2-W3 | W8-W9 | 1.77 Hz | 1.04 Hz | 34      | 16 | ns  | 0.372  |
|                |    |       | W4-W5 | W6-W7 | 1.11 Hz | 0.52 Hz | 26      | 25 | ns  | 0.481  |
|                |    |       | W4-W5 | W8-W9 | 1.11 Hz | 1.04 Hz | 26      | 16 | ns  | 0.998  |
|                |    |       | W6-W7 | W8-W9 | 0.52 Hz | 1.04 Hz | 25      | 16 | ns  | 0.698  |
| Fig.<br>Supp8a | FN |       | SHAM  | W2-W3 | W4-W5   | 1.56 Hz | 2.71 Hz | 7  | 8   | ns     |
|                |    | W2-W3 |       | W8-W9 | 1.56 Hz | 2.01 Hz | 7       | 3  | ns  | 0.845  |
|                |    | W4-W5 |       | W8-W9 | 2.71 Hz | 2.01 Hz | 8       | 3  | ns  | 0.661  |
| Fig.<br>Supp8a | FN | LID   | W2-W3 | W4-W5 | 0.92 Hz | 0.65 Hz | 41      | 42 | ns  | 0.592  |
|                |    |       | W2-W3 | W6-W7 | 0.92 Hz | 0.32 Hz | 41      | 49 | *   | 0.015  |
|                |    |       | W2-W3 | W8-W9 | 0.92 Hz | 0.44 Hz | 41      | 27 | ns  | 0.080  |



|                |    |      |       |       |         |         |    |    |    |       |
|----------------|----|------|-------|-------|---------|---------|----|----|----|-------|
| Fig.<br>Supp8b | IN | SHAM | W2-W3 | W4-W5 | 1.19 Hz | 0.58 Hz | 10 | 11 | ns | 0.504 |
|                |    |      | W2-W3 | W6-W7 | 1.19 Hz | 0.19 Hz | 10 | 5  | ns | 0.141 |
|                |    |      | W2-W3 | W8-W9 | 1.19 Hz | 0.30 Hz | 10 | 9  | ns | 0.211 |
|                |    |      | W4-W5 | W6-W7 | 0.58 Hz | 0.19 Hz | 11 | 5  | ** | 0.005 |
|                |    |      | W4-W5 | W8-W9 | 0.58 Hz | 0.30 Hz | 11 | 9  | ns | 0.050 |
|                |    |      | W6-W7 | W8-W9 | 0.19 Hz | 0.30 Hz | 5  | 9  | ns | 0.173 |
| Fig.<br>Supp8b | IN | LID  | W2-W3 | W4-W5 | 0.77 Hz | 1.39 Hz | 25 | 8  | ns | 0.773 |
|                |    |      | W2-W3 | W6-W7 | 0.77 Hz | 1.01 Hz | 25 | 9  | ns | 0.981 |
|                |    |      | W2-W3 | W8-W9 | 0.77 Hz | 1.53 Hz | 25 | 13 | ns | 0.507 |
|                |    |      | W4-W5 | W6-W7 | 1.39 Hz | 1.01 Hz | 8  | 9  | ns | 0.960 |
|                |    |      | W4-W5 | W8-W9 | 1.39 Hz | 1.53 Hz | 8  | 13 | ns | 0.997 |
|                |    |      | W6-W7 | W8-W9 | 1.01 Hz | 1.53 Hz | 9  | 13 | ns | 0.873 |
| Fig.<br>Supp8b | IN | CORR | W2-W3 | W4-W5 | 0.49 Hz | 0.56 Hz | 19 | 24 | ns | 0.974 |
|                |    |      | W2-W3 | W6-W7 | 0.49 Hz | 1.10 Hz | 19 | 12 | ** | 0.005 |
|                |    |      | W2-W3 | W8-W9 | 0.49 Hz | 0.60 Hz | 19 | 11 | ns | 0.926 |
|                |    |      | W4-W5 | W6-W7 | 0.56 Hz | 1.10 Hz | 24 | 12 | ** | 0.009 |
|                |    |      | W4-W5 | W8-W9 | 0.56 Hz | 0.60 Hz | 24 | 11 | ns | 0.992 |
|                |    |      | W6-W7 | W8-W9 | 1.10 Hz | 0.60 Hz | 12 | 11 | ns | 0.067 |
| Fig.<br>Supp8b | IN | PREV | W2-W3 | W4-W5 | 0.78 Hz | 0.94 Hz | 31 | 32 | ns | 0.641 |
|                |    |      | W2-W3 | W6-W7 | 0.78 Hz | 1.05 Hz | 31 | 26 | ns | 0.126 |
|                |    |      | W2-W3 | W8-W9 | 0.78 Hz | 0.73 Hz | 31 | 27 | ns | 0.976 |
|                |    |      | W4-W5 | W6-W7 | 0.94 Hz | 1.05 Hz | 32 | 26 | ns | 0.871 |
|                |    |      | W4-W5 | W8-W9 | 0.94 Hz | 0.73 Hz | 32 | 27 | ns | 0.421 |



|                |    |      |       |       |         |         |    |    |     |        |
|----------------|----|------|-------|-------|---------|---------|----|----|-----|--------|
|                |    |      | W6-W7 | W8-W9 | 1.05 Hz | 0.73 Hz | 26 | 27 | ns  | 0.051  |
| Fig.<br>Supp8b | DN | SHAM | W2-W3 | W4-W5 | 0.46 Hz | 0.39 Hz | 28 | 30 | ns  | 0.884  |
|                |    |      | W2-W3 | W6-W7 | 0.46 Hz | 0.31 Hz | 28 | 5  | ns  | 0.862  |
|                |    |      | W2-W3 | W8-W9 | 0.46 Hz | 0.48 Hz | 28 | 28 | ns  | 0.996  |
|                |    |      | W4-W5 | W6-W7 | 0.39 Hz | 0.31 Hz | 30 | 5  | ns  | 0.980  |
|                |    |      | W4-W5 | W8-W9 | 0.39 Hz | 0.48 Hz | 30 | 28 | ns  | 0.778  |
|                |    |      | W6-W7 | W8-W9 | 0.31 Hz | 0.48 Hz | 5  | 28 | ns  | 0.805  |
| Fig.<br>Supp8b | DN | LID  | W2-W3 | W4-W5 | 0.61 Hz | 1.19 Hz | 41 | 33 | *** | <0.001 |
|                |    |      | W2-W3 | W6-W7 | 0.61 Hz | 2.47 Hz | 41 | 17 | ns  | 0.299  |
|                |    |      | W2-W3 | W8-W9 | 0.61 Hz | 3.10 Hz | 41 | 27 | *** | <0.001 |
|                |    |      | W4-W5 | W6-W7 | 1.19 Hz | 2.47 Hz | 33 | 17 | ns  | 0.609  |
|                |    |      | W4-W5 | W8-W9 | 1.19 Hz | 3.10 Hz | 33 | 27 | **  | 0.006  |
|                |    |      | W6-W7 | W8-W9 | 2.47 Hz | 3.10 Hz | 17 | 27 | ns  | 0.943  |
| Fig.<br>Supp8b | DN | LID  | W2-W3 | W4-W5 | 0.42 Hz | 0.66 Hz | 12 | 17 | ns  | 0.371  |
|                |    |      | W2-W3 | W6-W7 | 0.42 Hz | 0.44 Hz | 12 | 10 | ns  | 0.999  |
|                |    | CORR | W2-W3 | W8-W9 | 0.42 Hz | 0.42 Hz | 12 | 12 | ns  | 1      |
|                |    |      | W4-W5 | W6-W7 | 0.66 Hz | 0.44 Hz | 17 | 10 | ns  | 0.495  |
|                |    |      | W4-W5 | W8-W9 | 0.66 Hz | 0.42 Hz | 17 | 12 | ns  | 0.363  |
|                |    |      | W6-W7 | W8-W9 | 0.44 Hz | 0.42 Hz | 10 | 12 | ns  | 0.999  |
| Fig.<br>Supp8b | DN | LID  | W2-W3 | W4-W5 | 0.47 Hz | 0.86 Hz | 34 | 26 | **  | 0.009  |
|                |    |      | W2-W3 | W6-W7 | 0.47 Hz | 1.52 Hz | 34 | 25 | *** | <0.001 |
|                |    |      | W2-W3 | W8-W9 | 0.47 Hz | 0.60 Hz | 34 | 16 | ns  | 0.324  |
|                |    |      | W4-W5 | W6-W7 | 0.86 Hz | 1.52 Hz | 26 | 25 | ns  | 0.061  |

|        |    |      |       |       |         |         |    |    |     |        |
|--------|----|------|-------|-------|---------|---------|----|----|-----|--------|
|        |    |      | W4-W5 | W8-W9 | 0.86 Hz | 0.60 Hz | 26 | 16 | ns  | 0.192  |
|        |    |      | W6-W7 | W8-W9 | 1.52 Hz | 0.60 Hz | 25 | 16 | **  | 0.004  |
| Fig.   | FN | SHAM | W2-W3 | W4-W5 | 0.85 Hz | 0.58 Hz | 7  | 8  | ns  | 0.383  |
| Supp8b |    |      | W2-W3 | W8-W9 | 0.85 Hz | 0.25 Hz | 7  | 3  | ns  | 0.083  |
|        |    |      | W4-W5 | W8-W9 | 0.58 Hz | 0.25 Hz | 8  | 3  | ns  | 0.403  |
| Fig.   | FN | LID  | W2-W3 | W4-W5 | 0.64 Hz | 1.00 Hz | 41 | 42 | ns  | 0.435  |
| Supp8b |    |      | W2-W3 | W6-W7 | 0.64 Hz | 2.91 Hz | 41 | 49 | **  | 0.006  |
|        |    |      | W2-W3 | W8-W9 | 0.64 Hz | 1.27 Hz | 41 | 27 | ns  | 0.191  |
|        |    |      | W4-W5 | W6-W7 | 1.00 Hz | 2.91 Hz | 42 | 49 | *   | 0.019  |
|        |    |      | W4-W5 | W8-W9 | 1.00 Hz | 1.27 Hz | 42 | 27 | ns  | 0.670  |
|        |    |      | W6-W7 | W8-W9 | 2.91 Hz | 1.27 Hz | 49 | 27 | ns  | 0.073  |
| Fig.   | FN | LID  | W2-W3 | W4-W5 | 1.65 Hz | 0.73 Hz | 15 | 22 | ns  | 0.500  |
| Supp8b |    | CORR | W2-W3 | W6-W7 | 1.65 Hz | 0.79 Hz | 15 | 20 | ns  | 0.559  |
|        |    |      | W2-W3 | W8-W9 | 1.65 Hz | 0.66 Hz | 15 | 17 | ns  | 0.448  |
|        |    |      | W4-W5 | W6-W7 | 0.73 Hz | 0.79 Hz | 22 | 20 | ns  | 0.932  |
|        |    |      | W4-W5 | W8-W9 | 0.73 Hz | 0.66 Hz | 22 | 17 | ns  | 0.948  |
|        |    |      | W6-W7 | W8-W9 | 0.79 Hz | 0.66 Hz | 20 | 17 | ns  | 0.685  |
| Fig.   | FN | LID  | W2-W3 | W4-W5 | 0.71 Hz | 0.99 Hz | 31 | 32 | ns  | 0.072  |
| Supp8b |    | PREV | W2-W3 | W6-W7 | 0.71 Hz | 0.73 Hz | 31 | 32 | ns  | 0.993  |
|        |    |      | W2-W3 | W8-W9 | 0.71 Hz | 0.54 Hz | 31 | 29 | ns  | 0.136  |
|        |    |      | W4-W5 | W6-W7 | 0.99 Hz | 0.73 Hz | 32 | 32 | ns  | 0.134  |
|        |    |      | W4-W5 | W8-W9 | 0.99 Hz | 0.54 Hz | 32 | 29 | *** | <0.001 |
|        |    |      | W6-W7 | W8-W9 | 0.73 Hz | 0.54 Hz | 32 | 29 | ns  | 0.105  |

**Table S12: STDP in D2<sup>-</sup> and D2<sup>+</sup> MSN from SHAM, SHAM\_PREV, LID and LID\_PREV mice. Related to Figure 6.**

| <b>Group</b>    | <b>D2<sup>-</sup> MSN</b> | <b>D2<sup>+</sup> MSN</b> |
|-----------------|---------------------------|---------------------------|
| SHAM (N=5)      | 149 ± 2, p<0.0001 (n=11)  | 142 ± 4, p<0.0001 (n=10)  |
| SHAM_PREV (N=5) | 123 ± 1, p<0.0001 (n=10)  | 127 ± 1, p<0.0001 (n=10)  |
| LID (N=7)       | 172 ± 1, p<0.0001 (n=12)  | 132 ± 3, p<0.0001 (n=9)   |
| LID_PREV (N=5)  | 65 ± 1, p<0.0001 (n=9)    | 142 ± 6, p=0.0029 (n=10)  |
